# Supplementary material for: Guest recognition enhanced by lateral interactions
Source: PubMed Central journal article supplement — Chem Sci. 2019 Apr 23;10(19):5114–23. doi: 10.1039/c9sc00591a (PMC6531815; doi:10.1039/c9sc00591a), 2019-04-23
Supplement: SC-010-C9SC00591A-s001.pdf [file SC-010-C9SC00591A-s001.pdf]

# Guest recognition enhanced by lateral interactions

Tianyu Jiao,<sup>1,2</sup> Kang Cai,<sup>2</sup> Zhichang Liu,<sup>3</sup> Guangcheng Wu,<sup>1</sup> Libo Shen,<sup>1</sup> Chuyang Cheng,<sup>2</sup>  
Yuanning Feng,<sup>2</sup> Charlotte L. Stern,<sup>2</sup> J. Fraser Stoddart\*,<sup>2,4,5</sup> and Hao Li\*,<sup>1</sup>

<sup>1</sup> Department of Chemistry, Zhejiang University, Hangzhou 310027, P. R. China

<sup>2</sup> Department of Chemistry, Northwestern University, 2145 Sheridan Road, Evanston, Illinois 60208, USA

<sup>3</sup> School of Science, Westlake University, 18 Shilongshan Road, Hangzhou 310024, P. R. China

<sup>4</sup> Institute for Molecular Design and Synthesis, Tianjin University, Tianjin 300072, P. R. China.

<sup>5</sup> School of Chemistry, University of New South Wales, Sydney, NSW 2052, Australia.

## Supporting Information

### Table of Contents

|                                                                                     |            |
|-------------------------------------------------------------------------------------|------------|
| <b>1. Materials and General Methods</b> .....                                       | <b>S2</b>  |
| <b>2. Synthetic Protocols</b> .....                                                 | <b>S3</b>  |
| <b>3. NMR Spectra and HRMS Spectra</b> .....                                        | <b>S5</b>  |
| <b>4. Binding Studies and Characterization of Host-Guest Complex</b> .....          | <b>S14</b> |
| <b>5. Cyclic Voltammetry (CV) Analysis and UV-Vis-NIR Absorption spectrum</b> ..... | <b>S23</b> |
| <b>6. X-Ray Crystallography</b> .....                                               | <b>S24</b> |
| <b>7. Computational Analysis</b> .....                                              | <b>S34</b> |
| <b>8. Cartesian Coordinates for the Optimized Structures</b> .....                  | <b>S40</b> |

**9. References.....**

S53

## 1. Materials and General Methods

Chemicals were purchased as reagent grade and employed without further purification. Commercial grades of anhydrous MeCN and *N,N*-dimethylformamide (DMF) were used as solvents in all reactions. 2,4,6-Tris[4-(bromomethyl)phenyl]-1,3,5-triazine (**TBT**) was prepared according to literature procedures.<sup>1</sup> Thin layer chromatography (TLC) was performed on silica gel 60F254 (E Merck). Column chromatography was carried out on silica gel 60F (Merck 9385, 0.040–0.063 mm). All UV-Vis-NIR spectra were recorded in MeCN solvent using a Shimadzu UV-3600 spectrophotometer. Nuclear magnetic resonance (NMR) spectra were recorded at 298 K on Bruker Avance 500 and 600 spectrometers, with working frequencies of 500 and 600 MHz for <sup>1</sup>H, and 125 and 150 MHz for <sup>13</sup>C nuclei, respectively. Chemical shifts are reported in ppm relative to the signals corresponding to the residual non-deuterated solvents (CDCl<sub>3</sub>:  $\delta = 7.26$  ppm, CD<sub>3</sub>CN:  $\delta = 1.94$  ppm, D<sub>2</sub>O:  $\delta = 4.79$  ppm). High-resolution mass spectra were recorded on an Agilent 6210 Time-of-Flight (TOF) LC-MS, using an ESI source, coupled with Agilent 1100 HPLC stack, using direct infusion (0.6 mL min<sup>-1</sup>). Measurements at X-band (9.5 GHz) were performed with a Bruker Elexsys E580, equipped with a variable Q dielectric resonator (ER-4118X-MD5-W1). Cyclic voltammetry experiments were performed on a Gamry multipurpose instrument interfaced to a PC, using a glassy carbon working electrode (0.071 cm<sup>2</sup>, Cypress system). The electrode surface was polished routinely with an alumina/water slurry on a felt surface immediately before use. The counter electrode was a Pt coil and the reference electrode was an AgCl coated Ag wire. The concentrations of the samples were 0.5 mM in 100 mM electrolyte solutions of tetrabutylammonium hexafluorophosphate (TBAPF<sub>6</sub>) in DMF.

## 2. Synthetic Procedures

### Scheme S1. Synthesis of **TBTP**•3PF<sub>6</sub>

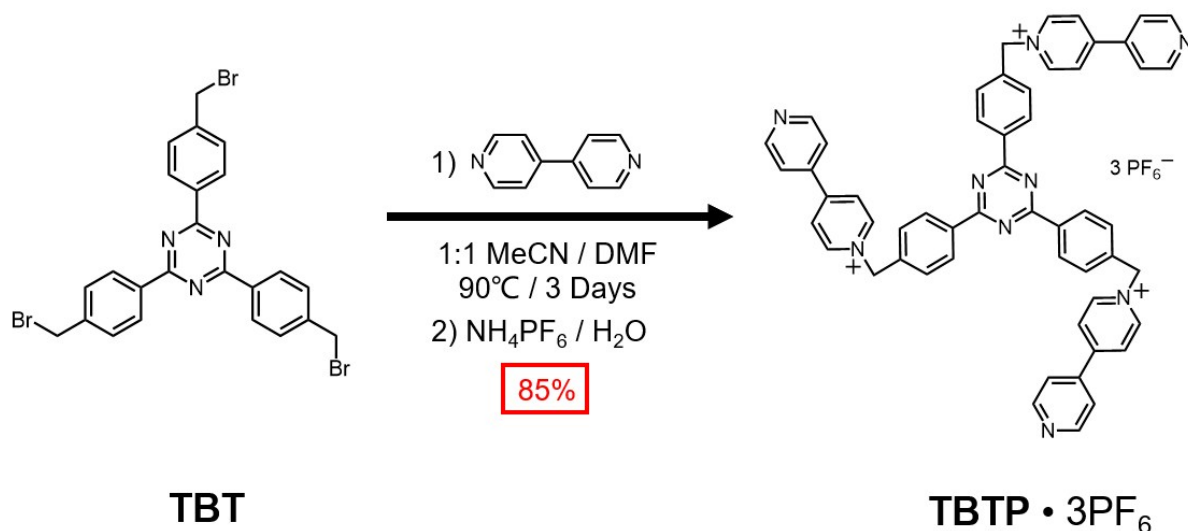

**TBTP**•3PF<sub>6</sub>: A suspension of **TBT** (1.05 g, 1.8 mmol) in MeCN (20 mL) was added in five aliquots slowly over 6 h into a refluxing solution of 4,4'-bipyridine (6.03, 38 mmol) in a mixed anhydrous solvent containing DMF (50 mL) and MeCN (50 mL) at 90 °C. The reaction mixture was further stirred for another 72 h at 90 °C. After cooling to room temperature, the yellow precipitate was collected by filtration and washed with Me<sub>2</sub>CO and CH<sub>2</sub>Cl<sub>2</sub>. The precipitate was dissolved in H<sub>2</sub>O (250 mL) followed by the addition of NH<sub>4</sub>PF<sub>6</sub> (~2 g), resulting in precipitation of pure **TBTP**•3PF<sub>6</sub> (1.90 g, 85%) as a light red solid that was collected by filtration. <sup>1</sup>H NMR (600 MHz, CD<sub>3</sub>CN): δ = 8.90 (d, *J* = 6.9 Hz, 6H), 8.87–8.85 (m, 12H), 8.36 (d, *J* = 6.9 Hz, 6H), 7.81 (d, *J*<sub>1</sub> = 6.2 Hz, 6H), 7.70 (d, *J*<sub>1</sub> = 8.3 Hz, 6H), 5.88 (s, 6H). <sup>13</sup>C NMR (125 MHz, CD<sub>3</sub>CN): δ = 172.1, 155.7, 152.0, 146.1, 142.2, 138.5, 138.1, 130.8, 130.6, 127.3, 122.9, 64.6. HRMS (ESI): *m/z* calcd for C<sub>54</sub>H<sub>42</sub>F<sub>12</sub>N<sub>9</sub>P<sub>2</sub> [*M* – PF<sub>6</sub>]<sup>+</sup> 1106.2847, found 1106.2831; calcd for C<sub>54</sub>H<sub>42</sub>F<sub>6</sub>N<sub>9</sub>P [*M* – 2PF<sub>6</sub>]<sup>2+</sup> 480.6597, found 480.6609.



**AzaEx<sup>2</sup>Cage•6Cl** (53 mg, 99%) as a yellow powder. <sup>1</sup>H NMR (500 MHz, D<sub>2</sub>O): δ = 9.19 (d, *J* = 6.5 Hz, 12H), 8.38 (d, *J* = 6.5 Hz, 12H), 8.31 (d, *J* = 7.5 Hz, 12H), 7.64 (d, *J* = 7.5 Hz, 12H), 5.92 (s, 12H). <sup>13</sup>C NMR (125 MHz, D<sub>2</sub>O): δ = 170.6, 149.6, 145.1, 138.0, 136.0, 130.0, 139.5, 127.2, 64.7. HRMS (ESI): *m/z* calcd for C<sub>78</sub>H<sub>60</sub>N<sub>12</sub> [*M* – 6Cl]<sup>6+</sup> 194.0838, found 194.0828.

**AzaEx<sup>2</sup>Cage•6CF<sub>3</sub>CO<sub>2</sub>**, another water-soluble counterpart of **AzaEx<sup>2</sup>Cage•6PF<sub>6</sub>**, was obtained by preparative reverse-phase HPLC (C<sub>18</sub> column) starting with H<sub>2</sub>O containing 0.1% TFA as eluent, and increasing to 50 % of MeCN / 0.1 % TFA. The fractions containing **AzaEx<sup>2</sup>Cage•6CF<sub>3</sub>CO<sub>2</sub>** were combined. After removing the solvent under vacuum, **AzaEx<sup>2</sup>Cage•6CF<sub>3</sub>CO<sub>2</sub>** was obtained (80% yield). <sup>1</sup>H NMR (500 MHz, CD<sub>3</sub>CN): δ = 9.13 (d, *J* = 7.0 Hz, 12H), 8.72 (d, *J* = 8.0 Hz, 12H), 8.33 (d, *J* = 7.0 Hz, 12H), 7.82 (d, *J* = 8.5 Hz, 12H), 5.92 (s, 12H). <sup>13</sup>C NMR (125 MHz, CD<sub>3</sub>CN): δ = 171.7, 160.5, 150.7, 146.3, 139.4, 138.1, 131.0, 130.9, 128.6, 65.6. HRMS (ESI): *m/z* calcd for C<sub>86</sub>H<sub>60</sub>F<sub>12</sub>N<sub>12</sub>O<sub>8</sub> [*M* – 2CF<sub>3</sub>CO<sub>2</sub>]<sup>2+</sup> 808.2227, found 808.2242.

### 3. NMR Spectra and HRMS Spectra

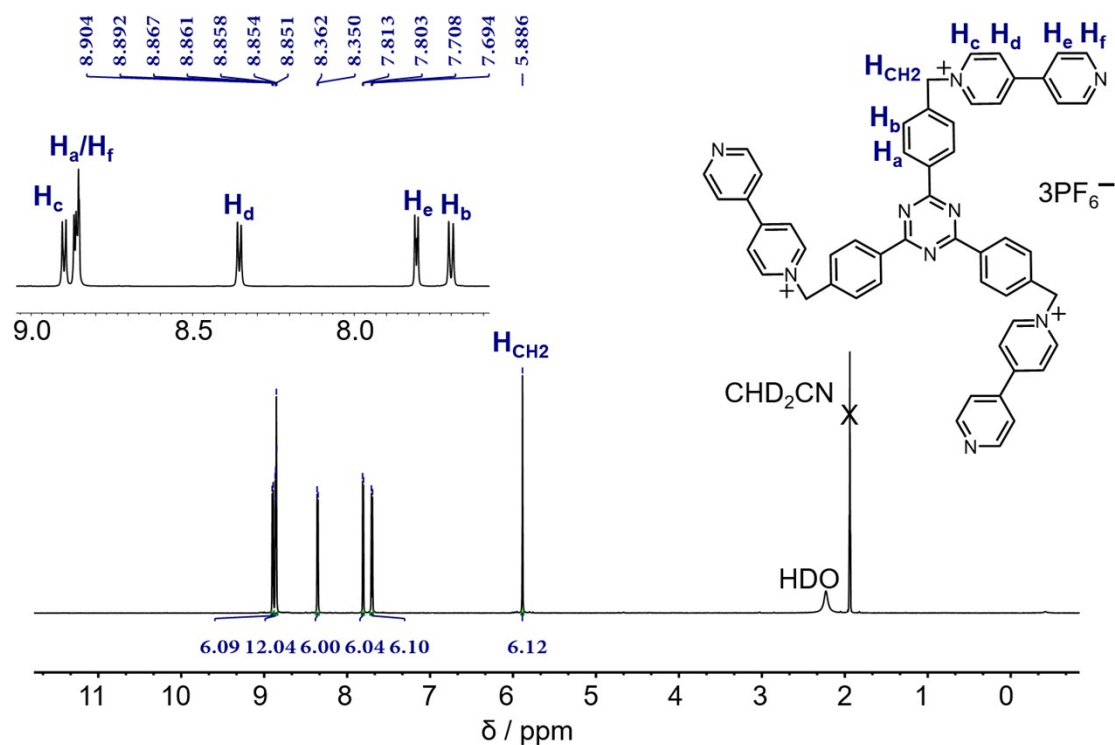

**Figure S1.** <sup>1</sup>H NMR Spectrum (600 MHz, CD<sub>3</sub>CN, 298K) of **TBTP•3PF<sub>6</sub>**.

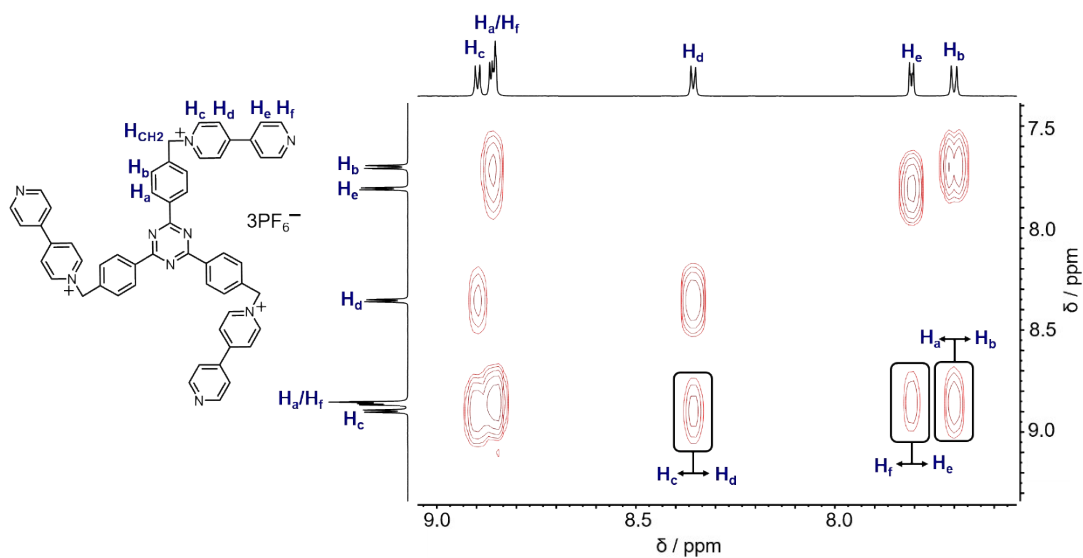

**Figure S2.** Partial <sup>1</sup>H–<sup>1</sup>H Gradient-selected double-quantum filtered phase-sensitive COSY spectrum of **TBTP•3PF<sub>6</sub>** (600 MHz, CD<sub>3</sub>CN, 298 K). Key correlation peaks are labeled in the spectrum.

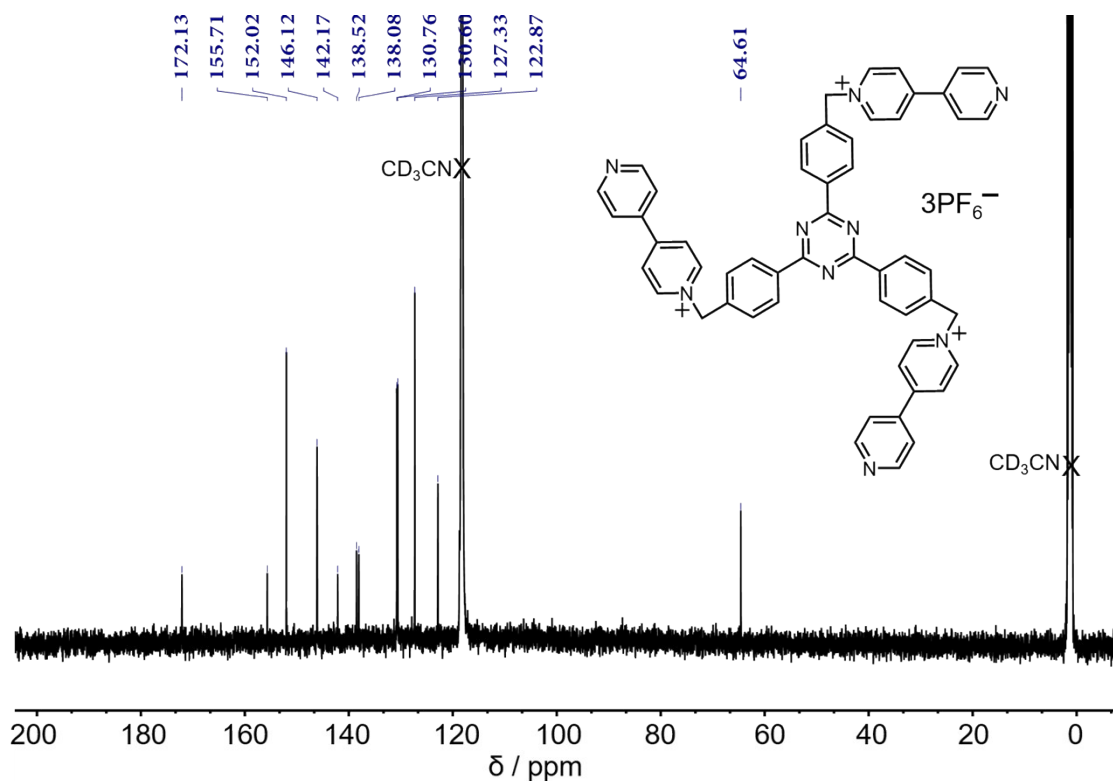

**Figure S3.** <sup>13</sup>C NMR Spectrum (125 MHz, CD<sub>3</sub>CN, 298 K) of **TBTP•3PF<sub>6</sub>**.

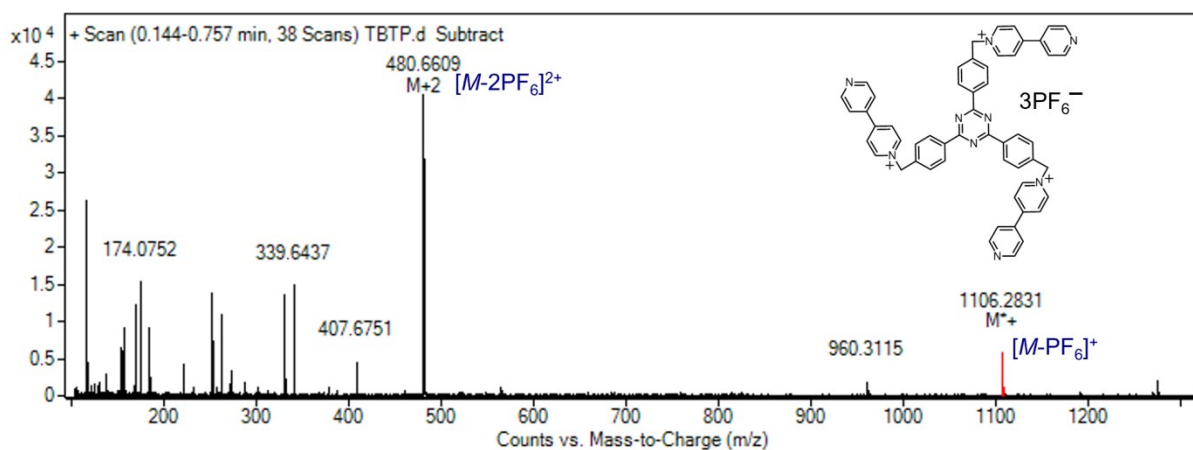

**Figure S4.** ESI-MS of **TBTP**•3PF<sub>6</sub>. The signals labelled in the spectrum correspond to molecular cations that contain one or two charges by losing one or two PF<sub>6</sub><sup>-</sup> counterions.

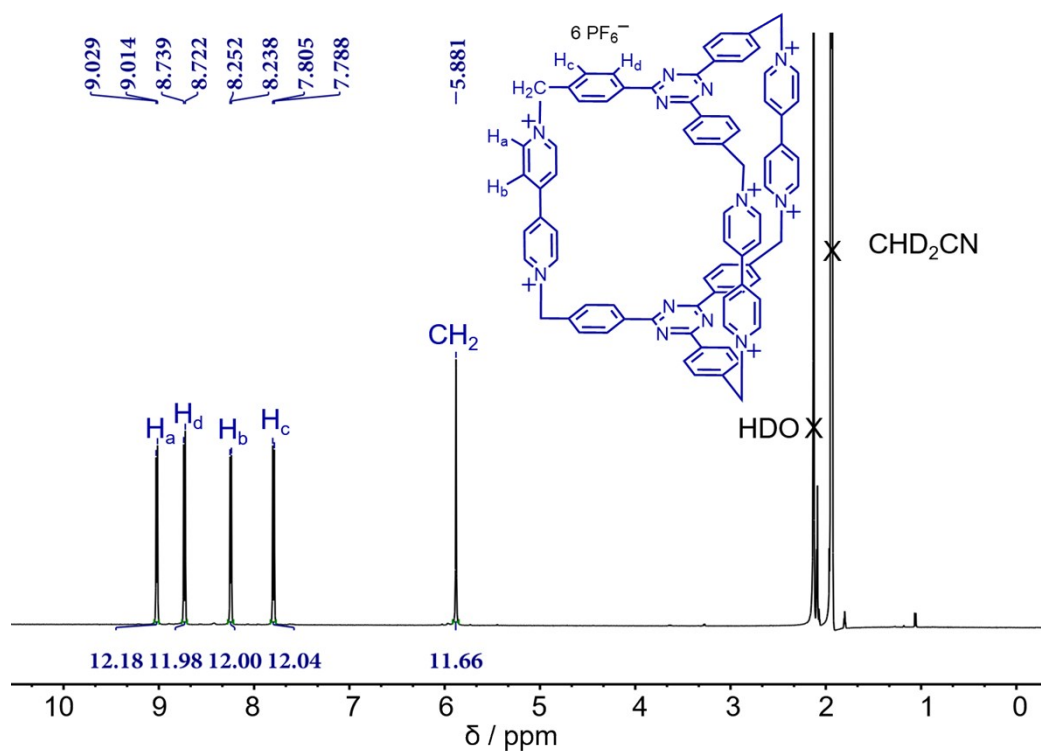

**Figure S5.** <sup>1</sup>H NMR Spectrum (500 MHz, CD<sub>3</sub>CN, 298 K) of **AzaEx<sup>2</sup>Cage**•6PF<sub>6</sub>.



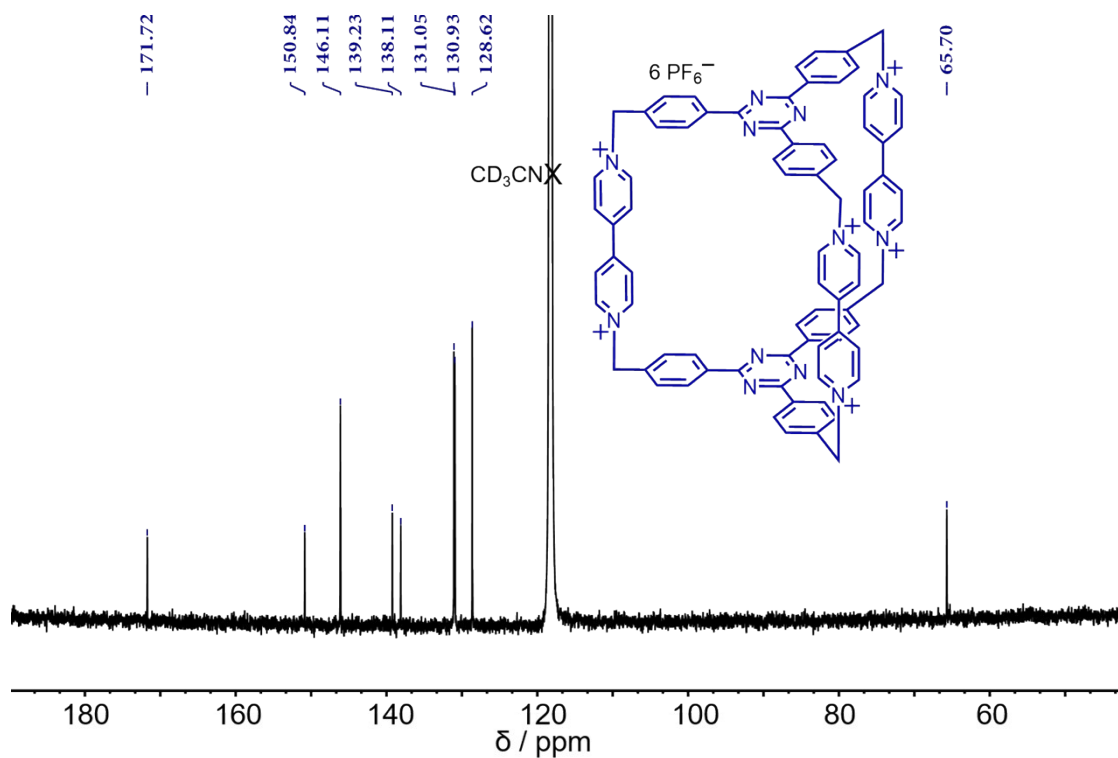

**Figure S6.**  $^{13}\text{C}$  NMR Spectrum (125 MHz,  $\text{CD}_3\text{CN}$ , 298 K) of **AzaEx<sup>2</sup>Cage•6PF<sub>6</sub>**.

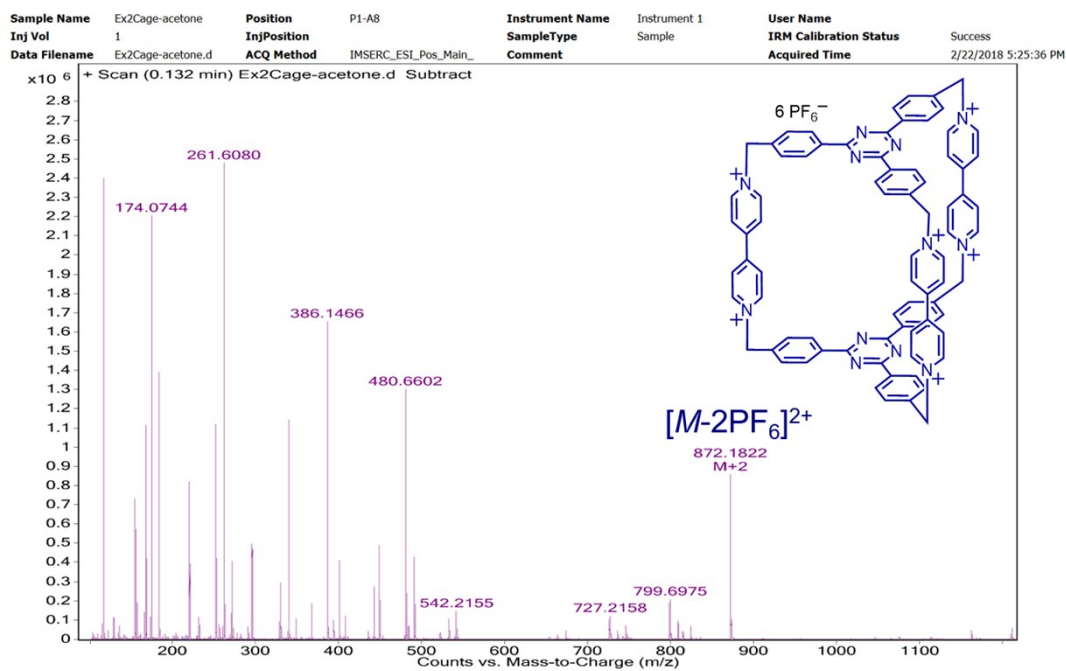

**Figure S7.** ESI-MS of **AzaEx<sup>2</sup>Cage•6PF<sub>6</sub>**. The signal labeled in the spectrum corresponds to molecular cation that contains two charges by losing two  $\text{PF}_6^-$  counterions.

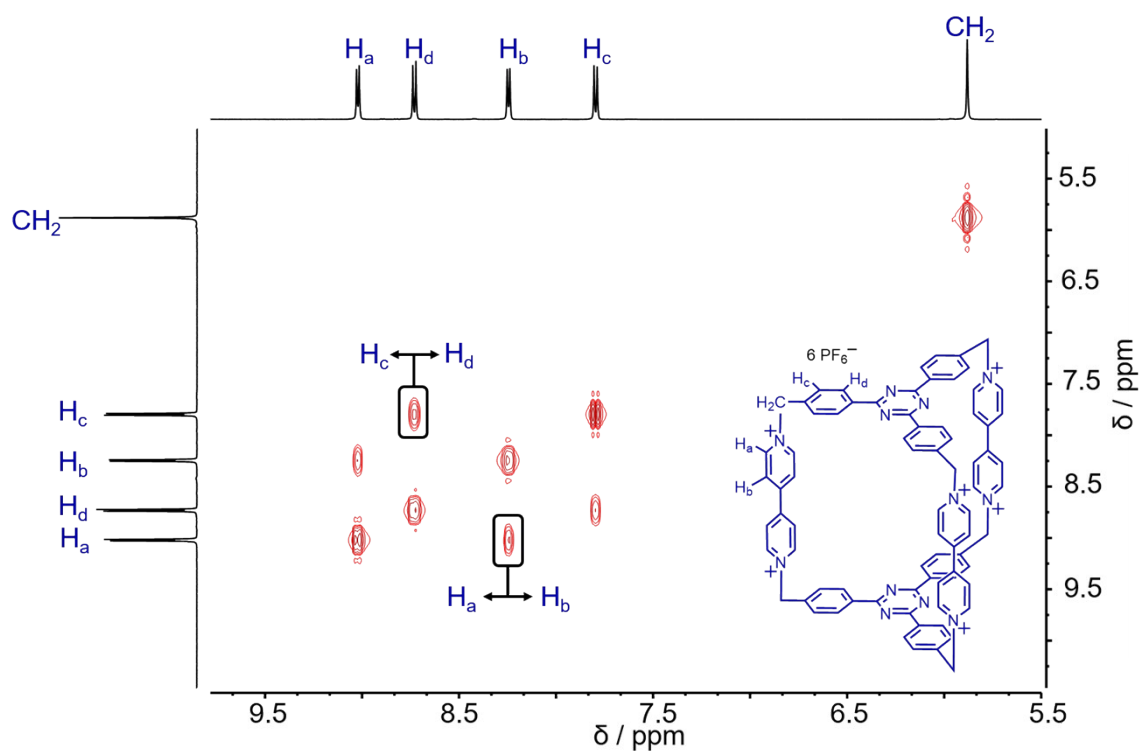

**Figure S8.**  $^1\text{H}$ - $^1\text{H}$  Gradient-selected double-quantum filtered phase-sensitive COSY spectrum of **AzaEx<sup>2</sup>Cage**• $6\text{PF}_6$  (500 MHz,  $\text{CD}_3\text{CN}$ , 298 K). Key correlation peaks are labeled in the spectrum.

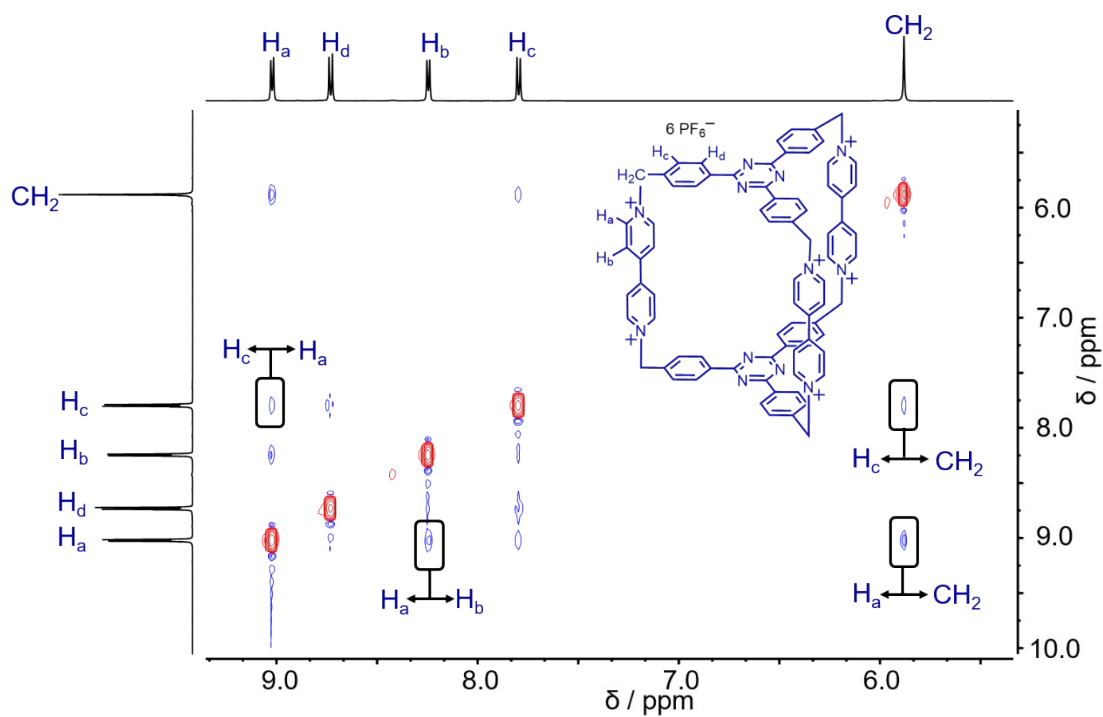

**Figure S9.**  $^1\text{H}$ - $^1\text{H}$  NOESY spectrum of **AzaEx<sup>2</sup>Cage**• $6\text{PF}_6$  (500 MHz,  $\text{CD}_3\text{CN}$ , 298 K). Through-space proton couplings are labeled in the spectrum.

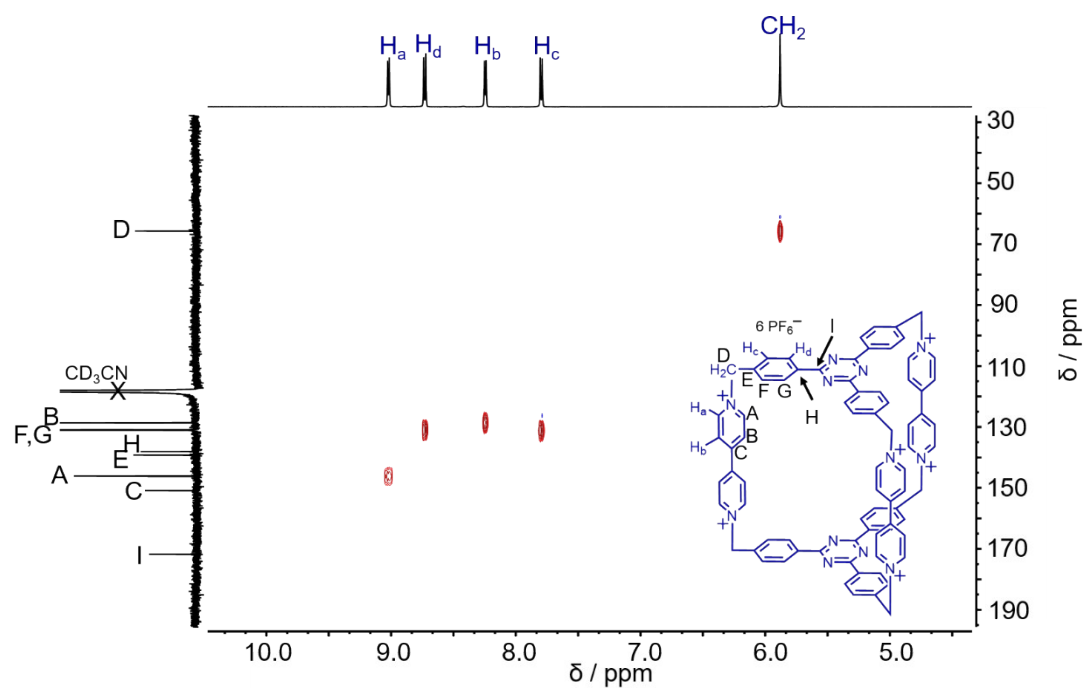

**Figure S10.** Part of the annotated  $^1\text{H}$ - $^{13}\text{C}$  Heteronuclear Single Quantum Coherence (HSQC) spectrum (125 MHz,  $\text{CD}_3\text{CN}$ , 298 K) of **AzaEx<sup>2</sup>Cage•6PF<sub>6</sub>**.

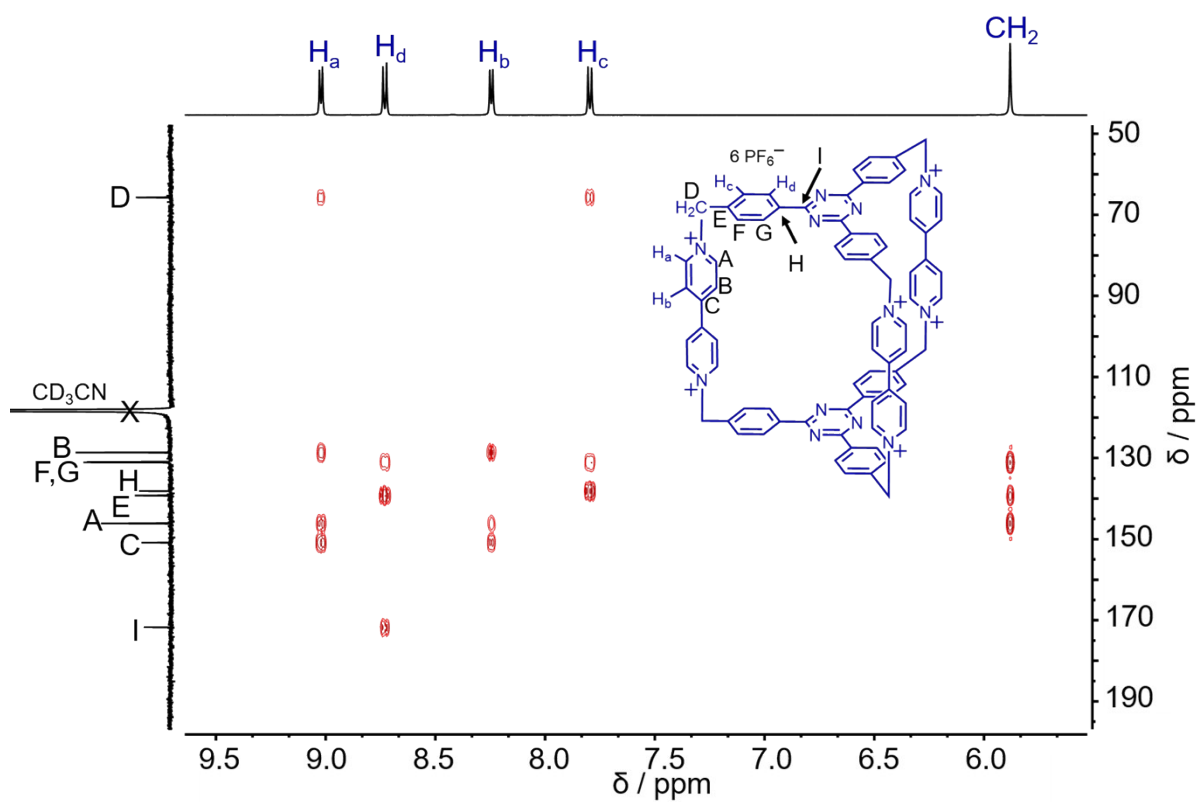

**Figure S11.** Part of the annotated  $^1\text{H}$  -  $^{13}\text{C}$  Heteronuclear Multiple Bond Coherence (HMBC) spectrum (125 MHz,  $\text{CD}_3\text{CN}$ , 298 K) of **AzaEx<sup>2</sup>Cage•6PF<sub>6</sub>**.

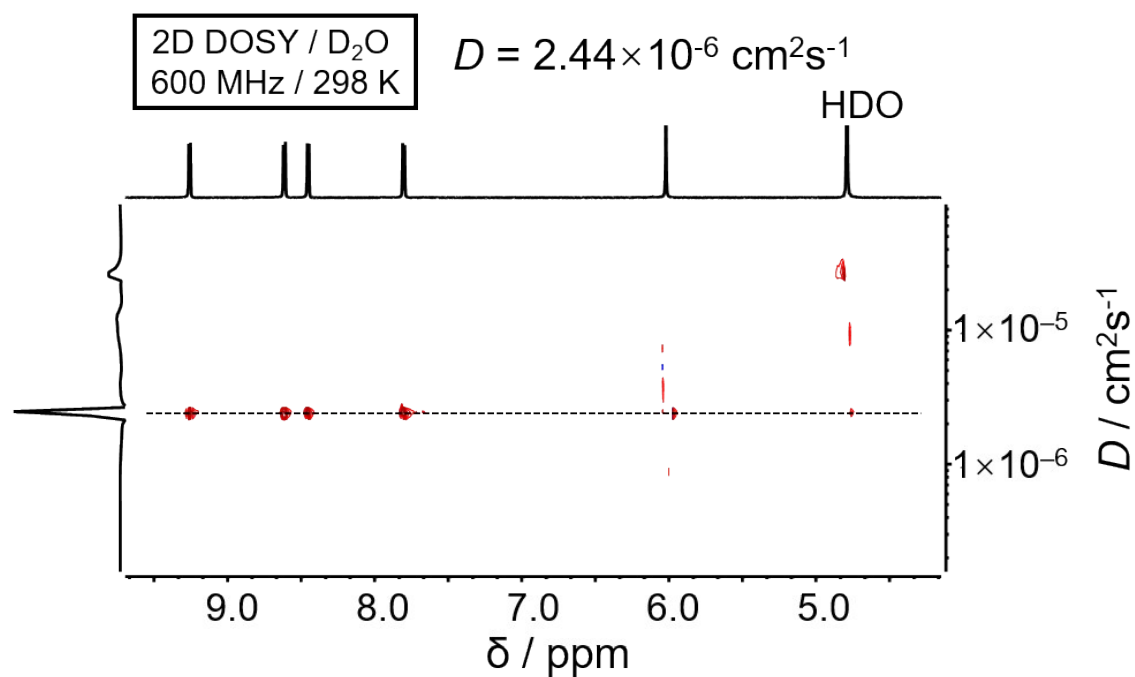

Figure S12. 2D DOSY spectrum (600 MHz, D<sub>2</sub>O, 298 K) of **AzaEx<sup>2</sup>Cage•6Cl**.

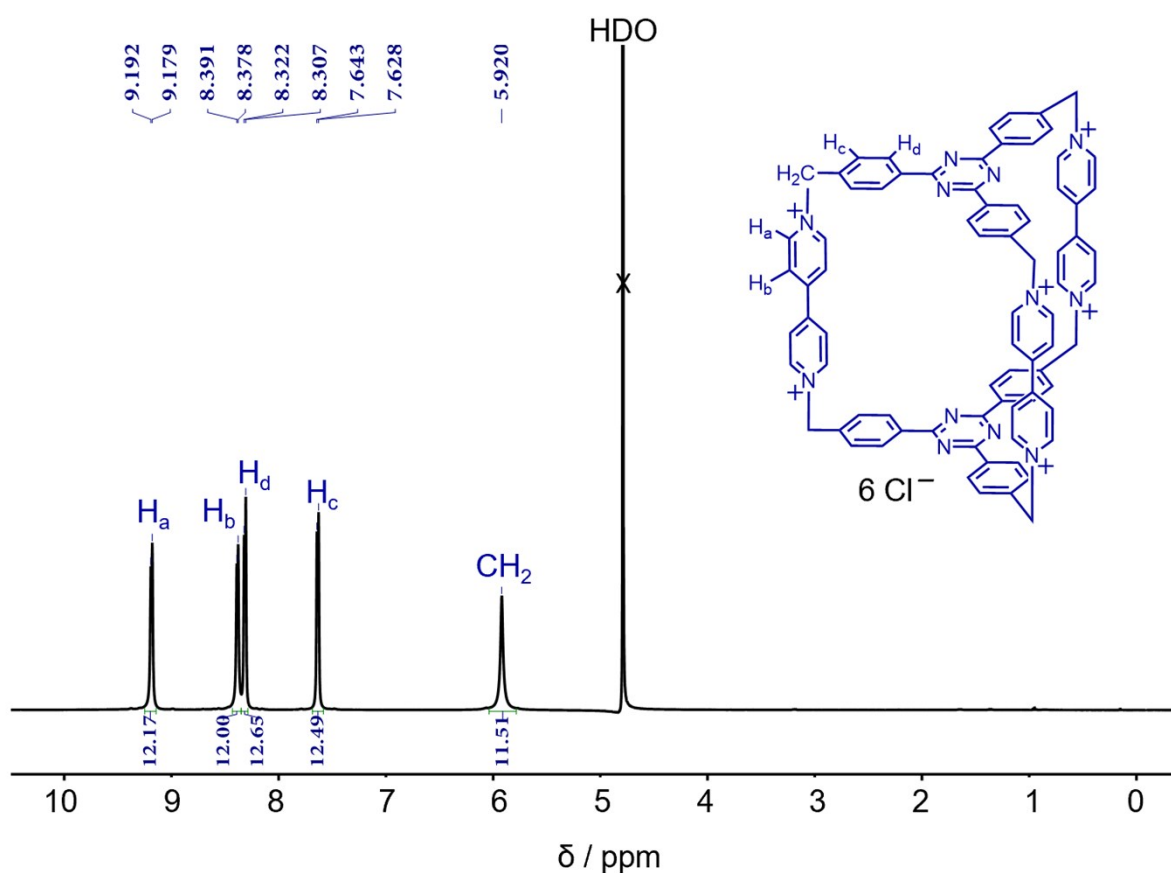

Figure S13. <sup>1</sup>H NMR Spectrum (500 MHz, D<sub>2</sub>O, 298 K) of **AzaEx<sup>2</sup>Cage•6Cl**.

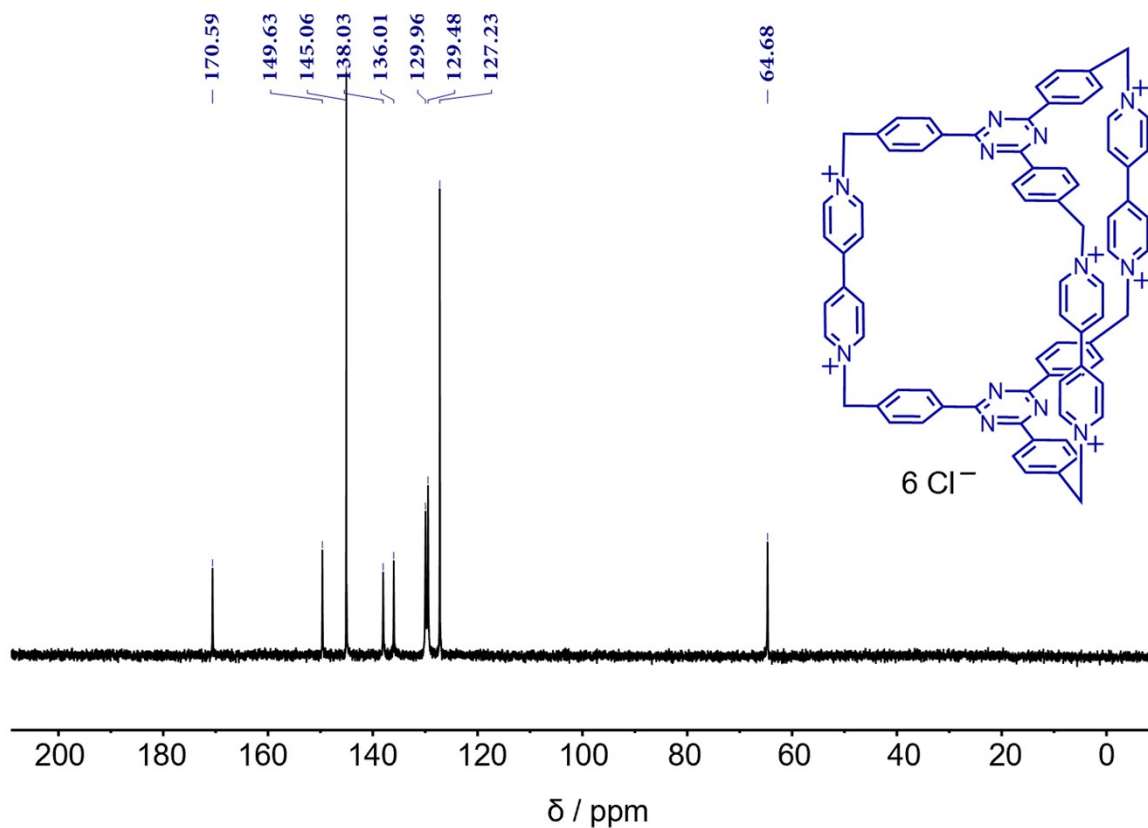

**Figure S14.**  $^{13}\text{C}$  NMR Spectrum (125 MHz,  $\text{D}_2\text{O}$ , 298 K) of **AzaEx $^2$ Cage•6Cl**.

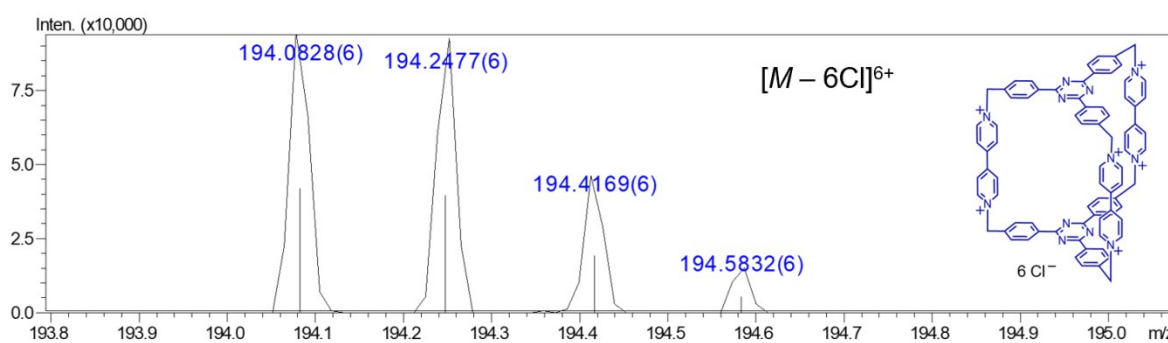

**Figure S15.** ESI-MS of **AzaEx $^2$ Cage•6Cl**. The signal labeled in the spectrum corresponds to molecular cation that contains two charges by losing six  $\text{Cl}^-$  counterions.

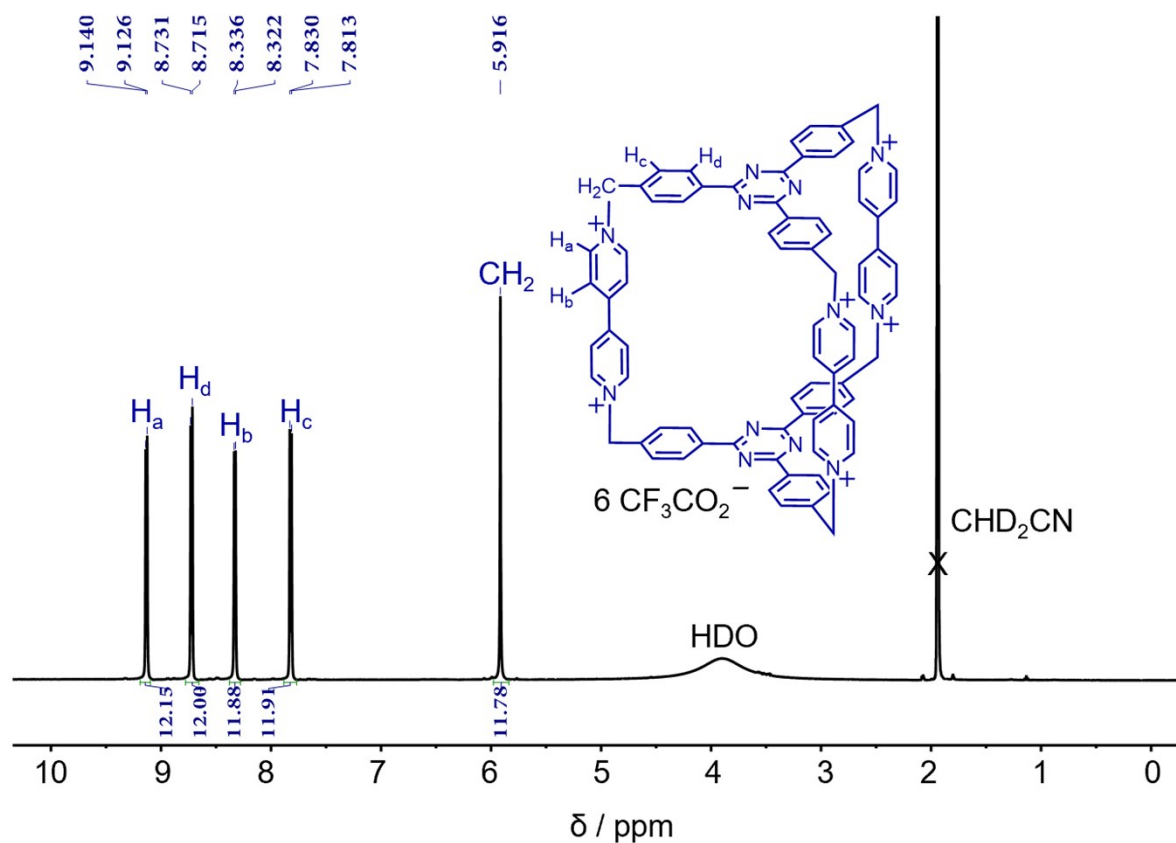

**Figure S16.**  $^1\text{H}$  NMR Spectrum (500 MHz,  $\text{CD}_3\text{CN}$ , 298 K) of **AzaEx<sup>2</sup>Cage**• $6\text{CF}_3\text{CO}_2$ .

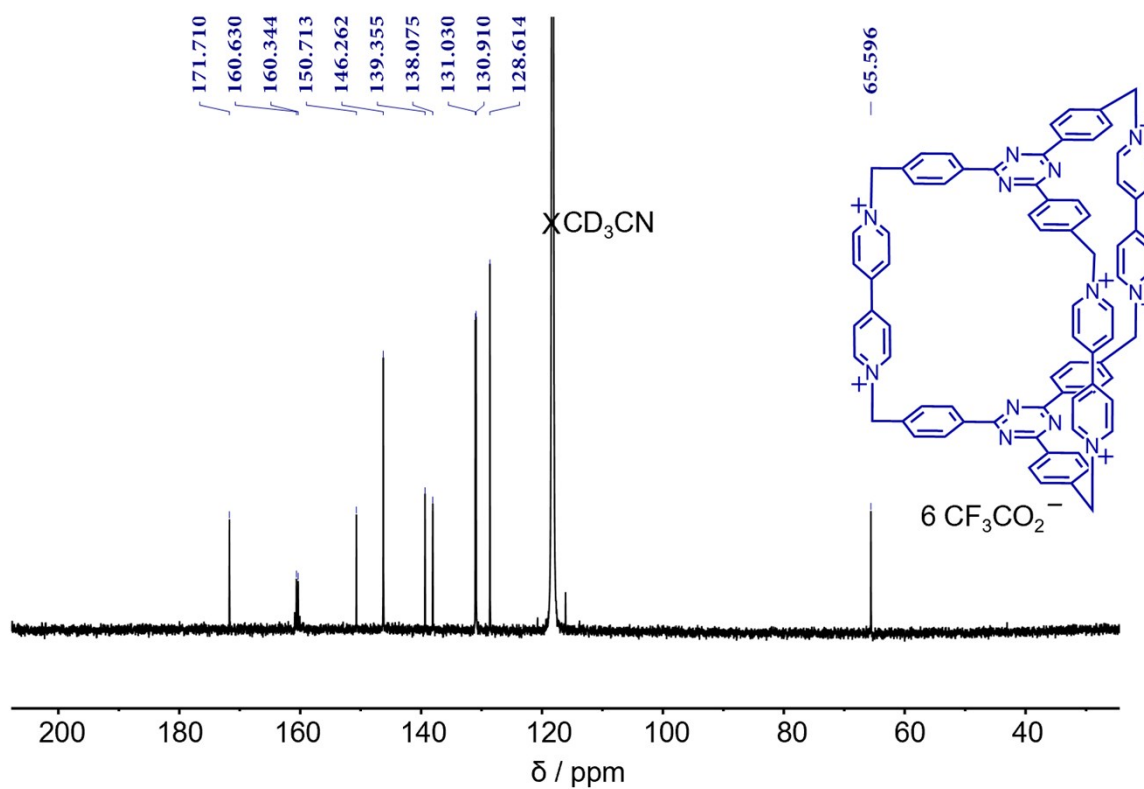

**Figure S17.**  $^{13}\text{C}$  NMR Spectrum (125 MHz,  $\text{CD}_3\text{CN}$ , 298 K) of **AzaEx<sup>2</sup>Cage**• $6\text{CF}_3\text{CO}_2$ .

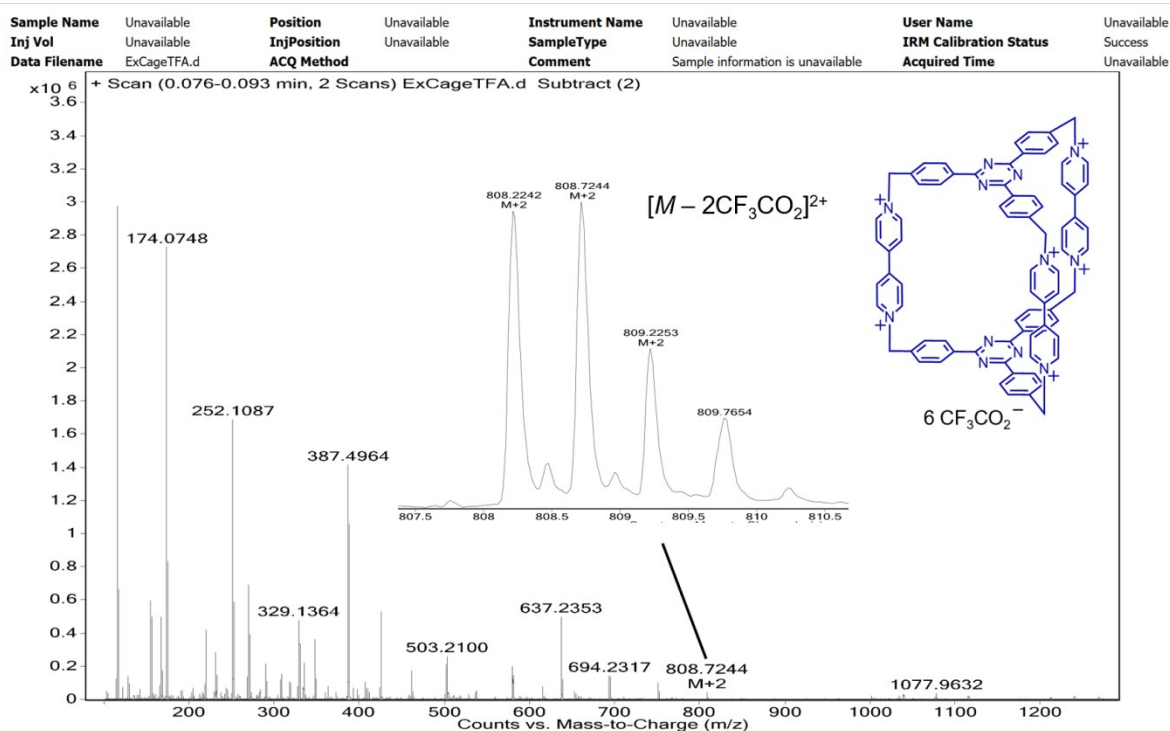

**Figure S18.** ESI-MS of **AzaEx<sup>2</sup>Cage•6CF<sub>3</sub>CO<sub>2</sub>**. The signal labeled in the spectrum corresponds to molecular cation that contains two charges by losing two CF<sub>3</sub>CO<sub>2</sub><sup>-</sup> counterions.

#### 4.Binding Studies and Characterization of Host-Guest Complex

##### General experimental procedure

A solution of **AzaEx<sup>2</sup>Cage•6PF<sub>6</sub>** in CD<sub>3</sub>CN (approximately  $1.0 \times 10^{-3}$  M, 1 mL) was separated equally into two portions. An excess of solid-state guest (typically 20-50 equivalents relative to host **AzaEx<sup>2</sup>Cage•6PF<sub>6</sub>**) was added to the first portion of the **AzaEx<sup>2</sup>Cage•6PF<sub>6</sub>** solution. This host-guest mixture solution was used to titrate the second portion solution of **AzaEx<sup>2</sup>Cage•6PF<sub>6</sub>**, whose <sup>1</sup>H NMR spectra were recorded before and after the addition of the former mixture solution. All the spectra were recorded after shaking the NMR tube thoroughly, in order to allow the host-guest systems to reach the equilibrium. The upfield or downfield shifts ( $\Delta\delta$ ) of the corresponding proton resonances in **AzaEx<sup>2</sup>Cage•6PF<sub>6</sub>** upon addition of different amount of guest were recorded and used to fit to a 1:1 or 1:2 binding models using Bindfit<sup>2</sup>.

# 1) Binding behavior between PCA and AzaEx<sup>2</sup>Cage•6PF<sub>6</sub>

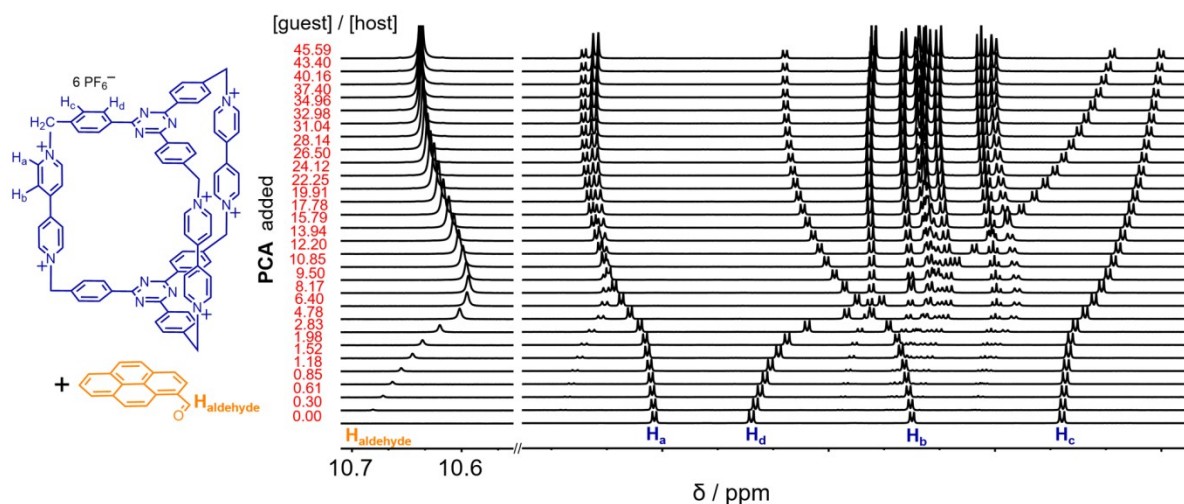

**Figure S19.** <sup>1</sup>H NMR spectra (600 MHz, 298 K) of **AzaEx<sup>2</sup>Cage•6PF<sub>6</sub>** ( $9.04 \times 10^{-4}$  M) in CD<sub>3</sub>CN after adding different amount (from 0 to 46 equiv) of 1-pyrenecarboxaldehyde (**PCA**) relatively to **AzaEx<sup>2</sup>Cage•6PF<sub>6</sub>**.

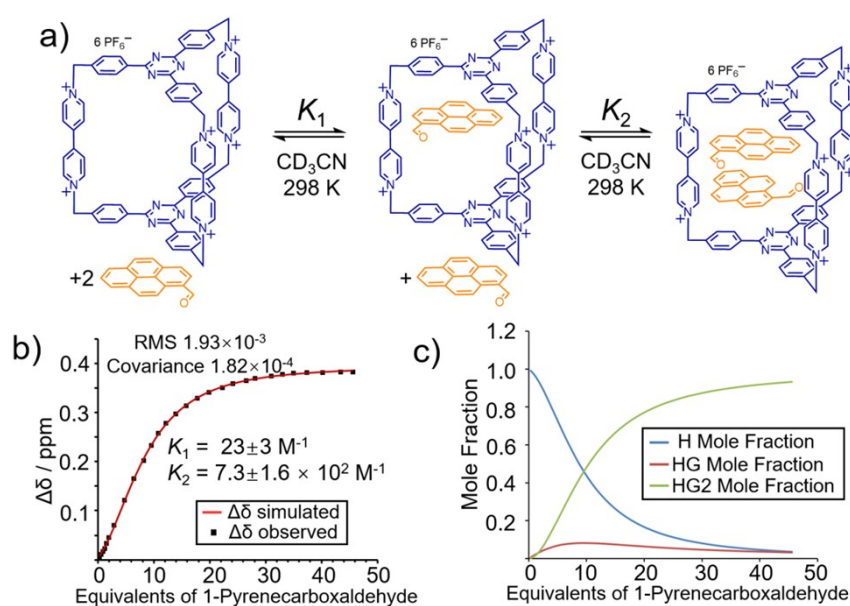

**Figure S20.** a) The 1:2 binding behavior between **AzaEx<sup>2</sup>Cage•6PF<sub>6</sub>** and **PCA**. b) Observed (dot) and calculated (red trace) binding curves of the downfield shifts of the resonance of proton H<sub>b</sub> in **AzaEx<sup>2</sup>Cage•6PF<sub>6</sub>** versus [PCA]/[AzaEx<sup>2</sup>Cage•6PF<sub>6</sub>]. By using a 2:1 binding model, the binding constants could be determined. c) Mole fraction based on the fitting results indicating that the concentration of the “free” host **AzaEx<sup>2</sup>Cage<sup>6+</sup>** undergoes continuous decrease (blue trace), while the concentration of **(PCA)<sub>2</sub>C•AzaEx<sup>2</sup>Cage<sup>6+</sup>** complex undergoes continuous increase (green trace). The half-occupied complex, namely **(PCA)C•AzaEx<sup>2</sup>Cage<sup>6+</sup>** undergo concentration increase in the beginning of the titration, followed by decrease in concentration (red trace).



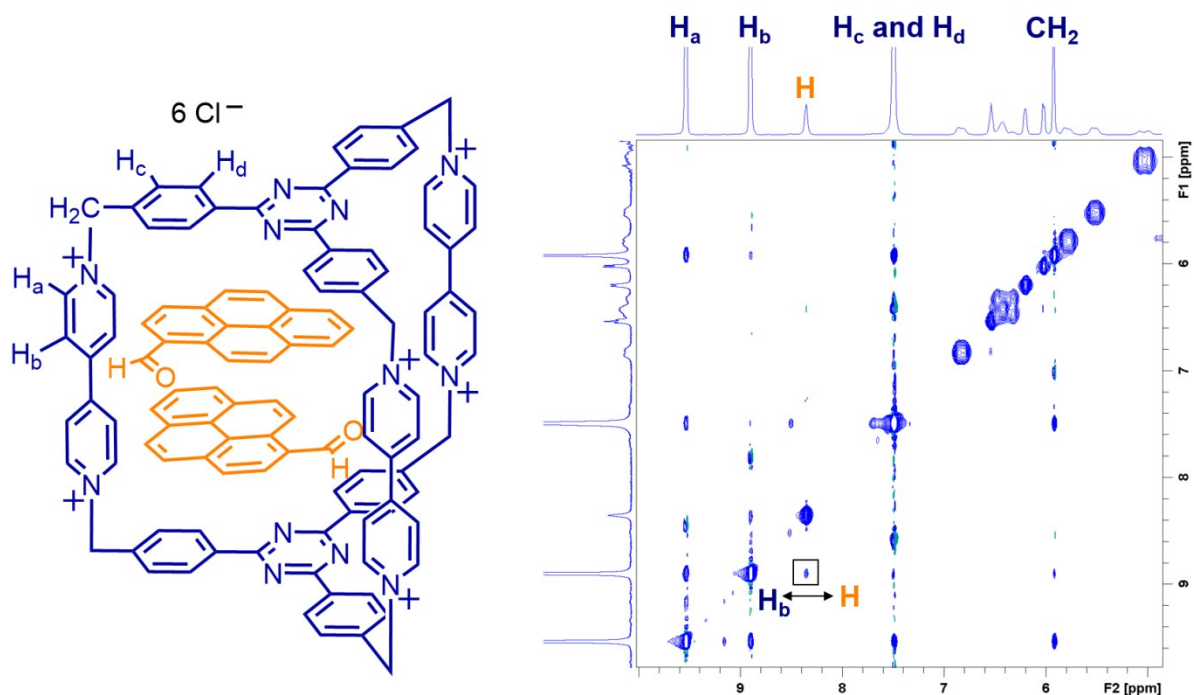

**Figure S21.** 2D NOESY spectrum (298 K, 500 MHz) of  $(\text{PCA})_2 \subset \text{AzaEx}^2\text{Cage} \cdot 6\text{Cl}^-$  in  $\text{D}_2\text{O}$ . A NOESY cross-peak between the formyl proton in the guest and  $\text{H}_b$  in the host was observed and labeled in the spectrum.

## 2) Binding behavior between pyrene and $\text{AzaEx}^2\text{Cage} \cdot 6\text{PF}_6^-$

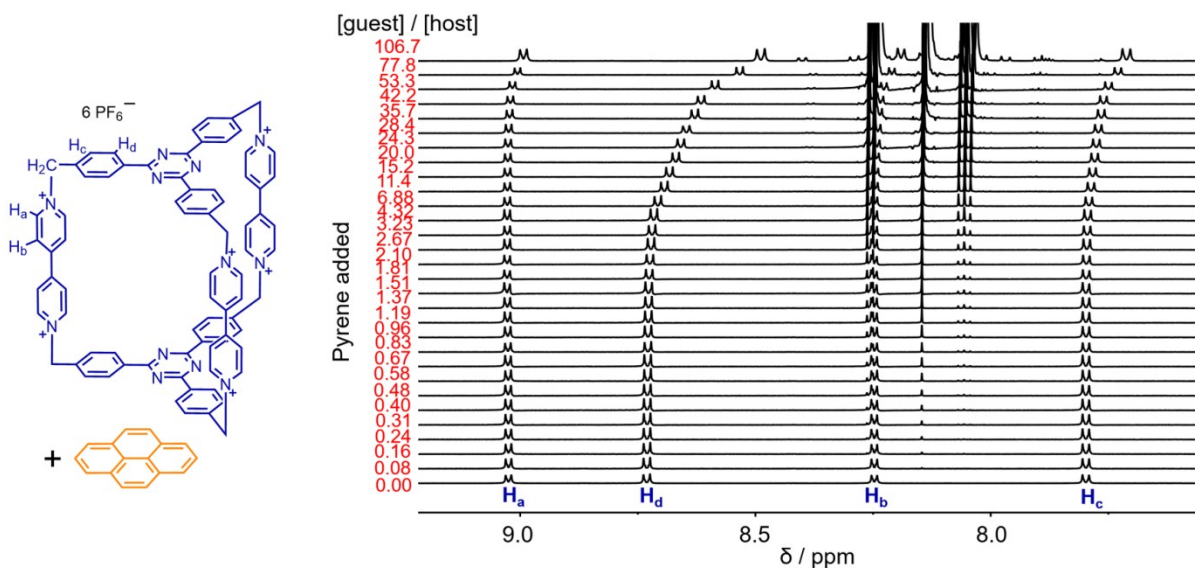

**Figure S22.**  $^1\text{H}$  NMR spectra (500 MHz, 298 K) of  $\text{AzaEx}^2\text{Cage} \cdot 6\text{PF}_6^-$  ( $0.49 \times 10^{-3}$  M) in  $\text{CD}_3\text{CN}$  after adding different amount (from 0 to 107 equiv) of pyrene relative to  $\text{AzaEx}^2\text{Cage} \cdot 6\text{PF}_6^-$ . These spectra demonstrate that addition of pyrene leads to upfield shifts of the resonances of protons  $\text{H}_c$  and  $\text{H}_d$  in the phenyl residues of the host, while the protons  $\text{H}_a$  and  $\text{H}_b$  undergo very little shift, indicating that pyrene guest prefers to interact with the platforms of the cage.

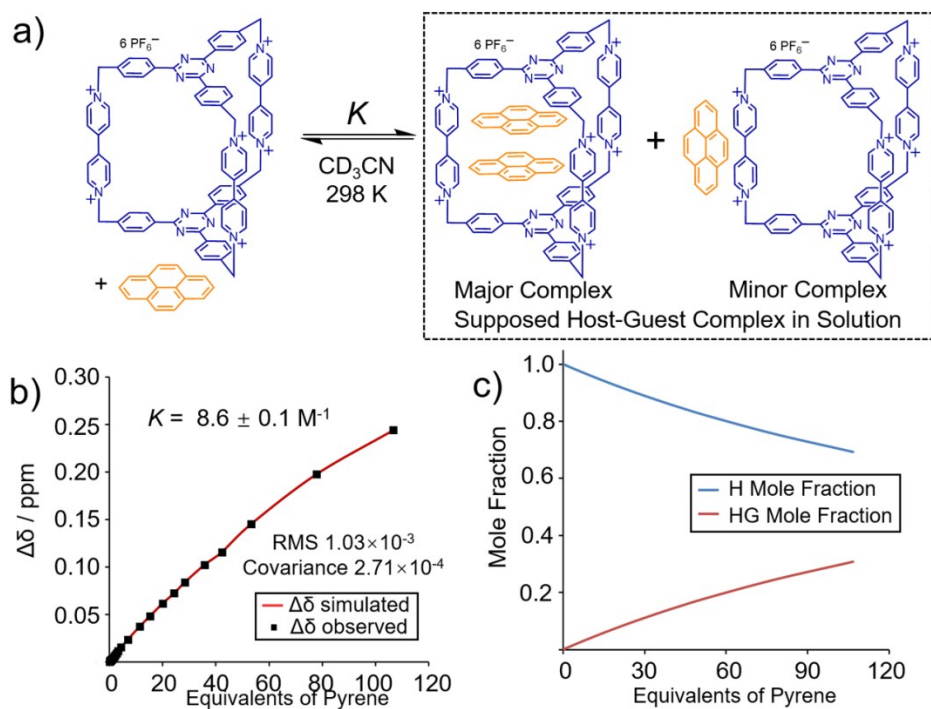

**Figure S23.** a) The binding behavior between **AzaEx<sup>2</sup>Cage**·6PF<sub>6</sub><sup>-</sup> and pyrene. b) Observed (dot) and calculated (red trace) binding curves of the upfield shifts of the resonance of proton H<sub>d</sub> in **AzaEx<sup>2</sup>Cage**·6PF<sub>6</sub><sup>-</sup> versus [pyrene]/[**AzaEx<sup>2</sup>Cage**·6PF<sub>6</sub><sup>-</sup>]. By using a 1:1 binding model, the binding constant could be determined. c) Mole fraction based on the fitting results indicating that the concentration of the “free” host **AzaEx<sup>2</sup>Cage**<sup>6+</sup> undergoes continuous decrease (blue trace), while the concentration of complexes including either (pyrene)<sub>2</sub>·**AzaEx<sup>2</sup>Cage**<sup>6+</sup> or pyrene·**AzaEx<sup>2</sup>Cage**<sup>6+</sup> undergoes continuous increase (red trace).

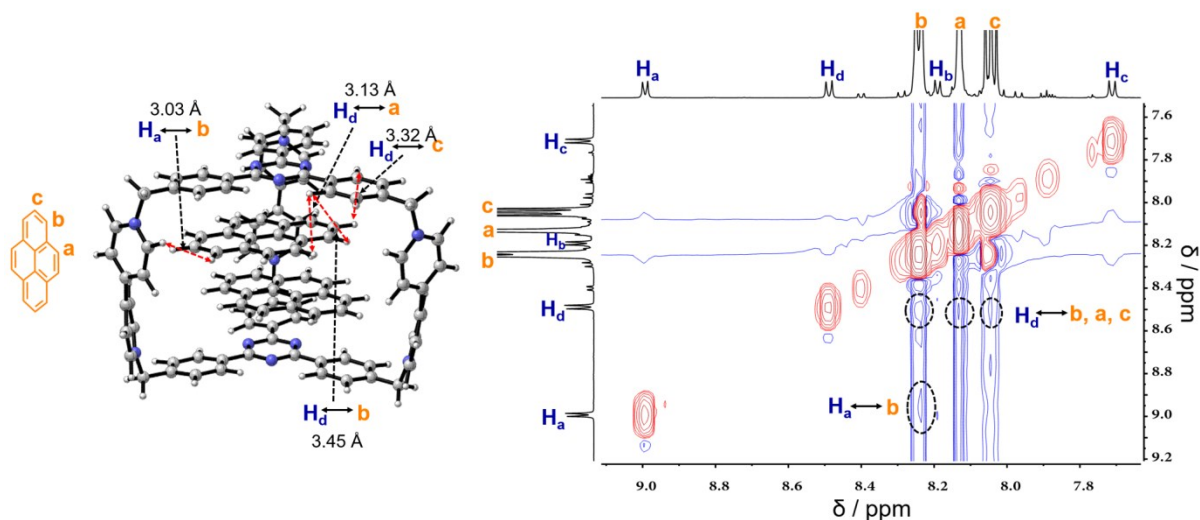

**Figure S24.** 2D NOESY spectrum (298 K, 500 MHz) of **AzaEx<sup>2</sup>Cage**·6PF<sub>6</sub><sup>-</sup> ( $0.49 \times 10^{-3} \text{ M}$ ) in  $\text{CD}_3\text{CN}$  after adding 107 equiv pyrene.

### 3) Binding behavior between **BH4EN** and **AzaEx<sup>2</sup>Cage**·6PF<sub>6</sub>

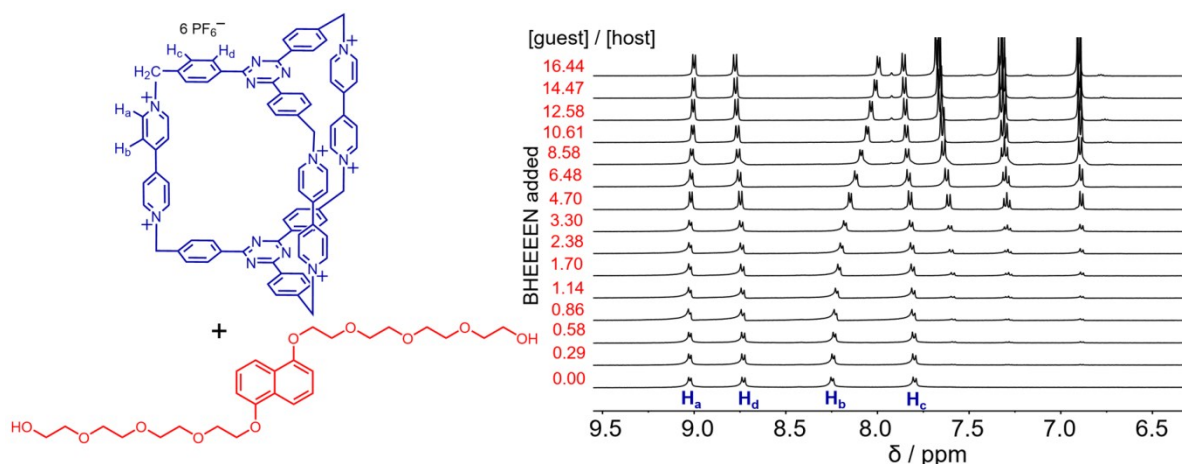

**Figure S25.** <sup>1</sup>H NMR spectra (500 MHz, 298 K) of **AzaEx<sup>2</sup>Cage**·6PF<sub>6</sub> ( $1.04 \times 10^{-3}$  M) in CD<sub>3</sub>CN after adding different amount (from 0 to 16 equiv) of **BH4EN** relative to **AzaEx<sup>2</sup>Cage**·6PF<sub>6</sub>. These spectra demonstrate that addition of **BH4EN** leads to upfield shifts of the resonance of protons H<sub>b</sub> in the pillars of the host, while the protons H<sub>c</sub> and H<sub>d</sub> undergo very little shift, indicating that **BH4EN** guest prefers to interact with the 4,4'-bipyridinium (**BIPY<sup>2+</sup>**) pillars of the cage.

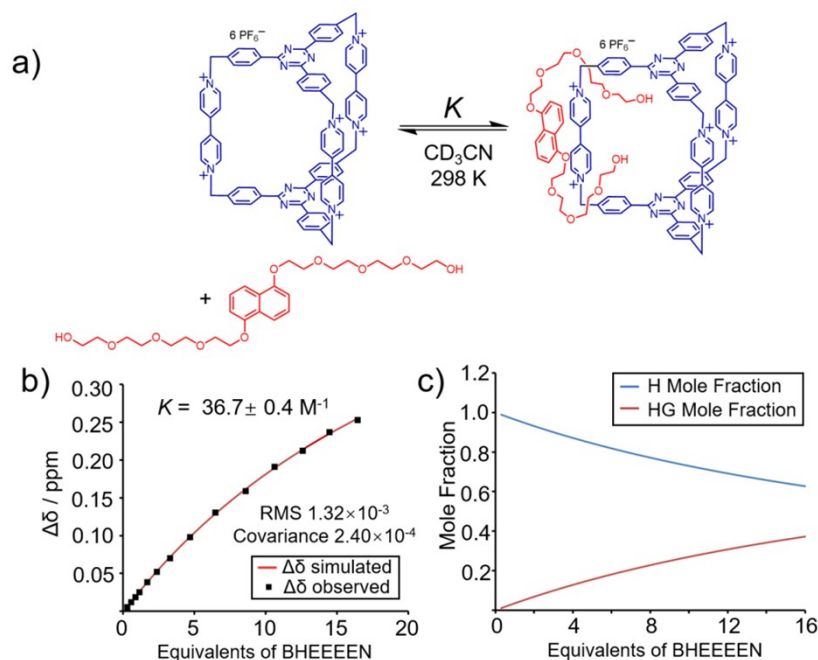

**Figure S26.** a) The binding behavior between **AzaEx<sup>2</sup>Cage**·6PF<sub>6</sub> and **BH4EN**. b) Observed (dot) and calculated (red trace) binding curves of the upfield shifts of the resonance of proton H<sub>b</sub> in **AzaEx<sup>2</sup>Cage**·6PF<sub>6</sub> versus [BH4EN] / [AzaEx<sup>2</sup>Cage]·6PF<sub>6</sub>. By using a 1:1 binding model, the binding constant could be determined. c) Mole fraction based on the fitting results indicating that the concentration of the “free” host **AzaEx<sup>2</sup>Cage**<sup>6+</sup> undergoes continuous decrease (blue trace), while the concentration of complex undergoes continuous increase (red trace).

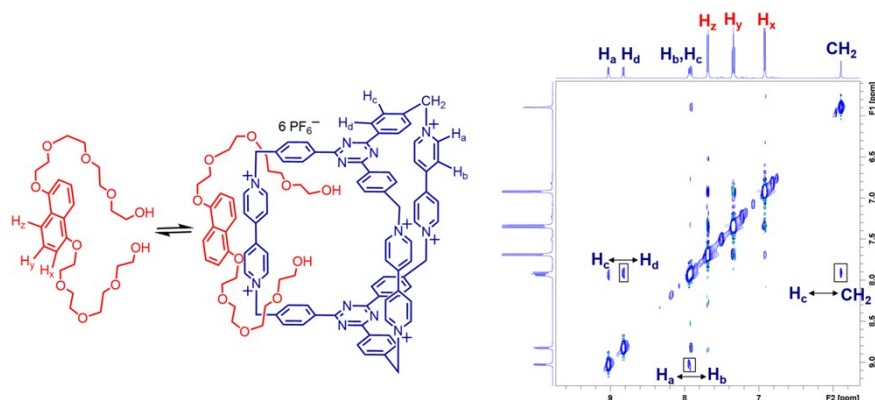

**Figure S27.** 2D NOESY spectrum (298 K, 500 MHz) of **BH4EN•AzaEx<sup>2</sup>Cage•6PF<sub>6</sub>** in CD<sub>3</sub>CN. NOESY cross-peaks between H<sub>c</sub> and H<sub>d</sub>, H<sub>a</sub> and H<sub>b</sub>, as well as H<sub>c</sub> and CH<sub>2</sub> were observed and labeled in the spectrum. However, no NOESY cross-peaks between host and guest were observed, indicating that the complexation might occur in a peripheral manner.

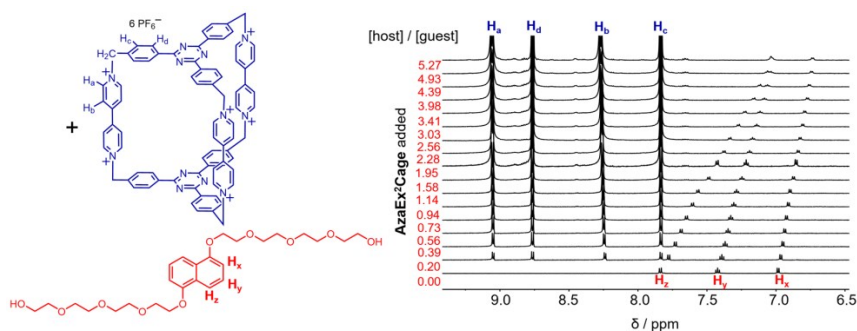

**Figure S28.** <sup>1</sup>H NMR spectra (500 MHz, 298 K) of **BH4EN** ( $1.13 \times 10^{-3}$  M) in CD<sub>3</sub>CN after adding different amount (from 0 to 6 equiv) of **AzaEx<sup>2</sup>Cage•6PF<sub>6</sub>** relative to **BH4EN**.

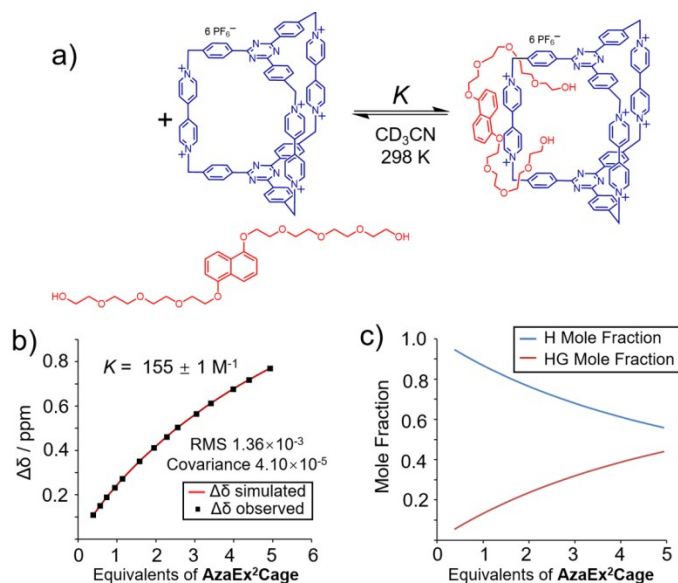

**Figure S29.** a) The binding behavior between **BH4EN** and **AzaEx<sup>2</sup>Cage•6PF<sub>6</sub>**. b) Observed (dot) and calculated (red trace) binding curves of the upfield shifts of the resonance of proton H<sub>2</sub> in **BH4EN** versus  $[\text{BH4EN}] / [\text{AzaEx}^2\text{Cage}\cdot 6\text{PF}_6]$ . By using a

1:1 binding model, the binding constant could be determined. c) The curves of mole fractions of the **BH4EN** (blue trace) and the complex (red trace) versus the amount of cage **AzaEx<sup>2</sup>Cage•6PF<sub>6</sub>** added into the solution.

4) Binding behavior between **PCA** and **AzaEx<sup>2</sup>Cage•6PF<sub>6</sub>** in the presence of **BH4EN**.

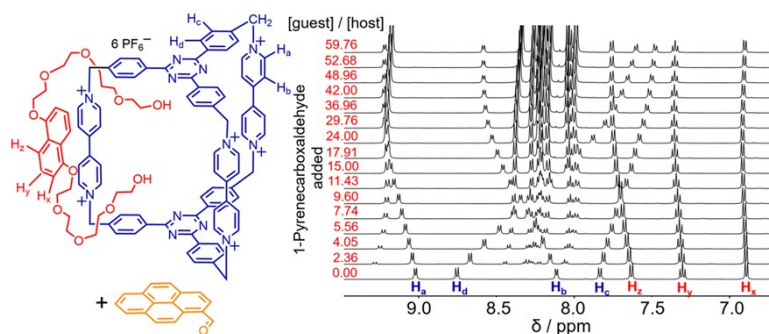

**Figure S30.** <sup>1</sup>H NMR spectra (500 MHz, 298 K) recorded after adding different amount of **PCA** (from 0 to 60 equiv relative to **AzaEx<sup>2</sup>Cage•6PF<sub>6</sub>**) into **AzaEx<sup>2</sup>Cage•6PF<sub>6</sub>** ( $1.00 \times 10^{-3}$  M) in the presence of **BH4EN** ( $7.81 \times 10^{-3}$  M) in CD<sub>3</sub>CN.

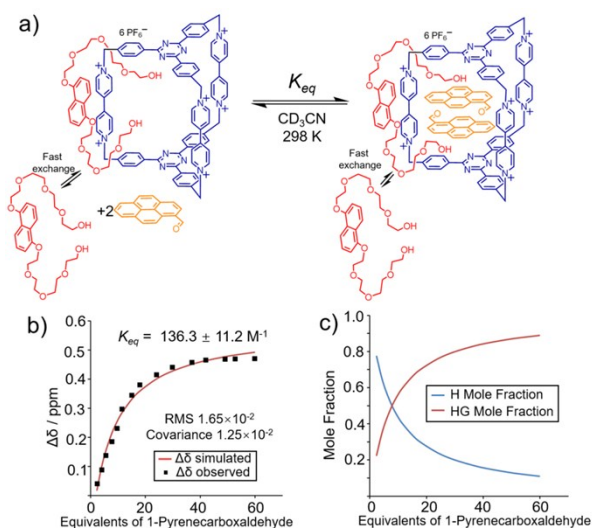

**Figure S31.** a) The binding behavior of a peripheral complex **BH4EN•AzaEx<sup>2</sup>Cage•6PF<sub>6</sub>** to accommodate two **PCA** guests. b) Observed (dot) and calculated (red trace) binding curves of the downfield shifts of the resonance of proton H<sub>b</sub> in **AzaEx<sup>2</sup>Cage•6PF<sub>6</sub>** versus [PCA]/[AzaEx<sup>2</sup>Cage•6PF<sub>6</sub>] in the presence of 7.8 equiv **BH4EN** (relative to **AzaEx<sup>2</sup>Cage•6PF<sub>6</sub>**). The trial to employ a 2:1 binding model to calculate the binding constants  $K_1$  and  $K_2$  is unsuccessful. By using a 1:1 binding model, the binding constants ( $136.3 \pm 11.2$  M<sup>-1</sup>) could be determined, which is more or less the same as that of **(PCA)<sub>2</sub>•AzaEx<sup>2</sup>Cage<sup>6+</sup>** complex calculated by using a 1:1 binding model. c) Mole fraction based on the fitting results indicating that the concentration of **BH4EN•AzaEx<sup>2</sup>Cage•6PF<sub>6</sub>** undergoes continuous decrease (blue trace), while the concentration of complex **BH4EN•(PCA)<sub>2</sub>•AzaEx<sup>2</sup>Cage•6PF<sub>6</sub>** undergoes continuous increase (red trace).

5) Binding behavior between **BH4EN** and **AzaEx<sup>2</sup>Cage**·6PF<sub>6</sub> with **PCA**.

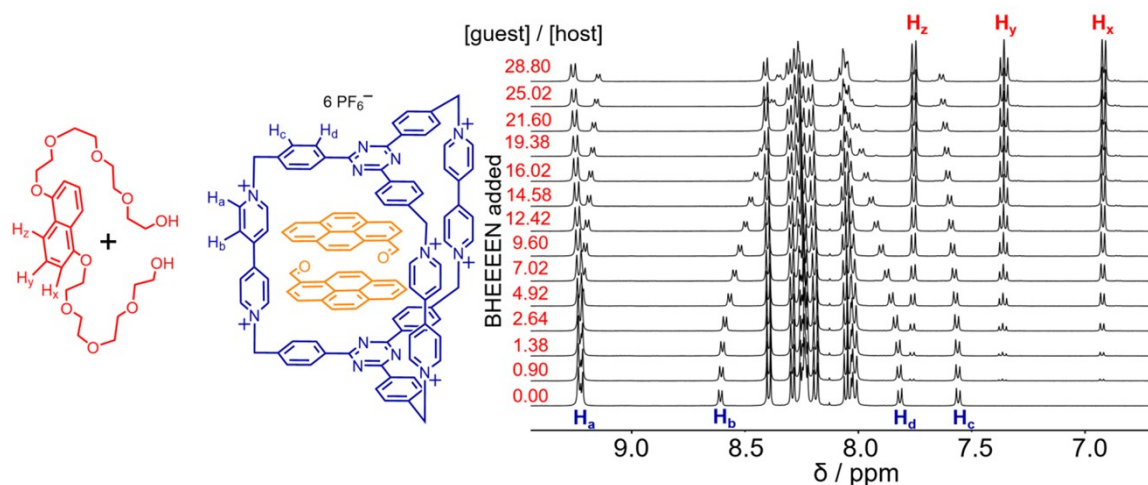

**Figure S32.** <sup>1</sup>H NMR spectra (500 MHz, 298 K) recorded after adding different amount of **BH4EN** (from 0 to 29 equiv relative to **AzaEx<sup>2</sup>Cage**·6PF<sub>6</sub>) into **AzaEx<sup>2</sup>Cage**·6PF<sub>6</sub> (0.83 × 10<sup>-3</sup> M) in the presence of **PCA** (2.21 × 10<sup>-2</sup> M) in CD<sub>3</sub>CN.

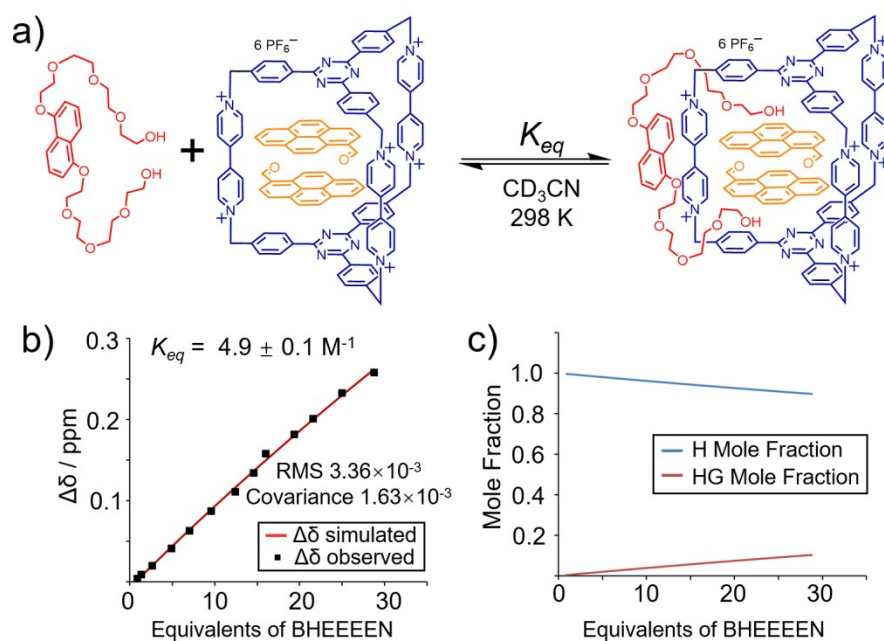

**Figure S33.** a) The binding behavior of an inclusion complex **(PCA)<sub>2</sub> ⊂ AzaEx<sup>2</sup>Cage**·6PF<sub>6</sub> to bind **BH4EN** in a peripheral manner. b) Observed (dot) and calculated (red trace) binding curves of the upfield shifts of the resonance of proton H<sub>b</sub> in **AzaEx<sup>2</sup>Cage**·6PF<sub>6</sub> versus **[BH4EN]/[AzaEx<sup>2</sup>Cage**·6PF<sub>6</sub>] in the presence of 26.6 equiv **PCA** (relative to **AzaEx<sup>2</sup>Cage**·6PF<sub>6</sub>). By using a 1:1 binding model, the binding constants could be determined. c) Mole fraction based on the fitting results indicating that the concentration of **(PCA)<sub>2</sub> ⊂ AzaEx<sup>2</sup>Cage**·6PF<sub>6</sub> undergoes continuous decrease (blue trace), while the concentration of complex **BH4EN**·**(PCA)<sub>2</sub> ⊂ AzaEx<sup>2</sup>Cage**·6PF<sub>6</sub> undergoes continuous increase (red trace).

6) Binding behavior between **BH4EN** and **MV•2PF<sub>6</sub>**

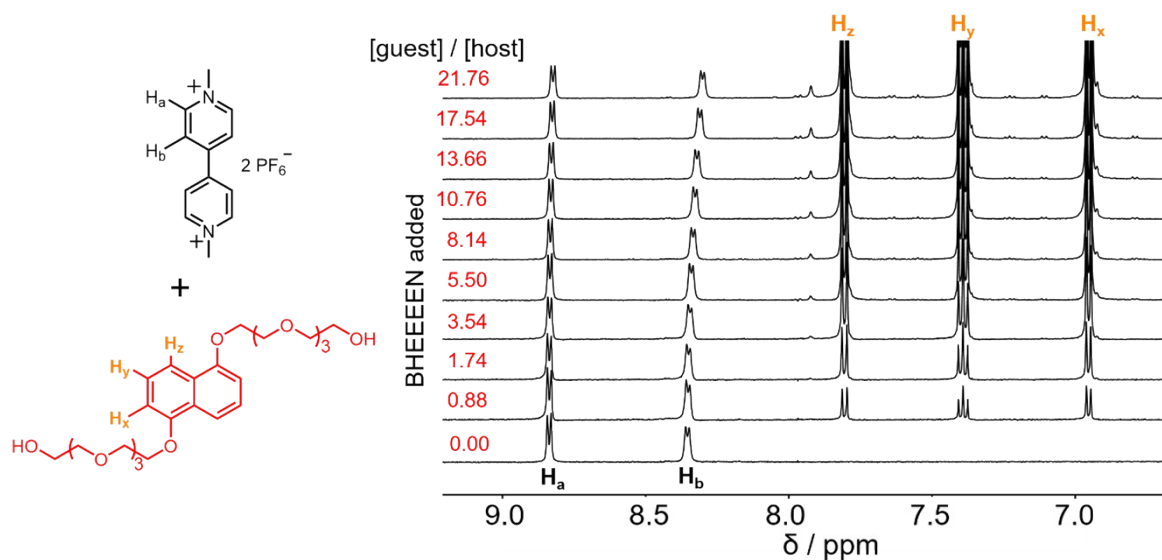

**Figure S34.** <sup>1</sup>H NMR spectra (500 MHz, 298 K) recorded after adding different amount of **BH4EN** (from 0 to 22 equiv relative to **MV•2PF<sub>6</sub>**) into **MV•2PF<sub>6</sub>** ( $6.19 \times 10^{-3}$  M) in  $\text{CD}_3\text{CN}$ .

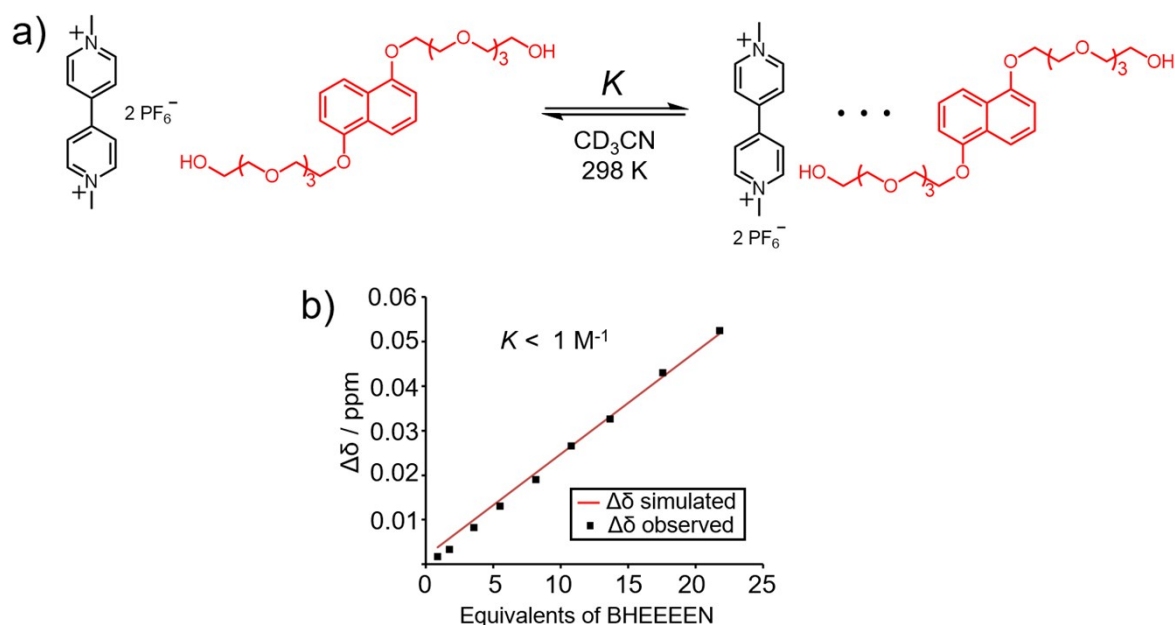

**Figure S35.** a) The binding behavior between **MV•2PF<sub>6</sub>** and **BH4EN**. b) Observed (dot) and calculated (red trace) binding curves of the upfield shifts of the resonance of proton  $\text{H}_b$  in **MV•2PF<sub>6</sub>** versus  $[\text{BH4EN}]/[\text{MV•2PF}_6]$ . By using a 1:1 binding model, the binding constants could be determined. This binding constant is lower than that of **BH4EN**⊂**AzaEx<sup>2</sup>Cage**•6PF<sub>6</sub>, indicating that cage cavity could help to stabilize the supramolecular complexation.

## 5. Cyclic Voltammetry (CV) Analysis and UV-Vis-NIR Absorption spectrum of **AzaEx<sup>2</sup>Cage**·6PF<sub>6</sub>.

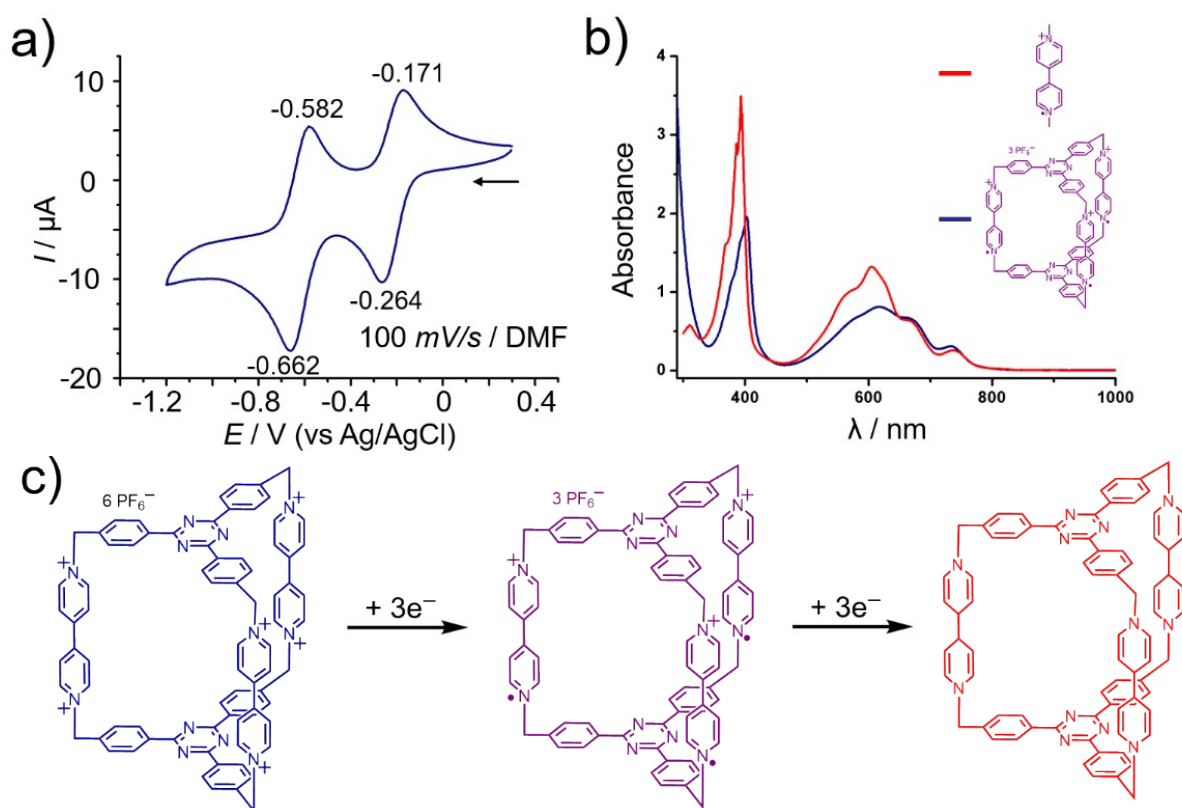

**Figure S36.** a) Cyclic voltammetry (CV) of **AzaEx<sup>2</sup>Cage**·6PF<sub>6</sub> (0.5 mM, DMF, 298 K) shows two three-electron redox processes, which correspond to the reduction of the **BIPY<sup>2+</sup>** pillars in the **AzaEx<sup>2</sup>Cage**·6PF<sub>6</sub>. A glassy carbon working electrode, a platinum counter electrode, and a Ag/AgCl reference electrode were used in the CV experiment, in which 0.1 M TBAPF<sub>6</sub> was used as the electrolyte. The scan rate is 100 mV s<sup>-1</sup>. b) UV-Vis-NIR absorption spectrum of **AzaEx<sup>2</sup>Cage**<sup>3(+)</sup> ( $1.5 \times 10^{-4}$  M<sup>-1</sup>) recorded in MeCN at 298 K. The solution containing **AzaEx<sup>2</sup>Cage**<sup>3(+)</sup> was produced by adding Zn dust into a solution of **AzaEx<sup>2</sup>Cage**·6PF<sub>6</sub> in MeCN. The UV-Vis-NIR absorption spectrum (blue trace) is essentially the same as that of methyl-viologen (red trace). c) The schematic representation of the two-step reduction process of **AzaEx<sup>2</sup>Cage**·6PF<sub>6</sub>.



## 6. X-ray Crystallography

### 1) **AzaEx<sup>2</sup>Cage**•6CF<sub>3</sub>CO<sub>2</sub>

#### 1.1) Methods

Single crystals of **AzaEx<sup>2</sup>Cage**•6CF<sub>3</sub>CO<sub>2</sub> were grown at room temperature by slow vapor diffusion of *i*Pr<sub>2</sub>O into a solution of **AzaEx<sup>2</sup>Cage**•6CF<sub>3</sub>CO<sub>2</sub> in MeCN (2.0 mM). A suitable crystal was selected and was mounted on a MITIGEN holder in Paratone oil on a Bruker Kappa APEX CCD area detector diffractometer. Data collection was performed at 100 K. The structure was solved using Olex2<sup>3</sup> with the ShelXT<sup>4</sup> structure solution program relying on Intrinsic Phasing. Crystal structure refinement was performed by using a ShelXL<sup>5</sup> refinement package relying on Least Squares minimization.

#### 1.2) Crystal data

C<sub>39</sub>H<sub>30</sub>N<sub>6</sub>•(C<sub>2</sub>F<sub>3</sub>O<sub>2</sub>)<sub>3</sub>,  $M = 921.75$ , monoclinic, space group *P21/m* (no. 11),  $a = 13.6264(5)$  Å,  $b = 30.4112(12)$  Å,  $c = 14.0126(5)$  Å,  $\beta = 100.631(2)^\circ$ ,  $V = 5707.1(4)$  Å<sup>3</sup>,  $Z = 4$ ,  $T = 100$  K,  $\mu(\text{CuK}\alpha) = 0.800$  mm<sup>-1</sup>,  $D_{\text{calc}} = 1.073$  g/mm<sup>3</sup>, 30865 reflections measured ( $5.812 \leq 2\theta \leq 127.63$ ), 9551 unique ( $R_{\text{int}} = 0.0274$ ,  $R_{\text{sigma}} = 0.0266$ ) which were used in all calculations. The final  $R_1$  was 0.1063 ( $I > 2\sigma(I)$ ) and  $wR_2$  was 0.3680 (all data). CCDC number: 1858887

Distance restraints were imposed on the disordered anions as well as restraints on similar amplitudes separated by less than 1.7 Å. The solvent masking procedure as implemented in Olex2 was used to remove the electronic contribution of solvent molecules from the refinement. As the exact solvent content is not known, only the atoms used in the refinement model are reported in the formula here. Total solvent accessible volume / cell = 1871.5 Å<sup>3</sup> [32.7%] Total electron count / cell = 388.9.

1.3) Solid-state (super) structures

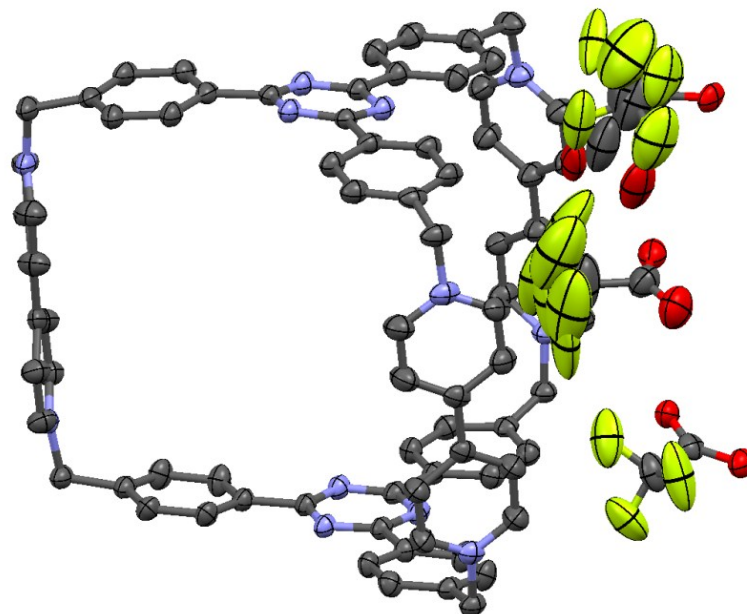

**Figure S37.** Thermal ellipsoids (50% probability) plot of **AzaEx<sup>2</sup>Cage•6CF<sub>3</sub>CO<sub>2</sub>**.

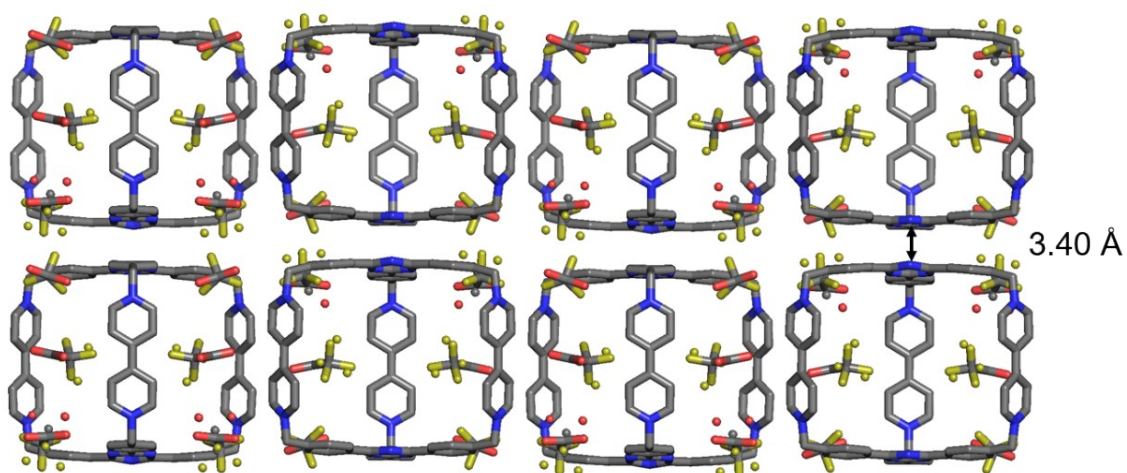

**Figure S38.** Side-on view along *a* axis of the long range packing of **AzaEx<sup>2</sup>Cage•6CF<sub>3</sub>CO<sub>2</sub>**.

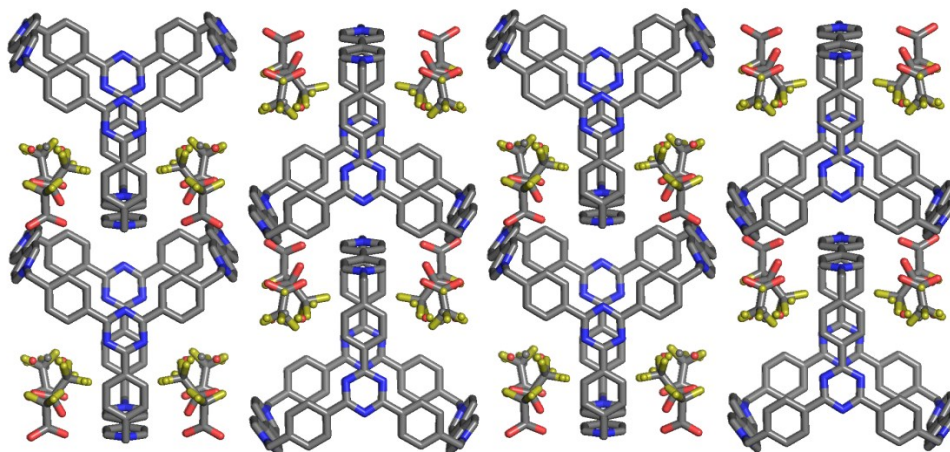

**Figure S39.** Side-on view along **c** axis of the long range packing of **AzaEx<sup>2</sup>Cage•6CF<sub>3</sub>CO<sub>2</sub>**.

## 2) AzaEx<sup>2</sup>Cage•6PF<sub>6</sub>

### 2.1) Methods

Single crystals of **AzaEx<sup>2</sup>Cage•6PF<sub>6</sub>** were grown at 4 °C by slow vapor diffusion of *i*Pr<sub>2</sub>O into a solution of **AzaEx<sup>2</sup>Cage•6PF<sub>6</sub>** in MeCN (2.0 mM). A suitable crystal was selected and was mounted on a MITIGEN holder in Paratone oil on a Kappa APEX 2 diffractometer. The crystal was kept at 100 K during data collection. The structure was solved using Olex2<sup>3</sup> with the ShelXT<sup>4</sup> structure solution program relying on Intrinsic Phasing. Crystal structure refinement was performed by using a ShelXL<sup>5</sup> refinement package relying on Least Squares minimization.

### 2.2) Crystal data

$C_{78}H_{60}N_{12} \cdot (PF_6)_6 \cdot (C_2H_3N)_4$ ,  $M = 2199.41$ , triclinic, space group  $P$  (no.2),  $a = 13.9020(14)$  Å,  $b = 19.595(2)$  Å,  $c = 25.262(2)$  Å,  $\alpha = 83.509(8)^\circ$ ,  $\beta = 84.344(8)^\circ$ ,  $\gamma = 85.297(8)^\circ$ ,  $V = 6786.9(12)$  Å<sup>3</sup>,  $Z = 2$ ,  $T = 100$  K,  $\mu(CuK\alpha) = 1.525$  mm<sup>-1</sup>,  $D_{calc} = 1.076$  g/mm<sup>3</sup>, 13490 reflections measured ( $3.534 \leq 2\theta \leq 101.668$ ), 13490 unique ( $R_{int} = ?$ ,  $R_{sigma} = 0.1522$ ) which were used in all calculations. The final  $R_1$  was 0.2253 ( $I > 2\sigma(I)$ ) and  $wR_2$  was 0.5309 (all data). CCDC number: 1858888

The enhanced rigid-bond restraint (SHELX keyword RIGU) was applied globally, as well as restraints on similar amplitudes separated by less than 1.7 Å. An ISOR restraint was

imposed on N6 so that it would make it more isotropic. The crystal under investigation was found to be non-merohedrally twinned. The orientation matrices for the two components were identified using the program Cell\_Now, and the data were processed using both orientation matrices with SAINT, the exact twin matrix identified by the integration program was found to be  $(-1.00035 \ 0.00350 \ -0.00026 / -0.19461 \ 1.00018 \ -0.16596 / 0.00008 \ -0.00192 \ -0.99983)$ . The second domain is rotated from first domain by  $180^\circ$  about the real lattice b axis. The absorption correction was carried out using TWINABS V2008/4 to create an hklf5 file which was used in all refinements; the structure was solved using direct methods with only the non-overlapping reflections of component 1. The twin fraction refined to a value of 0.310(4). Diffuse, disordered solvent molecules could not be adequately modeled. The bypass procedure in Platon was used to remove the electronic contribution from these solvents. The total potential solvent accessible void volume was  $2524 \text{ \AA}^3$  and the electron count / cell = 807. As the exact solvent content is not known, the reported formula reflects only the atoms used in the refinement.

### 2.3) Solid-state (super) structures

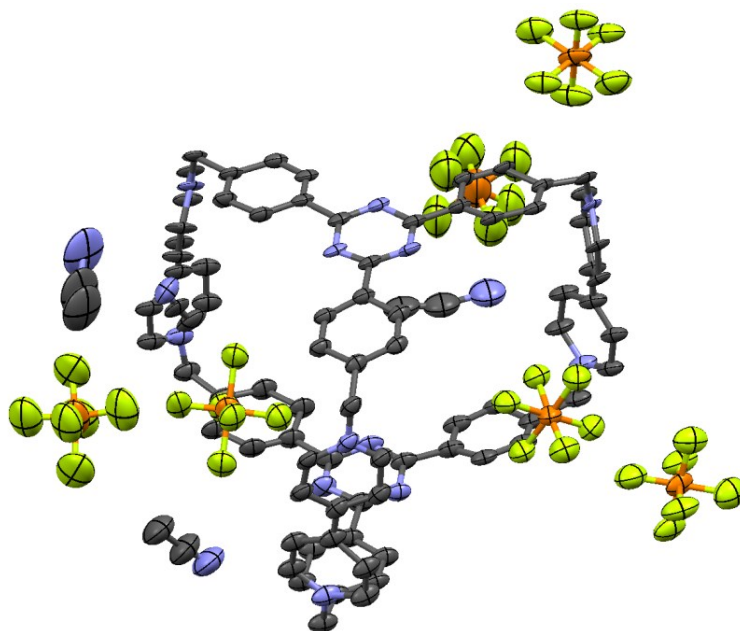

**Figure S40.** Thermal ellipsoids (50% probability) plot of **AzaEx<sup>2</sup>Cage•6PF<sub>6</sub>**.

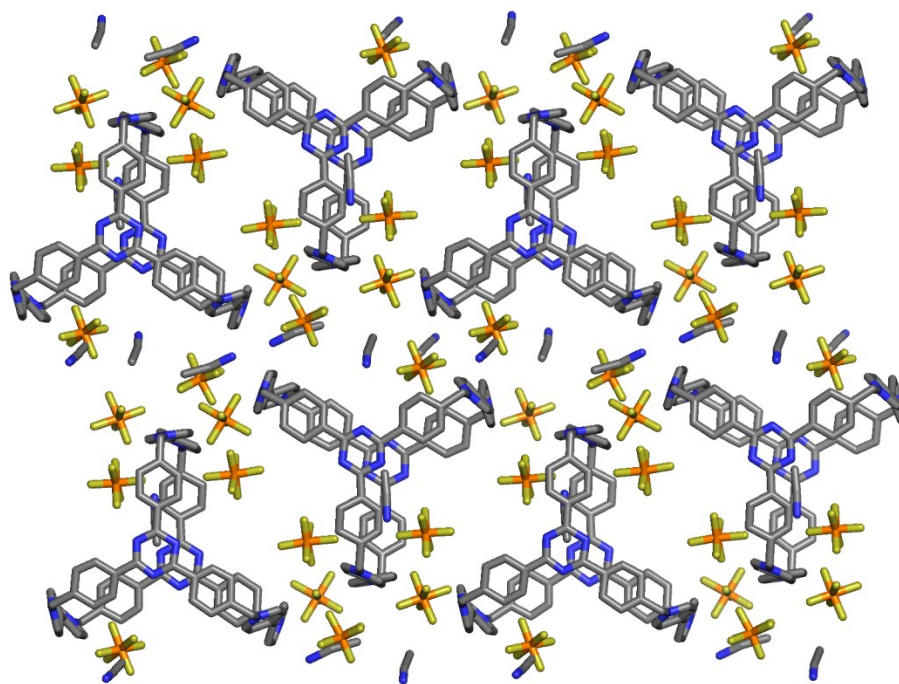

**Figure S41.** Side-on view along **c** axis of the long range packing of **AzaEx<sup>2</sup>Cage·6PF<sub>6</sub>**.

### 3) (PCA)<sub>2</sub> ⊂ AzaEx<sup>2</sup>Cage·6PF<sub>6</sub>

#### 3.1) Methods

Solid **PCA** (1.0 mg, 1.6 μmol) was added to a solution of **AzaEx<sup>2</sup>Cage·6PF<sub>6</sub>** in MeCN (2.0 mM, 0.75 mL). After dissolving, the mixture was passed through a 0.45 μm filter and split equally into three 1 mL tubes. The tubes were placed together in one 20 mL vial containing *i*Pr<sub>2</sub>O (~3 mL) and the vial was capped. Slow vapor diffusion of *i*Pr<sub>2</sub>O into the solution of 1-pyrenecarboxaldehyde and **AzaEx<sup>2</sup>Cage·6PF<sub>6</sub>** in MeCN at 4 °C over the period of 3 d yielded yellow single crystals of (PCA)<sub>2</sub> ⊂ AzaEx<sup>2</sup>Cage·6PF<sub>6</sub>. A suitable crystal was selected and was mounted on a MITIGEN holder in Paratone oil on a Bruker Kappa APEX CCD area detector diffractometer. The crystal was kept at 100 K during data collection. The structure was solved using Olex<sup>2</sup> with the XM<sup>6</sup> structure solution program using Dual Space and refined with the XL<sup>6</sup> refinement package using Least Squares minimization.

### 3.2) Crystal data

$C_{78}H_{60}N_{12} \cdot (C_{17}H_{10}O)_2 \cdot (PF_6)_{5.5} \cdot (C_2H_3N)_1 \cdot (Br)_{0.5}$ ,  $M = 2504.22$ , orthorhombic, space group  $Pnma$  (no. 62),  $a = 27.3248(15) \text{ \AA}$ ,  $b = 42.161(3) \text{ \AA}$ ,  $c = 24.1600(16) \text{ \AA}$ ,  $V = 27834(3) \text{ \AA}^3$ ,  $Z = 8$ ,  $T = 100 \text{ K}$ ,  $\mu(\text{CuK}\alpha) = 1.634 \text{ mm}^{-1}$ ,  $D_{\text{calc}} = 1.195 \text{ g/mm}^3$ , 34207 reflections measured ( $5.314 \leq 2\theta \leq 100.866$ ), 14398 unique ( $R_{\text{int}} = 0.1356$ ,  $R_{\text{sigma}} = 0.1648$ ) which were used in all calculations. The final  $R_1$  was 0.1608 ( $I > 2\sigma(I)$ ) and  $wR_2$  was 0.4438 (all data). CCDC number: 1858889

Distance restraints were imposed on the **PCA** guest molecule. Rigid bond restraints were imposed on the displacement parameters as well as restraints on similar amplitudes separated by less than 1.7  $\text{\AA}$ . on the guest molecules. The enhanced rigid-bond restraint (SHELX keyword RIGU) was applied on the cage. The guest molecules were restrained esd that their  $U_{ij}$  components approximate to isotropic. The solvent masking procedure as implemented in Olex2 was used to remove the electronic contribution of solvent molecules from the refinement. As the exact solvent content is not known, only the atoms used in the refinement model are reported in the formula here. Total solvent accessible volume / cell = 7066.1  $\text{\AA}^3$  [25.4%] Total electron count / cell = 1815.8.

### 3.3) Solid-state (super) structures

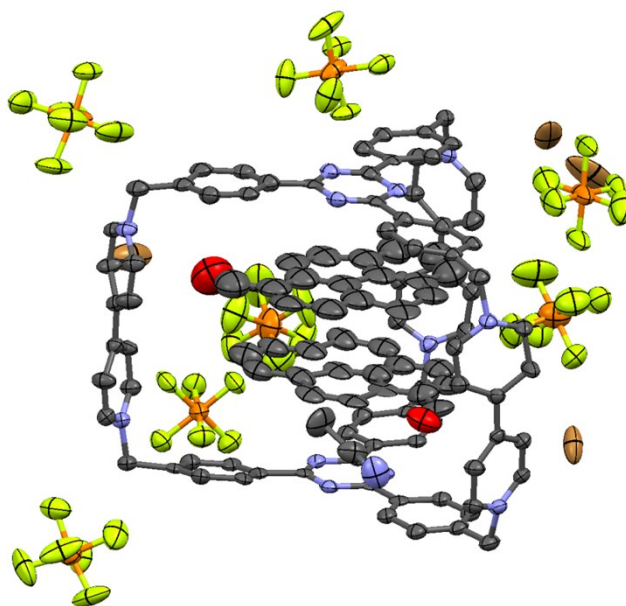

**Figure S42.** Thermal ellipsoids (30% probability) plot of  $(\text{PCA})_2\text{C-AzaEx}^2\text{Cage} \cdot 6\text{PF}_6$ .

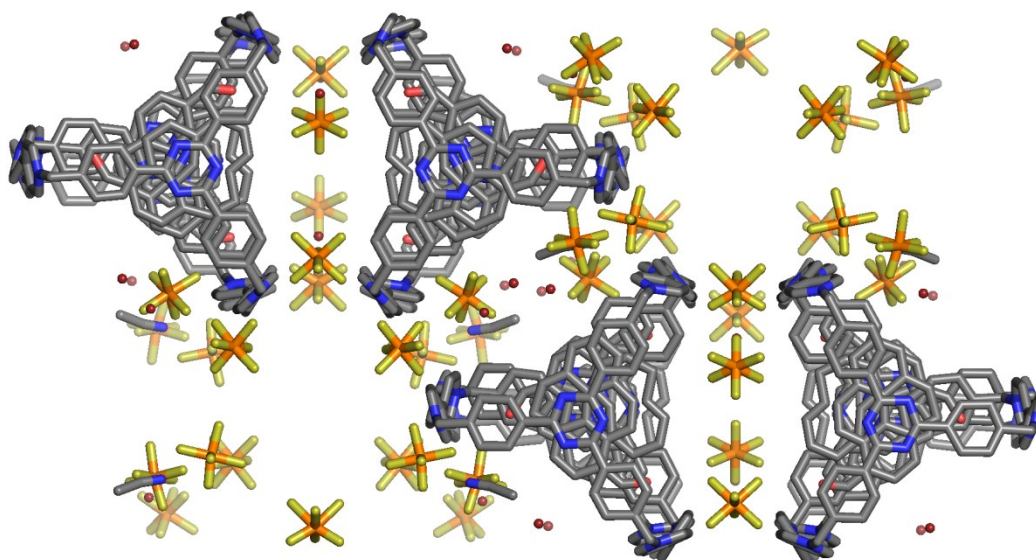

**Figure S43.** Side-on view along **a** axis of the long range packing of  $(\text{PCA})_2 \subset \text{AzaEx}^2\text{Cage} \cdot 6\text{PF}_6$ .

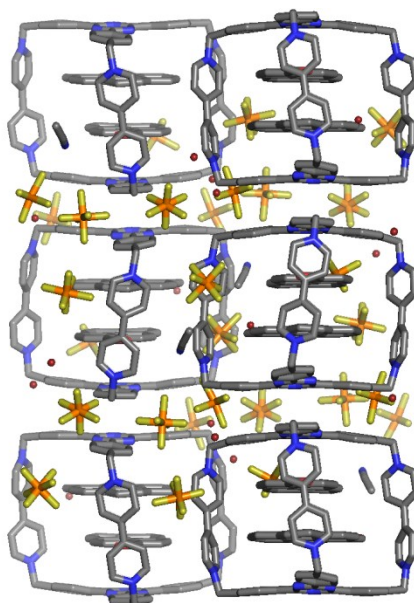

**Figure S44.** Side-on view along **b** axis of the long range packing of  $(\text{PCA})_2 \subset \text{AzaEx}^2\text{Cage} \cdot 6\text{PF}_6$ .

#### 4) $\text{BH4EN} \cdot \text{AzaEx}^2\text{Cage} \cdot 6\text{PF}_6$

##### 4.1) Methods

Single crystals of  $\text{BH4EN} \cdot \text{AzaEx}^2\text{Cage} \cdot 6\text{PF}_6$  were grown at room temperature by slow vapor diffusion of  $i\text{Pr}_2\text{O}$  into a 4:1 solution of  $\text{BH4EN}$  and  $\text{AzaEx}^2\text{Cage} \cdot 6\text{PF}_6$  in MeCN (2.0 mM). A suitable crystal was selected and the crystal was mounted on a MITIGEN holder in

Paratone oil on a Bruker APEX-II CCD diffractometer. The crystal was kept at 170 K during data collection. The structure was solved using Olex2<sup>3</sup> with the ShelXT<sup>4</sup> structure solution program using Intrinsic Phasing and refined with the ShelXL<sup>5</sup> refinement package using Least Squares minimization.

#### 4.2) Crystal data

$C_{78}H_{60}N_{12} \cdot (C_{26}H_{40}O_{10})_{0.5} \cdot (PF_6)_6 \cdot (C_2H_5N)_4$ ,  $M = 2455.70$ , triclinic, space group  $P$  (*no. 2*),  $a = 13.6331(5) \text{ \AA}$ ,  $b = 20.6544(8) \text{ \AA}$ ,  $c = 24.9241(10) \text{ \AA}$ ,  $\alpha = 72.715(3)^\circ$ ,  $\beta = 85.475(3)^\circ$ ,  $\gamma = 81.308(2)^\circ$ ,  $V = 6620.0(5) \text{ \AA}^3$ ,  $Z = 2$ ,  $T = 170 \text{ K}$ ,  $\mu(\text{GaK}\alpha) = 1.060 \text{ mm}^{-1}$ ,  $D_{\text{calc}} = 1.232 \text{ g/mm}^3$ , 81234 reflections measured ( $6.46 \leq 2\theta \leq 109.932$ ), 25036 unique ( $R_{\text{int}} = 0.0681$ ,  $R_{\text{sigma}} = 0.0728$ ) which were used in all calculations. The final  $R_1$  was 0.1278 ( $I > 2\sigma(I)$ ) and  $wR_2$  was 0.4100 (all data). CCDC number: 1858890

Distance restraints were imposed on the guest molecule. The enhanced rigid-bond restraint (SHELX keyword RIGU) was applied on O4, O5, C85 and C84. The contributions to the scattering factors due to disordered solvent molecules were removed by use of the utility SQUEEZE in PLATON.

#### 4.3) Solid-state (super) structures

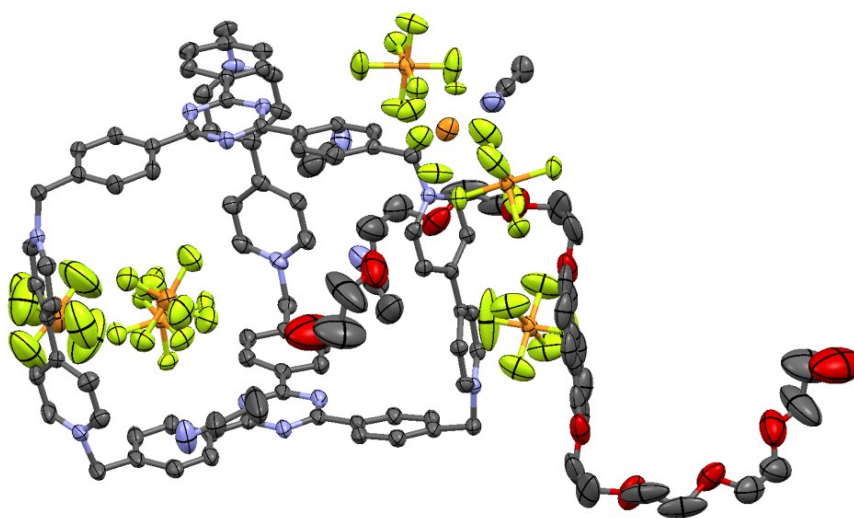

**Figure S45.** Thermal ellipsoids (30% probability) plot of **BH4EN·AzaEx<sup>2</sup>Cage·6PF<sub>6</sub>**.



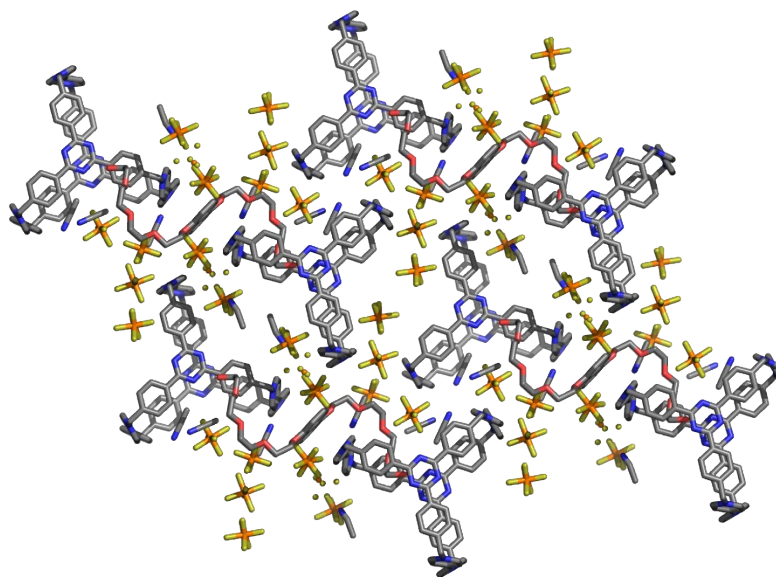

**Figure S46.** Side-on view along **a** axis of the long range packing of **BH4EN·AzaEx<sup>2</sup>Cage·6PF<sub>6</sub>**.

## 5) **BH4EN·(PCA)<sub>2</sub>⊂AzaEx<sup>2</sup>Cage·6PF<sub>6</sub>**

### 5.1) Methods

Single crystals of **BH4EN·(PCA)<sub>2</sub>⊂AzaEx<sup>2</sup>Cage·6PF<sub>6</sub>** were grown at room temperature by slow vapor diffusion of *i*Pr<sub>2</sub>O into a 10:4:1 solution of **PCA**, **BH4EN** and **AzaEx<sup>2</sup>Cage·6PF<sub>6</sub>** in MeCN (2.0 mM). A suitable crystal was selected and the crystal was mounted on a MITIGEN holder in Paratone oil on a Bruker APEX-II CCD diffractometer. The crystal was kept at 170 K during data collection. The structure was solved using Olex2<sup>3</sup> with the ShelXT<sup>4</sup> structure solution program using Intrinsic Phasing and refined with the ShelXL<sup>5</sup> refinement package using Least Squares minimization.

### 5.2) Crystal data

$C_{78}H_{60}N_{12} \cdot (C_{17}H_{10}O)_3 \cdot (C_{26}H_{40}O_{10})_{0.5} \cdot (PF_6)_6 \cdot (C_2H_3N)_1 \cdot (H_2O)_1$ ,  $M = 3041.30$ , triclinic, space group *P* (*no.* 2),  $a = 13.9039(5)$  Å,  $b = 22.9522(9)$  Å,  $c = 23.8176(9)$  Å,  $\alpha = 82.666(2)^\circ$ ,  $\beta = 84.915(2)^\circ$ ,  $\gamma = 85.037(2)^\circ$ ,  $V = 7487.2(5)$  Å<sup>3</sup>,  $Z = 2$ ,  $T = 170$  K,  $\mu(\text{GaK}\alpha) = 1.019$  mm<sup>-1</sup>,  $D_{\text{calc}} = 1.349$  g/mm<sup>3</sup>, 81897 reflections measured ( $5.568 \leq 2\theta \leq 93.606$ ), 20061 unique ( $R_{\text{int}} = 0.0646$ ,  $R_{\text{sigma}} = 0.0653$ ) which were used in all calculations. The final  $R_I$  was 0.1575 ( $I >$

$2\sigma(I)$  and  $wR_2$  was 0.4621 (all data). CCDC number: 1858892

Distance restraints were imposed on the **PCA** guest molecule. The enhanced rigid-bond restraint (SHELX keyword RIGU) was applied on the **PCA** and **BH4EN**. The guest molecules were restrained so that their  $U_{ij}$  components approximate to isotropic. The solvent masking procedure as implemented in Olex2 was used to remove the electronic contribution of solvent molecules from the refinement.

### 5.3) Solid-state (super) structures

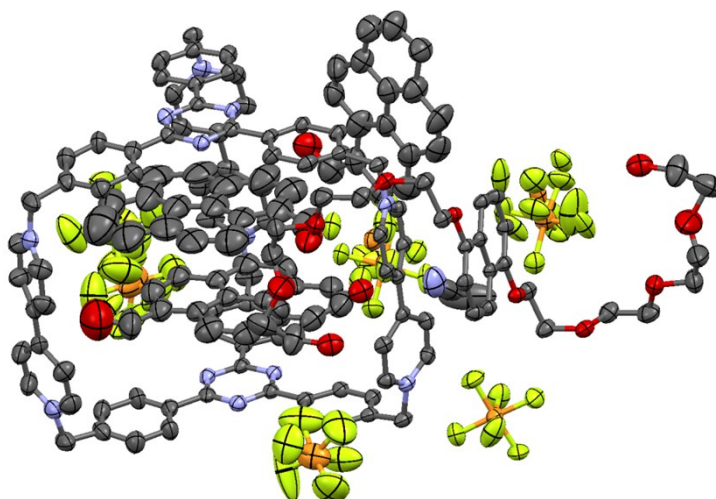

**Figure S47.** Thermal ellipsoids (30% probability) plot of **BH4EN · (PCA)<sub>2</sub> c AzaEx<sup>2</sup>Cage · 6PF<sub>6</sub>**.

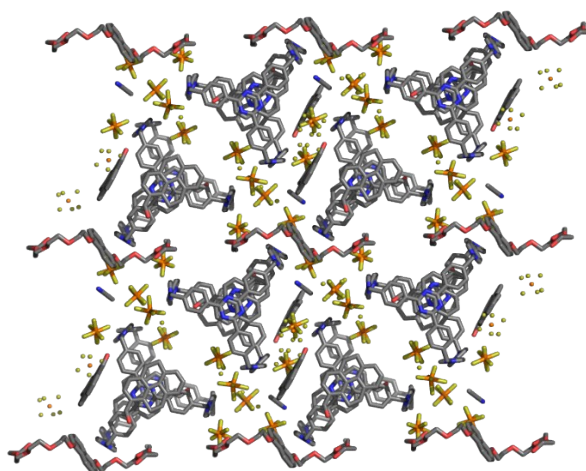

**Figure S48.** Side-on view along **a** axis of the long range packing of **BH4EN · (PCA)<sub>2</sub> c AzaEx<sup>2</sup>Cage · 6PF<sub>6</sub>**.

## 6. Computational Analysis

### 6.1) Methods

All density functional theory (DFT) calculations were performed with Gaussian 09.<sup>7</sup> Geometry optimization of all the structures was carried out at the M06-2X level of theory<sup>8,9</sup> with 6-31G(d) basis set.<sup>10</sup> The vibrational frequencies of the optimized stationary points are calculated under the same level of theory, to obtain the zero-point vibrational energy (ZPVE) and thermal corrections at 298 K as well as verifying whether each of optimized stationary points is an energy minimum. The single-point energies and solvent effects in acetonitrile were computed at M06-2X level of theory with 6-311++G(d,p) basis set<sup>10</sup> for all the atoms, based on the gas-phase optimized structures. Solvation energies were evaluated by a self-consistent reaction field (SCRF) using the SMD model.<sup>11</sup> The reduced density gradient (RDG)<sup>12</sup> figure of  $(\text{PCA})_2\subset\text{AzaEx}^2\text{Cage}^{6+}$  was calculated by using the Multiwfn software<sup>13</sup> based on the DFT-optimized structure, and visualized by the Visual Molecular Dynamics (VMD) software.<sup>14</sup> The 3D diagrams of molecules were generated by using CYLView.<sup>15</sup>

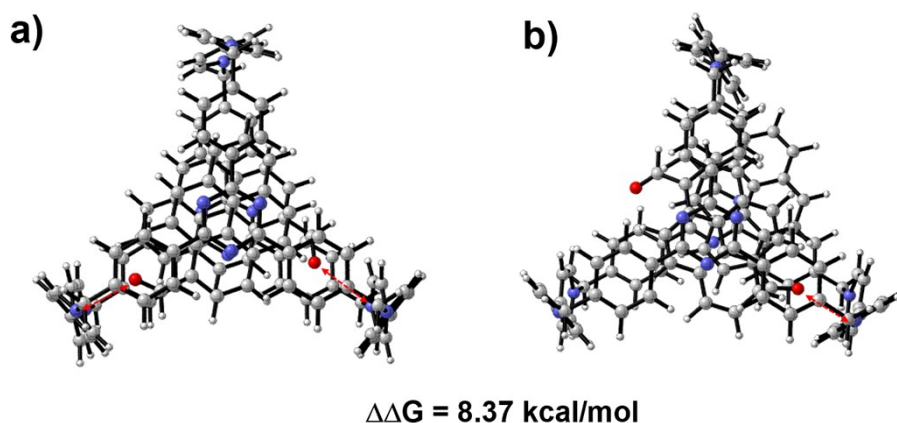

**Figure S49.** The DFT-optimized structure of a)  $(\text{PCA})_2\subset\text{AzaEx}^2\text{Cage}^{6+}$  with a conformation which is based on the single-crystal X-ray diffraction results, and b) a conformation in which the **PCA** guest undergoes a rotation by  $60^\circ$ , after which the carbonyl function of the guest is located in the middle between the two viologen pillars. DFT calculations indicate that the former conformation is more stable than the latter one by 8.37 kcal/mol, indicating the importance of the cation-dipole interactions.

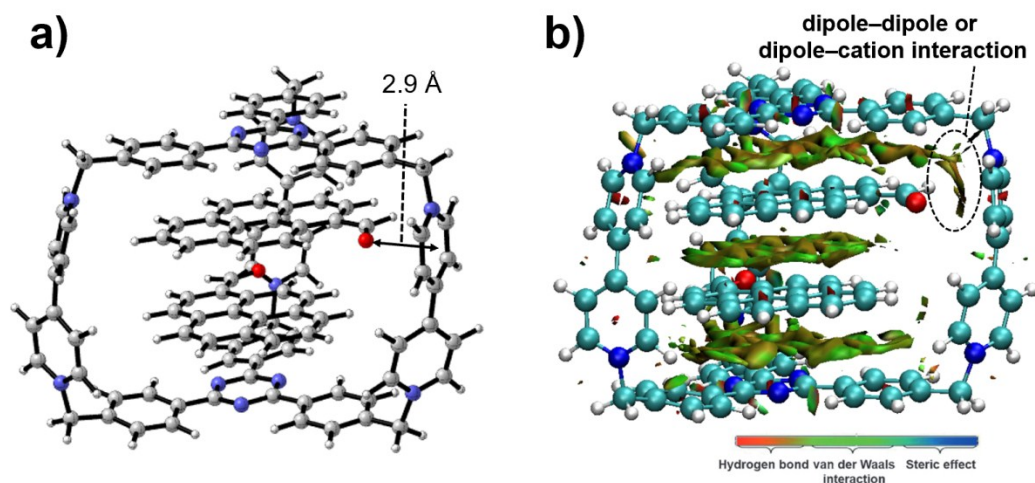

**Figure S50.** a) The DFT-optimized structure of  $(\text{PCA})_2\text{C-AzaEx}^2\text{Cage}^{6+}$ . b) Reduced density gradient (RDG) figure of  $(\text{PCA})_2\text{C-AzaEx}^2\text{Cage}^{6+}$ .

### 6.2) Detailed Computed Energies (in Hartrees) of Optimized Structures

| Structure                                  | pyrene      | PCA         | AzaEx <sup>2</sup> Cage <sup>6+</sup> | (pyrene) <sub>2</sub> C<br>AzaEx <sup>2</sup> Cage <sup>6+</sup> | (PCA) <sub>2</sub> C-AzaEx <sup>2</sup> Cage <sup>6+</sup> | BH4EN•<br>AzaEx <sup>2</sup> Cage <sup>6+</sup> |
|--------------------------------------------|-------------|-------------|---------------------------------------|------------------------------------------------------------------|------------------------------------------------------------|-------------------------------------------------|
| ZPE                                        | 0.209262    | 0.219288    | 1.234570                              | 1.655143                                                         | 1.676172                                                   | 1.901352                                        |
| ΔE                                         | 0.219249    | 0.231263    | 1.302109                              | 1.745138                                                         | 1.769648                                                   | 2.006777                                        |
| ΔH                                         | 0.220193    | 0.232207    | 1.303053                              | 1.746082                                                         | 1.770592                                                   | 2.007721                                        |
| ΔG                                         | 0.174001    | 0.181361    | 1.126309                              | 1.528369                                                         | 1.547935                                                   | 1.749909                                        |
| E <sub>MeCN</sub>                          | -615.459841 | -728.766161 | -3662.822653                          | -4893.798166                                                     | -5120.420894                                               | -5428.957058                                    |
| H <sub>MeCN</sub>                          | -615.458897 | -728.765217 | -3662.821709                          | -4893.797222                                                     | -5120.419950                                               | -5428.956114                                    |
| G <sub>MeCN</sub>                          | -615.505089 | -728.816063 | -3662.998453                          | -4894.014935                                                     | -5120.642607                                               | -5429.213926                                    |
| Imaginary<br>Frequency (cm <sup>-1</sup> ) | -           | -           | -                                     | -                                                                | -                                                          | -                                               |

**Table S1.** Energies, enthalpies, and free energies (in Hartrees) of optimized structures calculated at the M06-2X/6-311++G(d,p), SMD(MeCN)//M06-2X/6-31G(d) level of theory.

### 6.3) Summary of Natural Population Analysis

#### AzaEx<sup>2</sup>Cage<sup>6+</sup>

| Natural Population |          |         |         |         |         |  |
|--------------------|----------|---------|---------|---------|---------|--|
| Atom No            | Charge   | Core    | Valence | Rydberg | Total   |  |
| C 1                | 0.49034  | 1.99920 | 3.47777 | 0.03270 | 5.50966 |  |
| C 2                | -0.10338 | 1.99883 | 4.08546 | 0.01910 | 6.10338 |  |
| N 3                | -0.54681 | 1.99934 | 5.52626 | 0.02121 | 7.54681 |  |
| C 4                | -0.15879 | 1.99897 | 4.14395 | 0.01587 | 6.15879 |  |
| C 5                | -0.15903 | 1.99897 | 4.14439 | 0.01566 | 6.15903 |  |

|      |          |         |         |         |         |      |          |         |         |         |         |
|------|----------|---------|---------|---------|---------|------|----------|---------|---------|---------|---------|
| N 6  | -0.54692 | 1.99934 | 5.52638 | 0.02120 | 7.54692 | H 50 | 0.25516  | 0.00000 | 0.74332 | 0.00152 | 0.74484 |
| C 7  | 0.48999  | 1.99920 | 3.47815 | 0.03266 | 5.51001 | H 51 | 0.25466  | 0.00000 | 0.74387 | 0.00147 | 0.74534 |
| C 8  | -0.20586 | 1.99912 | 4.18906 | 0.01768 | 6.20586 | C 52 | 0.01605  | 1.99907 | 3.96668 | 0.01819 | 5.98395 |
| H 9  | 0.24463  | 0.00000 | 0.75364 | 0.00173 | 0.75537 | H 53 | 0.26972  | 0.00000 | 0.72873 | 0.00155 | 0.73028 |
| C 10 | -0.20320 | 1.99912 | 4.18649 | 0.01759 | 6.20320 | H 54 | 0.27193  | 0.00000 | 0.72654 | 0.00153 | 0.72807 |
| H 11 | 0.24391  | 0.00000 | 0.75435 | 0.00175 | 0.75609 | N 55 | -0.31540 | 1.99929 | 5.29913 | 0.01697 | 7.31540 |
| C 12 | 0.49035  | 1.99920 | 3.47779 | 0.03266 | 5.50965 | H 56 | 0.25526  | 0.00000 | 0.74322 | 0.00152 | 0.74474 |
| C 13 | -0.10495 | 1.99883 | 4.08707 | 0.01906 | 6.10495 | H 57 | 0.25461  | 0.00000 | 0.74393 | 0.00146 | 0.74539 |
| N 14 | -0.54658 | 1.99934 | 5.52599 | 0.02125 | 7.54658 | C 58 | 0.12418  | 1.99920 | 3.85615 | 0.02047 | 5.87582 |
| C 15 | -0.05854 | 1.99905 | 4.04379 | 0.01570 | 6.05854 | C 59 | 0.12938  | 1.99921 | 3.85089 | 0.02052 | 5.87062 |
| H 16 | 0.23998  | 0.00000 | 0.75847 | 0.00155 | 0.76002 | C 60 | 0.01699  | 1.99907 | 3.96573 | 0.01821 | 5.98301 |
| H 17 | 0.23851  | 0.00000 | 0.75989 | 0.00160 | 0.76149 | C 61 | 0.12375  | 1.99920 | 3.85662 | 0.02043 | 5.87625 |
| C 18 | -0.10454 | 1.99883 | 4.08664 | 0.01908 | 6.10454 | C 62 | 0.13029  | 1.99921 | 3.85002 | 0.02049 | 5.86971 |
| C 19 | -0.15849 | 1.99897 | 4.14367 | 0.01585 | 6.15849 | C 63 | -0.18506 | 1.99897 | 4.17142 | 0.01467 | 6.18506 |
| C 20 | -0.15843 | 1.99897 | 4.14376 | 0.01570 | 6.15843 | H 64 | 0.26358  | 0.00000 | 0.73493 | 0.00149 | 0.73642 |
| C 21 | -0.18276 | 1.99917 | 4.16327 | 0.02032 | 6.18276 | C 65 | -0.18939 | 1.99897 | 4.17552 | 0.01490 | 6.18939 |
| C 22 | -0.15841 | 1.99897 | 4.14357 | 0.01587 | 6.15841 | H 66 | 0.26436  | 0.00000 | 0.73436 | 0.00127 | 0.73564 |
| C 23 | -0.15858 | 1.99897 | 4.14392 | 0.01569 | 6.15858 | C 67 | -0.18915 | 1.99897 | 4.17528 | 0.01490 | 6.18915 |
| C 24 | -0.20545 | 1.99912 | 4.18863 | 0.01769 | 6.20545 | C 68 | -0.18488 | 1.99897 | 4.17125 | 0.01467 | 6.18488 |
| H 25 | 0.24449  | 0.00000 | 0.75375 | 0.00175 | 0.75551 | C 69 | -0.18496 | 1.99897 | 4.17134 | 0.01466 | 6.18496 |
| C 26 | -0.20512 | 1.99912 | 4.18845 | 0.01755 | 6.20512 | H 70 | 0.26328  | 0.00000 | 0.73520 | 0.00152 | 0.73672 |
| H 27 | 0.24426  | 0.00000 | 0.75399 | 0.00174 | 0.75574 | C 71 | -0.18902 | 1.99897 | 4.17514 | 0.01490 | 6.18902 |
| N 28 | -0.31498 | 1.99929 | 5.29878 | 0.01690 | 7.31498 | H 72 | 0.26432  | 0.00000 | 0.73441 | 0.00126 | 0.73568 |
| H 29 | 0.25524  | 0.00000 | 0.74323 | 0.00153 | 0.74476 | C 73 | 0.01690  | 1.99907 | 3.96581 | 0.01822 | 5.98310 |
| H 30 | 0.25451  | 0.00000 | 0.74403 | 0.00145 | 0.74549 | H 74 | 0.27013  | 0.00000 | 0.72833 | 0.00154 | 0.72987 |
| C 31 | -0.20547 | 1.99912 | 4.18860 | 0.01775 | 6.20547 | H 75 | 0.27178  | 0.00000 | 0.72668 | 0.00153 | 0.72822 |
| H 32 | 0.24439  | 0.00000 | 0.75386 | 0.00175 | 0.75561 | C 76 | 0.12928  | 1.99921 | 3.85098 | 0.02054 | 5.87072 |
| C 33 | -0.20528 | 1.99912 | 4.18865 | 0.01751 | 6.20528 | H 77 | 0.27163  | 0.00000 | 0.72684 | 0.00153 | 0.72837 |
| H 34 | 0.24415  | 0.00000 | 0.75411 | 0.00174 | 0.75585 | C 78 | 0.12408  | 1.99920 | 3.85623 | 0.02048 | 5.87592 |
| C 35 | -0.05530 | 1.99905 | 4.04081 | 0.01544 | 6.05530 | H 79 | 0.26999  | 0.00000 | 0.72847 | 0.00154 | 0.73001 |
| H 36 | 0.23954  | 0.00000 | 0.75889 | 0.00157 | 0.76046 | C 80 | 0.01687  | 1.99907 | 3.96580 | 0.01826 | 5.98313 |
| H 37 | 0.23878  | 0.00000 | 0.75962 | 0.00160 | 0.76122 | H 81 | 0.26982  | 0.00000 | 0.72865 | 0.00153 | 0.73018 |
| C 38 | 0.12280  | 1.99920 | 3.85763 | 0.02037 | 5.87720 | H 82 | 0.27192  | 0.00000 | 0.72656 | 0.00153 | 0.72808 |
| C 39 | 0.13198  | 1.99921 | 3.84841 | 0.02040 | 5.86802 | C 83 | 0.01593  | 1.99907 | 3.96680 | 0.01820 | 5.98407 |
| C 40 | -0.05598 | 1.99905 | 4.04139 | 0.01554 | 6.05598 | N 84 | -0.31533 | 1.99929 | 5.29904 | 0.01699 | 7.31533 |
| H 41 | 0.23971  | 0.00000 | 0.75873 | 0.00156 | 0.76029 | H 85 | 0.26438  | 0.00000 | 0.73435 | 0.00127 | 0.73562 |
| H 42 | 0.23878  | 0.00000 | 0.75963 | 0.00160 | 0.76122 | H 86 | 0.26362  | 0.00000 | 0.73489 | 0.00149 | 0.73638 |
| C 43 | -0.18273 | 1.99917 | 4.16317 | 0.02039 | 6.18273 | C 87 | 0.02176  | 1.99905 | 3.96150 | 0.01769 | 5.97824 |
| C 44 | -0.18501 | 1.99897 | 4.17141 | 0.01463 | 6.18501 | C 88 | -0.18879 | 1.99897 | 4.17488 | 0.01494 | 6.18879 |
| H 45 | 0.26234  | 0.00000 | 0.73607 | 0.00160 | 0.73766 | C 89 | -0.18487 | 1.99897 | 4.17126 | 0.01464 | 6.18487 |
| C 46 | -0.18840 | 1.99897 | 4.17450 | 0.01492 | 6.18840 | C 90 | -0.18255 | 1.99917 | 4.16301 | 0.02036 | 6.18255 |
| H 47 | 0.26411  | 0.00000 | 0.73464 | 0.00125 | 0.73589 | C 91 | -0.19962 | 1.99912 | 4.18599 | 0.01451 | 6.19962 |
| C 48 | -0.18248 | 1.99917 | 4.16295 | 0.02036 | 6.18248 | C 92 | -0.18480 | 1.99897 | 4.17103 | 0.01481 | 6.18480 |
| N 49 | -0.31519 | 1.99929 | 5.29892 | 0.01698 | 7.31519 | C 93 | 0.13214  | 1.99921 | 3.84826 | 0.02040 | 5.86786 |

H 94 0.27213 0.00000 0.72634 0.00152 0.72787  
 C 95 0.12268 1.99920 3.85774 0.02039 5.87732  
 H 96 0.26960 0.00000 0.72884 0.00155 0.73040  
 C 97 -0.05541 1.99905 4.04090 0.01546 6.05541  
 H 98 0.25514 0.00000 0.74333 0.00153 0.74486  
 H 99 0.25477 0.00000 0.74376 0.00147 0.74523  
 C 100 0.13475 1.99920 3.84594 0.02012 5.86525  
 H 101 0.27245 0.00000 0.72612 0.00143 0.72755  
 C 102 0.12342 1.99920 3.85704 0.02034 5.87658  
 H 103 0.26976 0.00000 0.72873 0.00151 0.73024  
 N 104 -0.31515 1.99929 5.29899 0.01686 7.31515  
 H 105 0.26420 0.00000 0.73455 0.00125 0.73580  
 H 106 0.26259 0.00000 0.73580 0.00161 0.73741  
 C 107 -0.20545 1.99912 4.18881 0.01751 6.20545  
 C 108 -0.20539 1.99912 4.18853 0.01773 6.20539  
 N 109 -0.31439 1.99929 5.29874 0.01637 7.31439  
 H 110 0.26419 0.00000 0.73454 0.00126 0.73581  
 H 111 0.26292 0.00000 0.73553 0.00155 0.73708  
 C 112 -0.18230 1.99917 4.16283 0.02030 6.18230  
 C 113 -0.15843 1.99897 4.14376 0.01570 6.15843  
 H 114 0.23884 0.00000 0.75957 0.00160 0.76116  
 C 115 -0.15848 1.99897 4.14365 0.01586 6.15848  
 H 116 0.23957 0.00000 0.75886 0.00156 0.76043  
 C 117 -0.18263 1.99917 4.16302 0.02044 6.18263  
 C 118 -0.05858 1.99905 4.04375 0.01577 6.05858  
 H 119 0.25487 0.00000 0.74359 0.00153 0.74513  
 H 120 0.25472 0.00000 0.74383 0.00145 0.74528  
 C 121 -0.10484 1.99883 4.08693 0.01908 6.10484  
 H 122 0.24434 0.00000 0.75392 0.00175 0.75566  
 H 123 0.24430 0.00000 0.75395 0.00175 0.75570  
 C 124 -0.05755 1.99905 4.04287 0.01563 6.05755  
 H 125 0.25493 0.00000 0.74354 0.00153 0.74507  
 H 126 0.25475 0.00000 0.74379 0.00146 0.74525  
 C 127 -0.20356 1.99912 4.18688 0.01756 6.20356  
 C 128 -0.20574 1.99912 4.18893 0.01770 6.20574

C 129 0.49025 1.99920 3.47790 0.03266 5.50975  
 C 130 -0.20417 1.99912 4.18748 0.01756 6.20417  
 C 131 -0.20532 1.99912 4.18849 0.01771 6.20532  
 C 132 -0.15891 1.99897 4.14427 0.01566 6.15891  
 H 133 0.23866 0.00000 0.75974 0.00160 0.76134  
 C 134 -0.15869 1.99897 4.14384 0.01588 6.15869  
 H 135 0.24011 0.00000 0.75834 0.00155 0.75989  
 N 136 -0.54679 1.99934 5.52623 0.02123 7.54679  
 N 137 -0.54640 1.99934 5.52583 0.02122 7.54640  
 C 138 -0.15861 1.99897 4.14395 0.01569 6.15861  
 H 139 0.23854 0.00000 0.75986 0.00160 0.76146  
 C 140 -0.15848 1.99897 4.14365 0.01586 6.15848  
 H 141 0.23982 0.00000 0.75862 0.00156 0.76018  
 C 142 -0.10362 1.99883 4.08572 0.01907 6.10362  
 H 143 0.24413 0.00000 0.75413 0.00175 0.75587  
 H 144 0.24451 0.00000 0.75375 0.00175 0.75549  
 C 145 0.49048 1.99920 3.47764 0.03269 5.50952  
 C 146 0.49008 1.99920 3.47806 0.03267 5.50992  
 C 147 -0.10414 1.99883 4.08621 0.01910 6.10414  
 H 148 0.24397 0.00000 0.75428 0.00174 0.75603  
 H 149 0.24453 0.00000 0.75374 0.00173 0.75547  
 N 150 -0.54695 1.99934 5.52639 0.02122 7.54695

=====

=====  
 \* Total \* 6.00010 179.91902 424.30161 1.77926  
 605.99990

Natural Population

-----  
 Core 179.91902 ( 99.9550% of 180)  
 Valence 424.30161 ( 99.6013% of 426)  
 Natural Minimal Basis 604.22064 ( 99.7064% of 606)  
 Natural Rydberg Basis 1.77926 ( 0.2936% of 606)  
 -----

**BH4EN • AzaEx<sup>2</sup>Cage<sup>6+</sup>**

Natural Population  
 Natural -----  
 -----  
 Atom No Charge Core Valence Rydberg Total  
 -----  
 O 1 -0.57860 1.99971 6.55149 0.02739 8.57860  
 O 2 -0.63638 1.99977 6.61262 0.02398 8.63638

C 3 -0.10185 1.99893 4.07701 0.02591 6.10185  
 O 4 -0.63503 1.99978 6.61019 0.02506 8.63503  
 C 5 -0.24612 1.99911 4.22129 0.02572 6.24612  
 H 6 0.25717 0.00000 0.73918 0.00365 0.74283  
 C 7 -0.24077 1.99925 4.20681 0.03470 6.24077  
 H 8 0.22516 0.00000 0.77232 0.00252 0.77484  
 C 9 0.32302 1.99882 3.63668 0.04148 5.67698

C 10 -0.22921 1.99907 4.21484 0.01530 6.22921  
H 11 0.23223 0.00000 0.76461 0.00316 0.76777  
C 12 -0.05430 1.99917 4.03364 0.02149 6.05430  
H 13 0.20134 0.00000 0.79699 0.00167 0.79866  
H 14 0.19113 0.00000 0.80416 0.00471 0.80887  
C 15 -0.03637 1.99921 4.01872 0.01844 6.03637  
H 16 0.19412 0.00000 0.80397 0.00191 0.80588  
H 17 0.18649 0.00000 0.81156 0.00194 0.81351  
O 18 -0.77390 1.99980 6.75969 0.01440 8.77390  
H 19 0.48862 0.00000 0.50699 0.00439 0.51138  
C 20 -0.05033 1.99923 4.03371 0.01739 6.05033  
H 21 0.18834 0.00000 0.80997 0.00169 0.81166  
H 22 0.17764 0.00000 0.82035 0.00201 0.82236  
C 23 -0.04722 1.99920 4.02799 0.02003 6.04722  
H 24 0.19088 0.00000 0.80747 0.00165 0.80912  
H 25 0.19496 0.00000 0.80275 0.00230 0.80504  
O 26 -0.64511 1.99978 6.61244 0.03289 8.64511  
C 27 -0.05548 1.99921 4.03708 0.01920 6.05548  
H 28 0.18341 0.00000 0.81442 0.00216 0.81659  
H 29 0.18429 0.00000 0.81401 0.00171 0.81571  
C 30 -0.05896 1.99922 4.03927 0.02047 6.05896  
C 31 -0.04450 1.99920 4.02337 0.02193 6.04450  
H 32 0.18947 0.00000 0.80852 0.00200 0.81053  
H 33 0.19439 0.00000 0.80344 0.00217 0.80561  
C 34 -0.04263 1.99921 4.02327 0.02016 6.04263  
O 35 -0.61965 1.99971 6.58450 0.03544 8.61965  
O 36 -0.64520 1.99979 6.62056 0.02486 8.64520  
C 37 -0.14208 1.99898 4.10791 0.03519 6.14208  
O 38 -0.63670 1.99977 6.60957 0.02735 8.63670  
C 39 -0.13675 1.99912 4.12032 0.01730 6.13675  
H 40 0.23032 0.00000 0.76641 0.00327 0.76968  
C 41 -0.24276 1.99927 4.21044 0.03305 6.24276  
H 42 0.22898 0.00000 0.76877 0.00225 0.77102  
C 43 0.36421 1.99870 3.60504 0.03204 5.63579  
C 44 -0.27567 1.99905 4.25616 0.02046 6.27567  
H 45 0.24550 0.00000 0.75284 0.00166 0.75450  
C 46 -0.06474 1.99913 4.04379 0.02182 6.06474  
H 47 0.19166 0.00000 0.80644 0.00190 0.80834  
H 48 0.21332 0.00000 0.78270 0.00398 0.78668  
C 49 -0.03549 1.99919 4.01672 0.01959 6.03549  
H 50 0.18904 0.00000 0.80964 0.00132 0.81096  
H 51 0.19307 0.00000 0.80526 0.00167 0.80693  
O 52 -0.75886 1.99981 6.74471 0.01434 8.75886  
H 53 0.47776 0.00000 0.51786 0.00438 0.52224

C 54 -0.04984 1.99919 4.03211 0.01854 6.04984  
H 55 0.19012 0.00000 0.80835 0.00153 0.80988  
H 56 0.18609 0.00000 0.81196 0.00195 0.81391  
C 57 -0.04534 1.99920 4.02675 0.01940 6.04534  
H 58 0.18859 0.00000 0.80969 0.00172 0.81141  
H 59 0.18737 0.00000 0.81079 0.00184 0.81263  
O 60 -0.64011 1.99976 6.61463 0.02572 8.64011  
C 61 -0.03776 1.99920 4.02030 0.01826 6.03776  
H 62 0.17990 0.00000 0.81798 0.00211 0.82010  
H 63 0.18585 0.00000 0.81253 0.00161 0.81415  
C 64 -0.04627 1.99926 4.02595 0.02105 6.04627  
C 65 -0.04126 1.99921 4.02243 0.01962 6.04126  
H 66 0.18234 0.00000 0.81592 0.00175 0.81766  
H 67 0.18256 0.00000 0.81462 0.00282 0.81744  
C 68 -0.05142 1.99924 4.03351 0.01867 6.05142  
N 69 -0.29597 1.99934 5.25893 0.03770 7.29597  
N 70 -0.54966 1.99934 5.52840 0.02191 7.54966  
N 71 -0.54830 1.99934 5.52706 0.02190 7.54830  
N 72 -0.31942 1.99929 5.30300 0.01713 7.31942  
N 73 -0.55014 1.99934 5.52869 0.02210 7.55014  
N 74 -0.55960 1.99934 5.52835 0.03191 7.55960  
N 75 -0.55995 1.99934 5.52853 0.03208 7.55995  
N 76 -0.54718 1.99934 5.52631 0.02153 7.54718  
N 77 -0.31394 1.99929 5.29809 0.01657 7.31394  
C 78 -0.14381 1.99912 4.11208 0.03261 6.14381  
H 79 0.27439 0.00000 0.72025 0.00536 0.72561  
N 80 -0.31522 1.99929 5.29846 0.01747 7.31522  
N 81 -0.31539 1.99929 5.29907 0.01702 7.31539  
C 82 -0.12678 1.99907 4.10907 0.01864 6.12678  
C 83 -0.20524 1.99910 4.18963 0.01651 6.20524  
H 84 0.27062 0.00000 0.72626 0.00311 0.72938  
C 85 0.18246 1.99926 3.77993 0.03834 5.81754  
H 86 0.26239 0.00000 0.72711 0.01049 0.73761  
C 87 0.03150 1.99902 3.94722 0.02226 5.96850  
C 88 -0.02586 1.99900 3.98557 0.04129 6.02586  
C 89 -0.21135 1.99910 4.19348 0.01876 6.21135  
H 90 0.26585 0.00000 0.73173 0.00242 0.73415  
C 91 -0.04856 1.99905 4.03432 0.01519 6.04856  
C 92 -0.20527 1.99912 4.18891 0.01724 6.20527  
H 93 0.23848 0.00000 0.75998 0.00154 0.76152  
C 94 -0.26494 1.99917 4.22611 0.03965 6.26494  
H 95 0.24695 0.00000 0.74819 0.00486 0.75305  
C 96 -0.06689 1.99904 4.03095 0.03689 6.06689  
C 97 -0.15678 1.99896 4.14178 0.01604 6.15678

H 98 0.24700 0.00000 0.75172 0.00128 0.75300  
C 99 -0.15492 1.99897 4.14040 0.01555 6.15492  
H 100 0.24419 0.00000 0.75409 0.00172 0.75581  
C 101 0.47164 1.99910 3.48269 0.04657 5.52836  
C 102 -0.20652 1.99912 4.19063 0.01677 6.20652  
H 103 0.23886 0.00000 0.75961 0.00154 0.76114  
C 104 -0.11533 1.99902 4.09661 0.01969 6.11533  
C 105 -0.07169 1.99924 4.05627 0.01618 6.07169  
H 106 0.23237 0.00000 0.76425 0.00339 0.76763  
C 107 0.50001 1.99901 3.46578 0.03520 5.49999  
C 108 0.09331 1.99915 3.87363 0.03392 5.90669  
H 109 0.25964 0.00000 0.73744 0.00292 0.74036  
C 110 -0.17431 1.99916 4.15820 0.01696 6.17431  
H 111 0.24509 0.00000 0.75316 0.00175 0.75491  
N 112 -0.31305 1.99929 5.29822 0.01555 7.31305  
C 113 0.11832 1.99915 3.85771 0.02482 5.88168  
H 114 0.26879 0.00000 0.72919 0.00202 0.73121  
C 115 0.50886 1.99901 3.46062 0.03151 5.49114  
C 116 -0.06516 1.99908 4.04966 0.01642 6.06516  
C 117 0.48933 1.99920 3.47872 0.03275 5.51067  
C 118 -0.06345 1.99923 4.04262 0.02160 6.06345  
C 119 -0.18609 1.99917 4.16660 0.02033 6.18609  
H 120 0.25367 0.00000 0.74489 0.00144 0.74633  
H 121 0.25424 0.00000 0.74420 0.00156 0.74576  
C 122 0.49977 1.99901 3.46597 0.03524 5.50023  
C 123 0.48945 1.99920 3.47858 0.03278 5.51055  
C 124 -0.25174 1.99919 4.21452 0.03803 6.25174  
H 125 0.23628 0.00000 0.76100 0.00272 0.76372  
C 126 -0.23196 1.99919 4.19444 0.03833 6.23196  
H 127 0.24815 0.00000 0.74911 0.00275 0.75185  
H 128 0.26339 0.00000 0.72986 0.00675 0.73661  
C 129 -0.06914 1.99924 4.05413 0.01577 6.06914  
H 130 0.23467 0.00000 0.76199 0.00335 0.76533  
C 131 -0.23367 1.99905 4.21507 0.01955 6.23367  
H 132 0.29016 0.00000 0.70500 0.00483 0.70984  
C 133 -0.15918 1.99897 4.14435 0.01586 6.15918  
H 134 0.24488 0.00000 0.75340 0.00172 0.75512  
C 135 -0.18984 1.99894 4.17386 0.01704 6.18984  
H 136 0.23952 0.00000 0.75916 0.00132 0.76048  
C 137 -0.18991 1.99893 4.17375 0.01722 6.18991  
H 138 0.24086 0.00000 0.75786 0.00128 0.75914  
C 139 -0.10312 1.99883 4.08513 0.01917 6.10312  
C 140 -0.18231 1.99917 4.16280 0.02035 6.18231  
H 141 0.25508 0.00000 0.74337 0.00155 0.74492

H 142 0.25456 0.00000 0.74391 0.00153 0.74544  
C 143 -0.17452 1.99916 4.15838 0.01698 6.17452  
H 144 0.24486 0.00000 0.75337 0.00177 0.75514  
C 145 -0.11306 1.99902 4.09476 0.01928 6.11306  
C 146 0.13254 1.99920 3.84818 0.02008 5.86746  
H 147 0.26437 0.00000 0.73434 0.00130 0.73563  
C 148 -0.19984 1.99914 4.18570 0.01500 6.19984  
C 149 -0.20313 1.99912 4.18646 0.01754 6.20313  
H 150 0.23863 0.00000 0.75977 0.00160 0.76137  
C 151 -0.06964 1.99908 4.05366 0.01690 6.06964  
C 152 0.12785 1.99919 3.85297 0.02000 5.87215  
C 153 -0.05954 1.99905 4.04474 0.01574 6.05954  
C 154 -0.15933 1.99897 4.14469 0.01567 6.15933  
H 155 0.24379 0.00000 0.75449 0.00172 0.75621  
C 156 0.04061 1.99885 3.94296 0.01758 5.95939  
C 157 -0.20404 1.99915 4.18957 0.01533 6.20404  
H 158 0.27222 0.00000 0.72641 0.00136 0.72778  
C 159 -0.10449 1.99883 4.08654 0.01912 6.10449  
C 160 0.01254 1.99910 3.97005 0.01831 5.98746  
C 161 0.03517 1.99885 3.94770 0.01828 5.96483  
C 162 -0.19560 1.99911 4.18199 0.01449 6.19560  
H 163 0.27016 0.00000 0.72844 0.00140 0.72984  
C 164 -0.18300 1.99917 4.16706 0.01676 6.18300  
H 165 0.25325 0.00000 0.74577 0.00098 0.74675  
C 166 -0.20562 1.99912 4.18887 0.01762 6.20562  
H 167 0.23999 0.00000 0.75845 0.00155 0.76001  
C 168 -0.18765 1.99894 4.17183 0.01689 6.18765  
H 169 0.23874 0.00000 0.75985 0.00140 0.76126  
C 170 0.02261 1.99905 3.96100 0.01734 5.97739  
C 171 0.12660 1.99918 3.85426 0.01995 5.87340  
H 172 0.26252 0.00000 0.73588 0.00160 0.73748  
C 173 0.12961 1.99921 3.85068 0.02050 5.87039  
H 174 0.26422 0.00000 0.73450 0.00128 0.73578  
C 175 0.13563 1.99920 3.84517 0.02000 5.86437  
H 176 0.26396 0.00000 0.73475 0.00129 0.73604  
C 177 -0.18244 1.99917 4.16300 0.02027 6.18244  
H 178 0.25513 0.00000 0.74326 0.00161 0.74487  
H 179 0.25441 0.00000 0.74404 0.00155 0.74559  
C 180 -0.20513 1.99912 4.18855 0.01747 6.20513  
H 181 0.23874 0.00000 0.75966 0.00160 0.76126  
C 182 -0.05644 1.99905 4.04189 0.01550 6.05644  
C 183 -0.18253 1.99917 4.16294 0.02043 6.18253  
H 184 0.25444 0.00000 0.74412 0.00144 0.74556  
H 185 0.25503 0.00000 0.74347 0.00151 0.74497



C 186 -0.17457 1.99916 4.15833 0.01709 6.17457  
H 187 0.24501 0.00000 0.75324 0.00175 0.75499  
C 188 -0.19039 1.99893 4.17418 0.01728 6.19039  
H 189 0.24139 0.00000 0.75735 0.00126 0.75861  
C 190 -0.20529 1.99912 4.18849 0.01768 6.20529  
H 191 0.23955 0.00000 0.75889 0.00156 0.76045  
C 192 -0.15862 1.99897 4.14386 0.01578 6.15862  
H 193 0.24474 0.00000 0.75353 0.00173 0.75526  
C 194 -0.19967 1.99912 4.18581 0.01474 6.19967  
H 195 0.27259 0.00000 0.72605 0.00137 0.72741  
C 196 -0.18898 1.99898 4.17508 0.01493 6.18898  
H 197 0.27171 0.00000 0.72674 0.00155 0.72829  
C 198 -0.15880 1.99897 4.14414 0.01569 6.15880  
H 199 0.24402 0.00000 0.75426 0.00172 0.75598  
C 200 -0.20471 1.99915 4.19012 0.01544 6.20471  
H 201 0.27255 0.00000 0.72605 0.00140 0.72745  
C 202 -0.18242 1.99917 4.16286 0.02039 6.18242  
H 203 0.25508 0.00000 0.74339 0.00153 0.74492  
H 204 0.25462 0.00000 0.74391 0.00147 0.74538  
C 205 0.13560 1.99920 3.84514 0.02006 5.86440  
H 206 0.26411 0.00000 0.73466 0.00123 0.73589  
C 207 0.12387 1.99920 3.85649 0.02044 5.87613  
H 208 0.26330 0.00000 0.73518 0.00152 0.73670  
C 209 -0.18536 1.99897 4.17170 0.01469 6.18536  
H 210 0.27006 0.00000 0.72841 0.00153 0.72994  
C 211 0.12280 1.99920 3.85773 0.02028 5.87720  
H 212 0.26238 0.00000 0.73597 0.00165 0.73762

C 213 -0.18689 1.99898 4.17336 0.01455 6.18689  
H 214 0.26956 0.00000 0.72888 0.00156 0.73044  
C 215 0.12120 1.99918 3.85943 0.02018 5.87880  
H 216 0.26030 0.00000 0.73826 0.00144 0.73970  
H 217 0.19002 0.00000 0.80832 0.00166 0.80998  
H 218 0.16781 0.00000 0.83016 0.00203 0.83219  
H 219 0.18973 0.00000 0.80862 0.00166 0.81027  
H 220 0.17558 0.00000 0.81998 0.00444 0.82442  
H 221 0.18142 0.00000 0.81668 0.00190 0.81858  
H 222 0.17458 0.00000 0.82159 0.00383 0.82542  
H 223 0.18674 0.00000 0.81133 0.00193 0.81326  
H 224 0.17849 0.00000 0.81943 0.00208 0.82151  
H 225 0.27083 0.00000 0.72781 0.00136 0.72917  
H 226 0.26367 0.00000 0.73485 0.00148 0.73633

=====  
=====  
\* Total \* 6.04503 251.89592 627.06408 2.99496  
881.95497

Natural Population

-----  
Core 251.89592 ( 99.9587% of 252)  
Valence 627.06408 ( 99.5340% of 630)  
Natural Minimal Basis 878.96000 ( 99.6553% of 882)  
Natural Rydberg Basis 2.99496 ( 0.3396% of 882)  
-----

## 7. Cartesian Coordinates for the Optimized Structures

### AzaEx<sup>2</sup>Cage<sup>6+</sup>

|                                      |                                      |
|--------------------------------------|--------------------------------------|
| C -2.50609600 -0.25106100 4.60305900 | C -3.72935700 2.97774500 3.48260000  |
| C -1.41975700 -0.79011100 5.47047800 | N -4.46087900 0.70910600 3.06052100  |
| N -2.58764800 1.07378000 4.45386000  | C 0.63361300 -1.80749600 7.07928300  |
| C -1.40456300 -2.14276900 5.81997300 | H -0.41233100 -3.69147100 6.92725100 |
| C -0.41389700 0.05631700 5.95057600  | H 1.37443900 0.22174500 7.12185100   |
| N -3.32133800 -1.12894900 4.01221100 | C -5.18800900 -1.53568800 2.52224500 |
| C -3.58996700 1.50726300 3.68381800  | C -4.79008100 3.48872300 2.73009100  |
| C -0.38706200 -2.64656600 6.62552200 | C -2.79983300 3.85823900 4.04719900  |
| H -2.20453400 -2.78981800 5.47755900 | C 1.76279000 -2.35913400 7.91930700  |
| C 0.60812000 -0.45055800 6.74268100  | C -6.28936400 -1.04473800 1.81678100 |
| H -0.44879500 1.11215500 5.70660600  | C -4.93438800 -2.91197100 2.53207800 |
| C -4.28103200 -0.60114700 3.24734800 | C -4.90555100 4.85972300 2.52226000  |

H -5.52943500 2.80791200 2.32388000  
C -2.91188700 5.22615800 3.83153300  
H -2.00112100 3.46229800 4.66427500  
N 2.99108800 -2.56704000 7.06611600  
H 2.05460800 -1.68039000 8.72306700  
H 1.51817700 -3.32941100 8.35896700  
C -7.11118500 -1.91549800 1.10691100  
H -6.50570600 0.01740400 1.83855000  
C -5.74968200 -3.77831900 1.81546500  
H -4.09912500 -3.29239500 3.10930600  
C -3.95828300 5.73575400 3.05768400  
H -5.75870800 5.24483100 1.96806300  
H -2.19362600 5.89997800 4.29336500  
C 2.92317700 -3.46305100 6.06251600  
C 4.10631000 -1.84023100 7.26103800  
C -6.83595900 -3.28457200 1.08722000  
H -7.98610300 -1.52452500 0.59217700  
H -5.54901000 -4.84708600 1.84295400  
C -4.04699100 7.22002100 2.78120500  
C 3.96653000 -3.61077000 5.17165100  
H 1.99732500 -4.02215000 5.98145000  
C 5.18038000 -1.93663400 6.38834800  
H 4.11295000 -1.17570700 8.11847800  
C -7.68198400 -4.22421700 0.25750400  
N -3.12767300 7.57233100 1.63892500  
H -3.73503100 7.82596500 3.63402400  
H -5.05188600 7.53110600 2.48664200  
C 5.10678700 -2.80647600 5.29647700  
H 3.85692100 -4.31936500 4.35813700  
H 6.06085500 -1.33203000 6.58202500  
N -6.96168400 -4.54026400 -1.02984300  
H -7.86400900 -5.17840600 0.75585900  
H -8.64556900 -3.78815000 -0.01656200  
C -3.48303200 7.20893200 0.39169600  
C -1.93014200 8.14029000 1.87262200  
C 6.13366400 -2.82225100 4.21744900  
C -6.83545300 -3.56441500 -1.95010800  
C -6.37126100 -5.73565100 -1.21268300  
C -2.60044500 7.33516900 -0.66322800  
H -4.47399300 6.78364400 0.27746500  
C -1.00042100 8.28104800 0.85470700  
H -1.73161600 8.45832300 2.89068100  
C 6.50248600 -4.00381200 3.56664900  
C 6.67284100 -1.61728900 3.75029200

C -6.03820700 -3.73851500 -3.06362500  
H -7.35932000 -2.63764600 -1.74276400  
C -5.54865800 -5.96217200 -2.30511300  
H -6.55762400 -6.49316500 -0.45885600  
C -1.31155600 7.83056000 -0.43222000  
H -2.91301300 6.99459000 -1.64435000  
H -0.04505300 8.74265800 1.08326400  
C 7.30324800 -3.94204100 2.43724900  
H 6.17851200 -4.97708200 3.92104200  
C 7.45766200 -1.61471200 2.61364300  
H 6.44810500 -0.66949800 4.22736400  
C -5.33380600 -4.93710000 -3.23173600  
H -5.93381400 -2.91507300 -3.76170500  
H -5.08900600 -6.93918800 -2.41551900  
C -0.28312900 7.75459900 -1.50687400  
N 7.72797100 -2.75888000 1.95665600  
H 7.60326300 -4.82782100 1.88759600  
H 7.85654400 -0.70394600 2.18046100  
C -4.30416400 -5.04253000 -4.30289300  
C -0.57990800 8.00362700 -2.84988600  
C 1.00747700 7.31300700 -1.18826700  
C 8.40547200 -2.67382000 0.61165800  
C -4.48713500 -4.48489300 -5.57186500  
C -3.06247600 -5.62109400 -4.01060300  
C 0.37331800 7.73754400 -3.82222300  
H -1.53932300 8.40477700 -3.16119600  
C 1.91053500 7.05150700 -2.19788200  
H 1.30366700 7.11776700 -0.16346700  
C 7.41609700 -2.16060700 -0.41061100  
H 8.76976600 -3.67654500 0.37951500  
H 9.26653600 -2.01208600 0.73084800  
C -3.42516300 -4.44781300 -6.46299800  
H -5.44326600 -4.07975900 -5.88785600  
C -2.03765600 -5.54446800 -4.93185600  
H -2.86529900 -6.08819000 -3.05190100  
N 1.57639100 7.23503000 -3.48997400  
H 0.18791800 7.90597200 -4.87793600  
H 2.90232700 6.65390200 -2.01183000  
C 6.47602300 -3.02997800 -0.97143200  
C 7.40656300 -0.81185700 -0.77344900  
N -2.21889400 -4.93509000 -6.11977400  
H -3.51470700 -4.01668900 -7.45450000  
H -1.04260500 -5.92975100 -4.73713600  
C 2.55994200 6.79609400 -4.54851400

C 5.52200800 -2.55272200 -1.86098800  
H 6.49931700 -4.09082100 -0.73192400  
C 6.44518800 -0.33000700 -1.65729600  
H 8.16643100 -0.13443400 -0.39054100  
C -1.01854400 -4.73997300 -7.01318400  
C 2.78583000 5.30457300 -4.45392700  
H 2.13559600 7.09472300 -5.50909500  
H 3.47695800 7.36711200 -4.38249500  
C 5.48789000 -1.19427800 -2.19504600  
H 4.79957100 -3.22675500 -2.30718800  
H 6.43951900 0.71556200 -1.94410800  
C -0.04731900 -3.77741400 -6.36785400  
H -1.39811800 -4.37259400 -7.96848500  
H -0.57998700 -5.72794800 -7.17286300  
C 1.82672000 4.41777200 -4.95349000  
C 3.93991600 4.79973300 -3.85069400  
C 4.42724800 -0.67430700 -3.10384300  
C -0.29362100 -2.40148400 -6.40387700  
C 1.09613600 -4.25352300 -5.72279600

C 2.00951700 3.04648400 -4.83225600  
H 0.94250400 4.79770100 -5.46055000  
C 4.11810800 3.42547600 -3.71656200  
H 4.71977600 5.47629500 -3.50791800  
N 3.61075000 -1.56103400 -3.67970500  
N 4.33210000 0.64914700 -3.25805700  
C 0.58223200 -1.51596100 -5.78929300  
H -1.15921500 -2.01441300 -6.93716300  
C 1.96886800 -3.36814000 -5.09619200  
H 1.33087500 -5.31556000 -5.73557700  
C 3.14874300 2.54082800 -4.19574400  
H 1.27837300 2.35508200 -5.23562500  
H 5.01678900 3.03190600 -3.25513800  
C 2.64415900 -1.04561600 -4.44365800  
C 3.32381500 1.06988900 -4.02669700  
C 1.71268500 -1.99486900 -5.11759500  
H 0.40694600 -0.44707600 -5.83628800  
H 2.86486800 -3.73534300 -4.60827700  
N 2.44585600 0.26262300 -4.62866700

(pyrene)<sub>2</sub> C AzaEx<sup>2</sup>Cage<sup>6+</sup>

C 1.24790000 0.30400300 1.26900100  
C 1.61759300 -1.05632200 1.09373300  
C 2.13589100 1.33701100 0.86420800  
C 2.86757300 -1.35663400 0.54089700  
C 0.69875900 -2.08302300 1.51075300  
C -0.00844500 0.63250300 1.86309500  
C 3.37453700 0.99161600 0.31037600  
C 1.74257000 2.70603700 1.07533400  
C 3.74021600 -0.34201100 0.16060600  
H 3.15416900 -2.39913200 0.42328000  
C -0.49634300 -1.77294000 2.07001600  
H 0.98563900 -3.12091700 1.35669600  
C -0.36533700 1.99226700 2.06670300  
C -0.89318100 -0.40309700 2.27009900  
H 4.06605400 1.78452400 0.03117500  
C 0.55685900 3.01852400 1.65507600  
H 2.43430100 3.48991400 0.77558100  
H 4.71427600 -0.59379900 -0.24827700  
H -1.18459300 -2.55700500 2.37582000  
C -1.59473500 2.29107200 2.66767500  
C -2.11815400 -0.06208800 2.85238700  
H 0.28021200 4.05686900 1.82147400

C -2.46141100 1.27251000 3.04834200  
H -1.85843500 3.33421400 2.83083300  
H -2.79494400 -0.85563800 3.15951400  
H -3.41239000 1.51497600 3.51943600  
C -4.84726500 3.99113700 4.18028500  
C -3.92381600 3.97779300 5.20585800  
C -5.92622000 3.09784200 4.20809700  
H -4.68534800 4.66130900 3.34287700  
N -4.05582800 3.13143600 6.24502500  
H -3.04134600 4.60803900 5.21021000  
C -6.07955400 2.28467700 5.33468400  
C -6.78815900 2.94757700 3.00461500  
C -2.92633300 3.04675200 7.24133600  
C -5.12725500 2.32450800 6.34189000  
H -6.92866100 1.61815400 5.44902800  
C -7.16151000 4.03769800 2.21272600  
C -7.15053800 1.66462700 2.57589200  
C -1.70429500 2.46645600 6.57050900  
H -3.28471200 2.42981400 8.06757700  
H -2.75800300 4.06006400 7.61434600  
H -5.19309800 1.70521900 7.23021700  
C -7.78272100 3.81489800 0.99352100

H -6.97650300 5.06131100 2.52286800  
C -7.76255900 1.50281600 1.34978100  
H -6.91376800 0.78161400 3.15936200  
C -1.59401200 1.08635400 6.38886400  
C -0.68500700 3.30672000 6.11326100  
N -8.02834200 2.56397000 0.56424000  
H -8.07333900 4.62428500 0.33204400  
H -8.01624200 0.52923100 0.94520200  
C -0.48133800 0.55037800 5.75123300  
H -2.36607400 0.42053600 6.76850800  
C 0.42463900 2.77251400 5.46876800  
H -0.73317400 4.37784400 6.29830900  
C -8.46380400 2.30518500 -0.85655600  
C 0.53071700 1.39137100 5.28114500  
H -0.38001300 -0.52160500 5.62128800  
H 1.22886600 3.41618600 5.12968900  
C -7.27697900 1.78237400 -1.63324100  
H -8.84558600 3.24987400 -1.24806500  
H -9.28758000 1.58889000 -0.81184300  
C 1.73707700 0.82062100 4.62072400  
C -6.32795300 2.67194000 -2.14711100  
C -7.08908300 0.40777800 -1.79381500  
N 2.64981200 1.67617900 4.15601300  
N 1.84058400 -0.50982900 4.54494400  
C -5.19431900 2.19212800 -2.79052900  
H -6.48427300 3.74542400 -2.06558600  
C -5.94997100 -0.07440000 -2.43218600  
H -7.84677500 -0.29327800 -1.45016200  
C 3.73735000 1.12079700 3.61618100  
C 2.97055200 -0.96684500 4.00150000  
C -4.99001700 0.81429000 -2.92211900  
H -4.45729100 2.87648200 -3.19583300  
H -5.79924500 -1.14027300 -2.56361900  
C 4.77079700 2.03308000 3.05038100  
N 3.95228700 -0.19288100 3.53020900  
C 3.15283700 -2.44340400 3.91346800  
C -3.75045900 0.29594300 -3.56571900  
C 5.99203500 1.52546200 2.60070100  
C 4.51004800 3.40315800 2.93914600  
C 4.36615200 -2.97738200 3.47352000  
C 2.11676600 -3.30542800 4.29091100  
N -2.86044500 1.18179100 -4.01687400  
N -3.60383900 -1.02886900 -3.64228700  
C 6.93205000 2.37284900 2.02109000

H 6.20048800 0.46737700 2.71500800  
C 5.44370400 4.24594700 2.34770800  
H 3.57197000 3.79368600 3.31864100  
C 4.54007200 -4.35723600 3.40238000  
H 5.17554400 -2.30626100 3.20817800  
C 2.28636100 -4.68132500 4.20641100  
H 1.18620900 -2.88399600 4.65456700  
C -1.75405000 0.65936400 -4.55374900  
C -2.46684700 -1.45373700 -4.19551200  
C 6.65634100 3.73484300 1.87532000  
H 7.89373100 1.97215800 1.70799700  
H 5.23557700 5.31170700 2.27874400  
C 3.49773800 -5.21681000 3.75729400  
H 5.50401500 -4.76095200 3.09969300  
H 1.47977300 -5.34132800 4.51805700  
C -0.74431200 1.60504300 -5.11081500  
N -1.50088900 -0.64762800 -4.64899500  
C -2.27134700 -2.92531600 -4.31940900  
C 7.63760900 4.64455200 1.17088100  
C 3.66293400 -6.71331200 3.63127400  
C -1.04744500 2.96275000 -5.23523200  
C 0.49211700 1.13097000 -5.56486900  
C -3.27866400 -3.80188800 -3.90453900  
C -1.09130500 -3.43940600 -4.86291900  
N 7.16223700 4.86587700 -0.24347200  
H 7.71277500 5.62955900 1.63567700  
H 8.63945700 4.21342000 1.10719700  
N 2.96626000 -7.19732900 2.38170700  
H 3.21510800 -7.25536900 4.46634500  
H 4.71087800 -7.01196300 3.54503700  
C -0.13252800 3.83494900 -5.81985600  
H -2.01512000 3.32236800 -4.90376100  
C 1.40874600 2.00440500 -6.13655100  
H 0.71221900 0.07237000 -5.48110000  
C -3.09866600 -5.17603100 -4.01074500  
H -4.20387300 -3.39693400 -3.50988600  
C -0.91162500 -4.81420400 -4.96682000  
H -0.32470100 -2.75331500 -5.20621300  
C 7.20050400 3.82350800 -1.09556200  
C 6.59851100 6.03128300 -0.60934100  
C 3.36872100 -6.69126100 1.19988900  
C 1.93078600 -8.05363800 2.44506300  
C 1.10059900 3.36192500 -6.27362700  
H -0.40489900 4.87848200 -5.96225500

H 2.35282900 1.61718600 -6.51376100  
C -1.90830800 -5.69022700 -4.53209300  
H -3.90485200 -5.84578900 -3.71923300  
H 0.00449100 -5.20174000 -5.40767200  
C 6.58276200 3.89288000 -2.32748400  
H 7.69775600 2.92814800 -0.73842700  
C 5.95316600 6.15504200 -1.83059500  
H 6.65600400 6.84653000 0.10442500  
C 2.68477500 -6.97813800 0.03799300  
H 4.22124800 -6.02200800 1.23120900  
C 1.19858800 -8.37035500 1.30908500  
H 1.69312700 -8.46178800 3.42205100  
C 2.09296400 4.30658900 -6.91326800  
C -1.68352300 -7.18353000 -4.58689900  
C 5.89093000 5.05517800 -2.69134100  
H 6.59835400 3.01626900 -2.96558500  
H 5.50435100 7.10970900 -2.08653200  
C 1.54785700 -7.79584900 0.08446700  
H 3.01373500 -6.51713800 -0.88701300  
H 0.36656100 -9.06133600 1.40231100  
N 3.17526800 4.66209100 -5.92562500  
H 2.59303000 3.86407000 -7.77706900  
H 1.63014000 5.24543000 -7.22713100  
N -0.85840500 -7.59805600 -3.39477900  
H -1.13077800 -7.49646200 -5.47478900  
H -2.61575300 -7.75124800 -4.54142800  
C 5.01512000 5.03646600 -3.89489700  
C 0.70170400 -7.90839300 -1.13427400  
C 2.83889200 5.40057000 -4.85023000  
C 4.42375500 4.18013000 -6.06394800  
C -1.44080600 -7.60795500 -2.18059000  
C 0.45913200 -7.83595700 -3.52625700  
C 5.36623000 4.35105700 -5.06150900  
C 3.73974900 5.61182400 -3.82662200  
C 1.26568900 -7.99437100 -2.41113000

C -0.68821500 -7.77365200 -1.03362500  
H 1.82108600 5.77438400 -4.82367100  
H 4.64109400 3.64209800 -6.98066000  
H -2.51184200 -7.43735900 -2.15975200  
H 0.84987800 -7.87269800 -4.53764300  
H 6.36077000 3.94213800 -5.20872000  
H 3.41775500 6.17870000 -2.96002000  
H 2.32601000 -8.17492000 -2.55699100  
H -1.18759600 -7.72983200 -0.07144400  
C -2.82949300 1.42963600 -0.48382900  
C -1.98272700 2.45357900 -0.89365100  
C -2.46450400 0.08936500 -0.65241400  
H -3.79581400 1.65983500 -0.04006700  
C -0.74930600 2.16104700 -1.46684000  
H -2.28367200 3.48904400 -0.76326800  
C -1.20727000 -0.21557600 -1.23766900  
C -3.33122800 -0.99534400 -0.27139100  
C -0.33983400 0.83515400 -1.64164100  
H -0.08907000 2.96452800 -1.78291300  
C -0.81054600 -1.57639100 -1.40976100  
C -2.96224900 -2.28838200 -0.44633900  
H -4.30135500 -0.74918700 0.15420100  
C 0.93152000 0.49689000 -2.22689500  
C 0.45887900 -1.87837800 -1.97370500  
C -1.68010300 -2.62612500 -1.00961200  
H -3.62930100 -3.09804900 -0.16086300  
C 1.31336600 -0.79350000 -2.38332200  
H 1.58381500 1.30913900 -2.53816800  
C 0.84417100 -3.21571000 -2.10361500  
C -1.26040700 -3.95333000 -1.16630300  
H 2.28161700 -1.03645000 -2.81383800  
C -0.01072600 -4.23953100 -1.70404400  
H 1.81387300 -3.44559500 -2.53924500  
H -1.93180900 -4.75557100 -0.86705500  
H 0.29889600 -5.27381600 -1.83692100

**(PCA)<sub>2</sub> c AzaEx<sup>2</sup>Cage<sup>6+</sup>**

C 0.29695700 0.12712500 1.70317000  
C -0.31289700 -1.09853700 2.07251800  
C -0.32786600 1.35718300 2.04697900  
C -1.52551600 -1.07612700 2.77555500  
C 0.34139400 -2.32533300 1.72064000  
C 1.53872900 0.12265900 0.99555800  
C -1.53408300 1.33736500 2.75316300

C 0.30464600 2.59000500 1.66107100  
C -2.12312500 0.12916200 3.11695500  
H -1.98519600 -2.02032700 3.05751500  
C 1.52024700 -2.33979100 1.04628600  
H -0.13297000 -3.26144600 2.00620300  
C 2.13893200 1.36296900 0.63508400  
C 2.16188600 -1.11202400 0.65364800

H -2.00760700 2.28011600 3.01603800  
C 1.47940900 2.59325100 0.98527400  
H -0.18324200 3.52368700 1.93166900  
H -3.05989600 0.13231000 3.66809200  
H 1.99621000 -3.27575000 0.78692500  
C 3.36475700 1.36204300 -0.04015100  
C 3.39437100 -1.06962500 -0.04482300  
H 1.95728500 3.52769300 0.70146300  
C 3.97619200 0.16372200 -0.36455600  
H 3.83510100 2.30741900 -0.29515600  
C 4.16783200 -2.25652200 -0.45975000  
H 4.93531000 0.17414300 -0.87829600  
O 3.84855100 -3.42915400 -0.38310300  
H 5.15395000 -1.99178600 -0.90123600  
C 6.55792300 -4.71320200 -1.12657700  
N 6.39108400 -5.51595800 -0.06082100  
C 5.81499000 -4.89712700 -2.27569600  
H 7.27220700 -3.90501800 -1.01148800  
C 7.03706000 -5.13425100 1.24177200  
C 5.55593000 -6.56828800 -0.11613900  
C 4.86176400 -5.91852000 -2.32280500  
H 5.94515900 -4.19676500 -3.09326200  
C 6.25618000 -3.99295800 1.85039000  
H 7.03949000 -6.02803500 1.86865100  
H 8.07259500 -4.86471900 1.02289400  
C 4.78287700 -6.79794900 -1.23906100  
H 5.51646800 -7.20593300 0.76006000  
C 3.87518600 -5.97704900 -3.43363600  
C 6.72527700 -2.68252700 1.74042900  
C 5.03217100 -4.23770200 2.47619700  
H 4.12708700 -7.66187700 -1.24689700  
C 4.17578500 -5.57794500 -4.73964500  
C 2.55393200 -6.34577700 -3.14949900  
C 5.96623700 -1.62542500 2.23215300  
H 7.69906900 -2.48453100 1.29784900  
C 4.27173700 -3.18388300 2.96810100  
H 4.66969400 -5.25658500 2.59167400  
C 3.15767900 -5.46988100 -5.67519800  
H 5.18958000 -5.34617100 -5.04981500  
C 1.58160500 -6.21744100 -4.11819800  
H 2.25941600 -6.67987200 -2.16094100  
C 4.73075600 -1.86981400 2.83956700  
H 6.32886600 -0.60599900 2.15884200  
H 3.32128300 -3.36677300 3.45729200

N 1.88349700 -5.74806100 -5.34334700  
H 3.33710300 -5.14701600 -6.69544500  
H 0.53599500 -6.43986000 -3.93442500  
C 3.90485800 -0.73140900 3.32699800  
C 0.74412300 -5.45575400 -6.28470100  
N 2.77901700 -1.00887900 3.99312800  
N 4.33598900 0.50170200 3.05607100  
C -0.10370900 -4.33366800 -5.72885400  
H 1.19073100 -5.20309000 -7.24846600  
H 0.18095500 -6.38535400 -6.39879400  
C 2.07968100 0.05022800 4.40510200  
C 3.55758600 1.49514500 3.49223000  
C 0.32849700 -3.00817700 -5.84407300  
C -1.31916500 -4.60735900 -5.09892700  
C 0.84649000 -0.19868800 5.20550700  
N 2.41908300 1.32161300 4.16598100  
C 3.99239800 2.88997900 3.19811100  
C -0.44826000 -1.97249900 -5.34451400  
H 1.25834000 -2.77997600 -6.36065000  
C -2.09383200 -3.56900600 -4.58585100  
H -1.68926000 -5.62877600 -5.04186400  
C 0.12922900 0.87380800 5.74027800  
C 0.42620500 -1.50658300 5.47047600  
C 5.15984800 3.12281100 2.46661200  
C 3.24308300 3.97670100 3.66154300  
C -1.66640900 -2.24649700 -4.71069800  
H -0.13184200 -0.94100400 -5.45501000  
H -3.04685100 -3.77623000 -4.11155400  
C -0.98291000 0.64323400 6.54458700  
H 0.47168000 1.88558200 5.55290600  
C -0.69158500 -1.73547400 6.26369700  
H 0.99679400 -2.33689700 5.06804300  
C 5.56547000 4.42491400 2.18774400  
H 5.75340600 2.27760800 2.13576600  
C 3.65098700 5.27582300 3.38507200  
H 2.35136500 3.78990200 4.24975400  
C -2.50987400 -1.12680300 -4.20732900  
C -1.40032700 -0.66222400 6.81209300  
H -1.49017700 1.48769900 7.00618100  
H -0.98280100 -2.75821300 6.49301300  
C 4.81049600 5.50932600 2.63941000  
H 6.49569600 4.59112300 1.64927900  
H 3.07693900 6.11072000 3.78137100  
N -3.64557800 -1.42931800 -3.56996900

N -2.08078900 0.11622800 -4.42989400  
C -2.59057500 -0.91516200 7.70948300  
C 5.21748000 6.92435100 2.28793700  
C -4.36760600 -0.38546100 -3.15702900  
C -2.88546200 1.09309800 -4.00232400  
N -3.84265100 -1.08600900 6.88686600  
H -2.47978100 -1.82661000 8.30014900  
H -2.77837800 -0.08452500 8.39398300  
N 4.42334400 7.36552100 1.08868100  
H 5.00793700 7.63628500 3.08893700  
H 6.27397200 7.00378300 2.02288400  
C -5.60804200 -0.67106400 -2.38197500  
N -4.03664500 0.89424500 -3.35634500  
C -2.46124200 2.49555800 -4.26874100  
C -4.40124300 0.00480300 6.32978400  
C -4.34409700 -2.31144900 6.64598800  
C 4.80125800 6.94177800 -0.13254300  
C 3.26716500 8.03431700 1.25658600  
C -6.07500000 -1.98187200 -2.25678200  
C -6.28412500 0.36610200 -1.73104600  
C -3.32414400 3.56061500 -3.99669800  
C -1.19656300 2.75189400 -4.80888800  
C -5.44831200 -0.11218900 5.43645800  
H -3.96305300 0.96053300 6.59658600  
C -5.38829400 -2.48945300 5.75263700  
H -3.88070200 -3.13938000 7.17185300  
C 3.96477200 7.08523600 -1.22281600  
H 5.76584700 6.44995500 -0.19642700  
C 2.38585800 8.19815200 0.20301000  
H 3.05978600 8.40477100 2.25490300  
C -7.17714600 -2.25884900 -1.45392500  
H -5.56967800 -2.77827800 -2.79174800  
C -7.37233700 0.08631600 -0.91221800  
H -5.93891900 1.38572200 -1.86497100  
C -2.92791000 4.86781900 -4.26979500  
H -4.31180200 3.35659000 -3.59669400  
C -0.80101600 4.05619300 -5.07369300  
H -0.53992200 1.91798200 -5.03028800  
C -5.92888500 -1.38164200 5.09168300  
H -5.84392300 0.78997200 4.98241400  
H -5.76692400 -3.49370000 5.59120400  
C 2.70086800 7.66058900 -1.04954600  
H 4.28374500 6.68944100 -2.18107900  
H 1.45670000 8.73147900 0.37599800

C -7.81444000 -1.23044700 -0.75369000  
H -7.55357100 -3.27784700 -1.39350700  
H -7.89150500 0.90130300 -0.41239500  
C -1.66387900 5.12234500 -4.80826000  
H -3.62278000 5.68634100 -4.09505400  
H 0.17841400 4.24149600 -5.50853100  
C -6.89019900 -1.52519700 3.96385100  
C 1.67844200 7.56116000 -2.12510600  
C -8.92862800 -1.54365300 0.21922600  
C -1.21758000 6.53835000 -5.08576000  
C -7.88117900 -0.57408000 3.70215400  
C -6.73369500 -2.57865700 3.05384000  
C 0.39247600 7.14586100 -1.77463600  
C 1.97227100 7.74144400 -3.48157400  
N -8.34472500 -1.60253000 1.61143100  
H -9.70683000 -0.77821200 0.23623900  
H -9.39621400 -2.51270000 0.02872100  
N -0.20176300 6.97565700 -4.06032800  
H -0.73543400 6.63574900 -6.06044300  
H -2.04474700 7.25140600 -5.03638900  
C -8.59335600 -0.63606500 2.51322000  
H -8.11020900 0.22374500 4.40161700  
C -7.46858300 -2.58825500 1.88625400  
H -6.00404400 -3.36506100 3.21205800  
C -0.52208600 6.84558000 -2.76276000  
H 0.11152000 6.97755000 -0.74141200  
C 1.00747400 7.44530400 -4.42959000  
H 2.93607600 8.11122200 -3.81675400  
H -9.35349300 0.09303300 2.25161000  
H -7.34354300 -3.34768100 1.12264600  
H -1.51097900 6.45502000 -2.55257000  
H 1.18162700 7.56248000 -5.49399400  
C -1.32247300 3.75382100 -1.36854200  
C -1.79764400 2.40443000 -1.01095500  
O -0.27406100 4.07004800 -1.89799000  
H -2.05366000 4.54672300 -1.09320100  
C -3.02566200 2.37186400 -0.34124800  
C -1.12254600 1.19729400 -1.31976900  
C -3.60923700 1.17762700 0.04311500  
H -3.53232300 3.31031600 -0.12581800  
C -1.73987500 -0.03214200 -0.94828600  
C 0.13737900 1.15022800 -2.01598900  
C -2.98743200 -0.03749700 -0.26016200  
H -4.56547400 1.17270500 0.55928100

C -1.11417700 -1.27620000 -1.26648100  
C 0.72760600 -0.03790600 -2.31101100  
H 0.60718800 2.08396800 -2.29664300  
C -3.60258200 -1.29463700 0.07221200  
C 0.13042300 -1.28995000 -1.94617800  
C -1.74220100 -2.50434800 -0.91976500  
H 1.68549100 -0.05557800 -2.82611100  
C -3.01408100 -2.47175900 -0.24881800

H -4.57878200 -1.26957100 0.55402700  
C 0.73970700 -2.52034700 -2.23225600  
C -1.11353800 -3.71001300 -1.23985300  
H -3.49770800 -3.41802700 -0.01848200  
C 0.12218300 -3.71238200 -1.88086200  
H 1.70226500 -2.52854400 -2.73885600  
H -1.59739400 -4.64731600 -0.97725300  
H 0.60838800 -4.65674100 -2.10033700

### **BH4EN • AzaEx<sup>2</sup>Cage<sup>6+</sup>**

O 7.71577400 -2.85126900 1.73436200  
O 6.20909500 -5.16501700 2.16828800  
C 7.18002600 0.48800300 0.40075100  
O 3.77759100 -5.66412400 1.09956200  
C 7.59799400 0.32735400 -0.94884700  
H 7.57630400 1.18853200 -1.60734700  
C 8.14603300 -0.86663900 -1.34619900  
H 8.54190500 -0.97200400 -2.35227000  
C 7.79061700 -1.84447800 0.83269200  
C 8.23359000 -1.97196700 -0.46732100  
H 8.67918100 -2.89421100 -0.82006600  
C 8.17075900 -4.13944500 1.34456700  
H 9.26644900 -4.16182500 1.31735700  
H 7.77595400 -4.38935000 0.35062000  
C 7.61936500 -5.14010300 2.32939600  
H 8.04921200 -6.12498800 2.10377800  
H 7.88487100 -4.87301000 3.35965100  
O 5.92539500 -3.36786000 -3.56489700  
H 6.62879500 -2.86447200 -3.99937200  
C 5.62680000 -6.40834100 2.50519900  
H 5.85076100 -6.69019100 3.54340200  
H 6.02906300 -7.19754200 1.85345400  
C 4.12425500 -6.26130800 2.33881400  
H 3.63662600 -7.23929500 2.45197200  
H 3.72646300 -5.59572200 3.11263600  
O 4.56286000 -4.90122800 -1.67151200  
C 3.87216000 -6.54417900 -0.00706200  
H 4.88654700 -6.95628400 -0.09902200  
H 3.17416700 -7.38372800 0.12576700  
C 6.52205700 -4.51619200 -2.96768500  
C 3.51829000 -5.76367900 -1.25835300  
H 3.25365500 -6.45615500 -2.06834600  
H 2.64533200 -5.13638300 -1.04383900  
C 5.43229100 -5.49918000 -2.61958500

O 6.21149000 2.58192000 -0.10287600  
O 5.96663400 4.25229100 -2.32913200  
C 7.32542900 -0.58122200 1.32262300  
O 8.64234900 3.13626200 -1.92925400  
C 7.01572000 -0.38893700 2.69235300  
H 7.20956700 -1.19299900 3.39444900  
C 6.54125300 0.83053300 3.11964800  
H 6.35293700 1.00171500 4.17554100  
C 6.58524900 1.69769100 0.86922100  
C 6.28834100 1.87460000 2.20299500  
H 5.90419500 2.82229900 2.56088400  
C 6.44443100 3.98241000 0.05772000  
H 6.11073600 4.32644800 1.04277800  
H 7.51881900 4.15852800 -0.04589000  
C 5.63024700 4.67105600 -1.01935600  
H 5.73329900 5.75981200 -0.91892600  
H 4.57116000 4.41805200 -0.88701800  
O 7.96847800 4.31632500 2.74975700  
H 8.19183600 4.88330800 1.99699800  
C 7.17071100 4.81413900 -2.85676000  
H 6.92225200 5.34104000 -3.78568700  
H 7.59013700 5.54531300 -2.15466200  
C 8.18548400 3.72067300 -3.12817900  
H 9.01778600 4.12559400 -3.71904600  
H 7.70730300 2.93103800 -3.72434400  
O 9.56328800 3.45817500 0.80331100  
C 9.94862600 3.54481100 -1.54235500  
H 9.99311500 4.63559300 -1.40926800  
H 10.67365200 3.25980200 -2.31657300  
C 9.19439100 3.70914900 3.12643500  
C 10.30231400 2.86390500 -0.24184100  
H 11.38015400 2.97079300 -0.05476100  
H 10.06868100 1.79055400 -0.31793300  
C 9.70235200 2.77434800 2.03723700



|               |             |             |               |             |             |
|---------------|-------------|-------------|---------------|-------------|-------------|
| N 4.38045200  | -1.93832100 | 1.43183500  | C 4.44859600  | 1.95920600  | -3.68260100 |
| N -3.19159900 | 1.83873100  | -5.30069200 | H 4.63928400  | 3.02095500  | -3.81283300 |
| N -4.01146500 | -2.35036800 | 4.74827300  | C -2.34430700 | 2.75481300  | -4.82025700 |
| N 3.87915800  | 1.28093000  | -4.70022800 | C -4.66889400 | 1.87812300  | 7.42405100  |
| N -2.71348300 | 3.78239500  | -4.04786900 | C -4.46846600 | 1.98553300  | -4.94441400 |
| N -2.21264900 | -3.39722300 | 3.62622100  | C 0.04466800  | -2.53313700 | 3.82753900  |
| N -1.82546500 | -1.47353800 | 4.94128000  | C 3.31168700  | 2.02285700  | -5.86710300 |
| N -4.92878100 | 2.96444700  | -4.15987800 | H 3.50869700  | 1.42913200  | -6.76225900 |
| N -5.44707900 | 4.18217300  | 7.07138400  | H 3.86507000  | 2.96053200  | -5.94730000 |
| C 4.86978800  | -2.04585900 | -0.88273400 | C -3.49869200 | -3.30319400 | 3.96538500  |
| H 5.18206400  | -2.64125400 | -1.73569300 | C -4.01298100 | 3.84857200  | -3.75378500 |
| N -7.63136900 | -6.61863000 | 0.33344000  | C 2.30205600  | -1.73632900 | 4.15572200  |
| N -8.31832300 | -3.09300500 | -5.63793700 | H 3.00124800  | -1.09327500 | 4.68525400  |
| C -0.89911800 | 2.59883600  | -5.13393500 | C 4.22678000  | -2.59110900 | 2.76387100  |
| C 4.00748000  | -0.74682000 | -3.46584500 | H 4.83088400  | -2.00657100 | 3.46288900  |
| H 3.85133600  | -1.82084500 | -3.43146100 | H 4.67391400  | -3.58437800 | 2.67213700  |
| C 4.78974300  | -2.65041200 | 0.36665200  | C 0.95013700  | -1.69378600 | 4.48183700  |
| H 5.01676400  | -3.70276500 | 0.53614100  | H 0.59121500  | -1.01841000 | 5.25038500  |
| C 4.47435100  | -0.04030600 | -2.34715000 | C 4.75955500  | 1.32269200  | -2.49696500 |
| C 4.54270500  | -0.69947200 | -1.01955100 | H 5.23456900  | 1.90659800  | -1.70925900 |
| C 4.15511200  | 0.02187800  | 0.12160800  | C -3.59397200 | 6.02670300  | -2.59154800 |
| H 3.91681800  | 1.07874200  | 0.07107600  | H -2.59270100 | 6.01950500  | -3.00773100 |
| C 1.83080400  | 2.25187800  | -5.65063700 | C -3.30771800 | 1.80443200  | 7.11594900  |
| C 0.88848000  | 1.41492500  | -6.25064600 | H -2.62903900 | 2.59053000  | 7.43983400  |
| H 1.20909200  | 0.63626900  | -6.93847800 | C -5.51597800 | 0.83168200  | 7.05272200  |
| C 1.86362000  | -3.45990000 | 2.52454000  | H -6.56618900 | 0.84845800  | 7.33569300  |
| H 2.22588800  | -4.15807600 | 1.77146000  | C -4.46797700 | 4.98001500  | -2.89450600 |
| C 2.76768100  | -2.60598300 | 3.16675800  | C -5.22426300 | 3.10707300  | 8.10595400  |
| C 0.04301300  | 3.45708400  | -4.55599700 | H -4.54117600 | 3.52364500  | 8.84877700  |
| H -0.29574900 | 4.26065700  | -3.91197600 | H -6.18846500 | 2.92392600  | 8.58523900  |
| C -0.46814000 | 1.58455000  | -5.99313200 | C -5.01471200 | -0.25823900 | 6.34812200  |
| H -1.20031300 | 0.93673800  | -6.46164100 | H -5.66703200 | -1.07509500 | 6.06093900  |
| C -1.40304100 | -2.47024100 | 4.15396700  | C -4.44231500 | -4.31564300 | 3.40854700  |
| C 1.39662800  | 3.28192600  | -4.81160700 | C -4.54487400 | 5.16699600  | 6.90675800  |
| H 2.11773100  | 3.96304600  | -4.36573400 | H -3.75236000 | 5.23089300  | 7.64477900  |
| C -3.66013000 | -0.31543300 | 6.01081700  | C -6.63993800 | 4.91224400  | 5.15457500  |
| C 0.51526000  | -3.42814600 | 2.85878400  | C -6.18955800 | 6.05109000  | -1.57780000 |
| H -0.18621800 | -4.09798000 | 2.37360600  | H -7.21209400 | 6.06788900  | -1.20715200 |
| C -3.13282900 | -1.45091300 | 5.20055100  | C -6.22821800 | -6.17309900 | 2.31772300  |
| C 4.08068800  | -0.62518300 | 1.33107800  | C -6.49853000 | 4.06756200  | 6.23810800  |
| H 3.78867700  | -0.12797200 | 2.24839300  | C -5.31031700 | 7.09123900  | -1.26095200 |
| C -2.80496400 | 0.71455700  | 6.41707600  | C -5.77438200 | 5.00685900  | -2.39382200 |
| H -1.74865300 | 0.64862600  | 6.18177600  | H -6.45916100 | 4.20969200  | -2.66058200 |
| N -5.74804600 | 7.74867100  | 1.08708100  | C -5.66651900 | 5.88664600  | 4.90442100  |

C -4.62764300 6.03354500 5.82869800  
H -3.87862200 6.81232200 5.72769300  
C -5.44184700 0.96787000 -5.43522200  
C -8.30468000 -4.73304700 -3.41093900  
C -8.17954500 -5.46783300 -2.12177300  
C -4.52034900 6.81526300 2.89019600  
H -3.56242100 6.47880300 3.27129300  
C -4.01541900 -5.20499600 2.41599500  
H -2.98273400 -5.17251500 2.08694600  
C -4.01533000 7.07954600 -1.78400000  
H -3.33851400 7.90882300 -1.58951900  
C -4.90450100 -6.12143100 1.86994300  
H -4.55804800 -6.81427300 1.10613100  
C -5.70031800 6.65000800 3.62626500  
C -4.57542200 7.35620000 1.62194100  
H -3.70225900 7.45440800 0.98584200  
C -9.39333000 -3.12368600 -4.82928500  
H -10.22278600 -2.47730400 -5.09545200  
C -7.32700000 -7.28492200 -0.79486500  
H -6.85981600 -8.25685300 -0.67717100  
C -7.20397300 -7.13770900 1.68589800  
H -6.76780200 -8.12374600 1.51492200  
H -8.11393600 -7.25853900 2.27916900  
C -7.66712900 0.02521500 -5.43792000  
H -8.70331700 0.06817300 -5.10929600  
C -7.24826600 -0.97975600 -6.31453400  
C -5.75727900 8.21092800 -0.35057400  
H -5.09642400 9.07964600 -0.40504800  
H -6.77683500 8.53874400 -0.56251900  
C -5.75841300 -4.38099500 3.87122100  
H -6.07704300 -3.71301500 4.66361300  
C -6.64543400 -5.30926200 3.33255300  
H -7.65689700 -5.37621800 3.72737100  
C -5.92828500 -0.98883900 -6.76995800  
H -5.60166200 -1.73188500 -7.49415500

C -5.02889800 -0.02227800 -6.32986800  
H -4.00530600 -0.02055200 -6.68697400  
C -6.89320900 7.12442000 3.07363800  
H -7.83278800 7.07970100 3.61530300  
C -9.41340100 -3.93345900 -3.70465900  
H -10.29805700 -3.92892200 -3.07618800  
C -6.77278100 0.99569900 -5.00458100  
H -7.09801500 1.78812000 -4.33989700  
C -7.58619300 -6.73061900 -2.03951300  
H -7.31995300 -7.29720000 -2.92602500  
C -8.21145800 -2.06522900 -6.73691600  
H -9.22104400 -1.68787300 -6.91121000  
H -7.88017700 -2.59373200 -7.63377200  
C -6.88644300 7.67465600 1.80071300  
H -7.78674700 8.05042000 1.32589500  
C -7.26965800 -3.90900900 -5.41832100  
H -6.44989300 -3.83868500 -6.12500800  
C -7.24062900 -4.74635600 -4.32057800  
H -6.36144800 -5.36067700 -4.15868100  
C -8.26755600 -5.43243700 0.28048700  
H -8.48605500 -4.96388900 1.23403000  
C -8.56449700 -4.84072300 -0.93017100  
H -9.04538300 -3.86854100 -0.92975600  
C 3.70244200 -0.05559000 -4.62044300  
H 3.27898100 -0.53588500 -5.49550900  
H 7.22414500 -4.99892900 -3.65679900  
H 9.94788200 4.47674100 3.33973000  
H 9.01103600 3.14901200 4.04697500  
H 9.12460000 1.83843200 2.00744300  
H 10.75571300 2.52228000 2.22418900  
H 7.06601600 -4.23209400 -2.05475200  
H 5.89000400 -6.41337400 -2.21557500  
H 4.87041700 -5.76364700 -3.52586400  
H -7.48143800 4.76416300 4.48637800  
H -7.19350900 3.26180100 6.44783200

## Pyrene

C 1.26138900 0.30237300 1.29709900  
C 1.62537600 -1.05772300 1.10827500  
C 2.15149500 1.33595600 0.90021500  
C 2.86343000 -1.35718500 0.53020300  
C 0.70277300 -2.08447900 1.52049000  
C 0.00235700 0.63021900 1.88473300  
C 3.38014700 0.99284300 0.32613000

C 1.75546000 2.70607000 1.10391800  
C 3.73060700 -0.34066700 0.14389800  
H 3.14155300 -2.39781600 0.38527600  
C -0.49169300 -1.77353900 2.07794800  
H 0.99048200 -3.12204800 1.37195100  
C -0.36161300 1.99027000 2.07351500  
C -0.88778200 -0.40338900 2.28167700

H 4.06107900 1.78368500 0.02244500  
C 0.56092000 3.01700800 1.66133400  
H 2.44301700 3.48977300 0.79655500  
H 4.68794000 -0.58961800 -0.30358600  
H -1.17922400 -2.55719700 2.38550300  
C -1.59977200 2.28975500 2.65156500

C -2.11635100 -0.06028300 2.85566200  
H 0.27329300 4.05459400 1.80993500  
C -2.46693100 1.27331300 3.03781700  
H -1.87779600 3.33043500 2.79638600  
H -2.79732300 -0.85103800 3.15951700  
H -3.42425500 1.52212500 3.48537400

## PCA

C -1.24147700 3.75255700 -1.40781800  
C -1.72472700 2.38937900 -1.08720900  
O -0.22452300 4.05624200 -1.99025000  
H -1.92965700 4.54931300 -1.05250100  
C -2.94995600 2.33058000 -0.41598700  
C -1.03847700 1.19546900 -1.41447500  
C -3.52510800 1.12434200 -0.05688600  
H -3.45785000 3.26159400 -0.17447500  
C -1.62988900 -0.04658900 -1.04506400  
C 0.22831100 1.17552000 -2.10223400  
C -2.87958500 -0.07825300 -0.36363900  
H -4.47781500 1.10019300 0.46437900  
C -0.97280100 -1.27667200 -1.35580200  
C 0.84465200 0.00249400 -2.39254100

H 0.67559500 2.11936900 -2.38229500  
C -3.45184700 -1.34877700 -0.00380800  
C 0.27319300 -1.26460600 -2.03368300  
C -1.56036900 -2.51764100 -0.99009600  
H 1.79924500 0.00500400 -2.91265500  
C -2.82416300 -2.51078900 -0.30227600  
H -4.40539800 -1.35089000 0.51710500  
C 0.90440300 -2.47844200 -2.33141000  
C -0.89861100 -3.70829000 -1.30553400  
H -3.26497500 -3.46503600 -0.02559700  
C 0.32349500 -3.68794300 -1.97050200  
H 1.85836900 -2.46246100 -2.85180900  
H -1.35202900 -4.65484100 -1.02323900  
H 0.82476400 -4.62085700 -2.20818200

## (PCA)<sub>2</sub>

C

C -2.43285200 -1.82987900 0.49519100  
C -2.42613800 -3.24754700 0.45193200  
C -3.53133600 -1.11370300 -0.05355500  
C -3.51618600 -3.92499700 -0.10933200  
C -1.29102000 -3.94577800 0.99040300  
C -1.33715900 -1.12789200 1.08697000  
C -4.60169000 -1.82304700 -0.61153800  
C -3.52557900 0.32371000 0.00848400  
C -4.59553500 -3.21667500 -0.62718300  
H -3.52037500 -5.01153800 -0.12290400  
C -0.24334600 -3.28379400 1.54391400  
H -1.29051800 -5.03227500 0.93789600  
C -1.37029200 0.29312300 1.13949700  
C -0.22785200 -1.84537700 1.62147400  
H -5.46114600 -1.26710600 -0.98855100  
C -2.49921700 0.99386300 0.58646300  
H -4.37927100 0.86277900 -0.39704400  
H -5.44977700 -3.76480900 -1.01481300  
H 0.61588500 -3.82033200 1.92450000

## AzaEx<sup>2</sup>Cage<sup>6+</sup>

-2

C -0.30640000 0.98710000 1.72848300  
C 0.83853500 -1.10806300 2.18918700  
H -2.50506500 2.08040100 0.63651800  
C 0.77654800 0.29188700 2.23342800  
H -0.33838500 2.07205600 1.77114000  
C 2.06500400 -1.69071100 2.76311300  
H 1.61036900 0.83744500 2.67021300  
O 2.33610800 -2.87032800 2.91555900  
H 2.79816700 -0.92242300 3.08190200  
C -1.24156900 7.43175400 2.05417500  
N -1.10478900 7.59680100 3.38474900  
C -0.16252300 7.58297300 1.20748000  
H -2.22614200 7.13624400 1.70730700  
C -2.28569100 7.27828900 4.26565200  
C 0.07326100 7.97598900 3.91300100  
C 1.09755200 7.88834800 1.73804100  
H -0.30587400 7.40519900 0.14705900  
C -2.70177100 5.83732900 4.07198400  
H -1.97294600 7.48681700 5.29112400

|               |             |             |                |             |             |
|---------------|-------------|-------------|----------------|-------------|-------------|
| H -3.08183100 | 7.97825000  | 3.99921100  | C -6.90726400  | -1.44021000 | 1.72322200  |
| C 1.19572600  | 8.12519700  | 3.11188100  | C 4.74335400   | 2.75830800  | -2.79268400 |
| H 0.09898200  | 8.13807300  | 4.98561400  | H 3.09231800   | 3.47351500  | -3.96540000 |
| C 2.29442600  | 7.83667400  | 0.85315900  | H 6.47607900   | 2.34101700  | -1.59586500 |
| C -3.93412900 | 5.52805100  | 3.49499300  | C -2.17823200  | -3.91559900 | 4.65353000  |
| C -1.84861600 | 4.80242800  | 4.47141400  | H -3.89940300  | -3.10802400 | 3.63788200  |
| H 2.12932900  | 8.42672800  | 3.57666300  | C -0.53505200  | -2.30058800 | 5.37007600  |
| C 2.27121100  | 8.33617400  | -0.45215900 | H -0.99536200  | -0.24047500 | 4.94362700  |
| C 3.45000000  | 7.17430300  | 1.28666000  | C -7.96799200  | 0.48639800  | 0.01046200  |
| C -4.30721000 | 4.19847400  | 3.30844500  | H -6.63360400  | 1.86464700  | 0.99284400  |
| H -4.62178200 | 6.32196700  | 3.21366700  | C -7.90802100  | -1.78860000 | 0.82126800  |
| C -2.21774000 | 3.47784500  | 4.28433400  | H -6.49031900  | -2.18195800 | 2.39561600  |
| H -0.90070500 | 5.03016200  | 4.95484200  | C 4.44875300   | 1.32668500  | -3.08397100 |
| C 3.34175100  | 8.08913200  | -1.29770800 | C -0.97144700  | -3.62783300 | 5.29180200  |
| H 1.43459500  | 8.91733400  | -0.82722900 | H -2.54338500  | -4.93885200 | 4.60931800  |
| C 4.47965500  | 6.94389800  | 0.39609300  | H 0.39430700   | -2.05996600 | 5.88247800  |
| H 3.54016700  | 6.78939300  | 2.29671400  | C -8.41905900  | -0.83485600 | -0.06323100 |
| C -3.44909500 | 3.16636700  | 3.69352500  | H -8.39636100  | 1.24875700  | -0.63657900 |
| H -5.27272000 | 3.95651400  | 2.87790800  | H -8.29494000  | -2.80527100 | 0.81755500  |
| H -1.56917800 | 2.67109200  | 4.60828600  | N 5.30325300   | 0.39990200  | -2.64034700 |
| N 4.39787600  | 7.36711000  | -0.88008900 | N 3.32062700   | 1.06039800  | -3.74622400 |
| H 3.36811500  | 8.44434500  | -2.32251400 | C -0.19190800  | -4.73240600 | 5.97001500  |
| H 5.37343100  | 6.38999600  | 0.66225900  | C -9.36645900  | -1.24385700 | -1.17024400 |
| C -3.83745300 | 1.74317600  | 3.48004700  | C 4.95624100   | -0.86537600 | -2.88981600 |
| C 5.44971300  | 6.90787800  | -1.85578800 | C 3.07974100   | -0.23236600 | -3.97823300 |
| N -3.01163700 | 0.79905800  | 3.93752800  | N 1.10253000   | -5.02081400 | 5.26772100  |
| N -4.96724100 | 1.50108400  | 2.80968600  | H 0.06620300   | -4.47251400 | 6.99886900  |
| C 5.22037500  | 5.45045600  | -2.19195600 | H -0.75428300  | -5.66878000 | 5.99208000  |
| H 5.37074500  | 7.55659700  | -2.73079200 | N -8.52849300  | -1.48207700 | -2.40129700 |
| H 6.42025000  | 7.08166900  | -1.38589400 | H -9.90021300  | -2.17219200 | -0.95565300 |
| C -3.39893400 | -0.46188300 | 3.72049800  | H -10.09502500 | -0.47046400 | -1.42154300 |
| C -5.25063900 | 0.21167500  | 2.61524200  | C 5.79456400   | -1.94887800 | -2.30771400 |
| C 4.15434200  | 5.09086500  | -3.02319500 | N 3.85732500   | -1.23043500 | -3.56041000 |
| C 6.05486900  | 4.45681000  | -1.67596400 | C 1.85609300   | -0.58002400 | -4.75572000 |
| C -2.53254600 | -1.56159500 | 4.22869300  | C 1.06740700   | -5.64610500 | 4.07576900  |
| N -4.51087900 | -0.80404700 | 3.06609600  | C 2.27297700   | -4.63494800 | 5.80849000  |
| C -6.41910300 | -0.13150800 | 1.75928500  | C -8.36107600  | -0.50384700 | -3.30935200 |
| C 3.91444900  | 3.75681300  | -3.31827200 | C -7.80558700  | -2.61745500 | -2.47123700 |
| H 3.52041300  | 5.85630900  | -3.46608000 | C 6.97038000   | -1.64921400 | -1.61643600 |
| C 5.82042500  | 3.11580300  | -1.97935400 | C 5.33396900   | -3.26963400 | -2.34580300 |
| H 6.91420400  | 4.72579300  | -1.06618300 | C 1.61317200   | -1.90392600 | -5.13079500 |
| C -2.95155300 | -2.88924600 | 4.11721000  | C 0.96554500   | 0.42366800  | -5.15052600 |
| C -1.31144400 | -1.27379700 | 4.85008800  | C 2.22535600   | -5.86814300 | 3.35837100  |
| C -6.98311500 | 0.83965300  | 0.92533500  | H 0.08517900   | -5.93481600 | 3.71637600  |

C 3.46144200 -4.80878700 5.12231200  
H 2.22847000 -4.18341800 6.79365300  
C -7.36268400 -0.58943400 -4.26790800  
H -9.01365100 0.35864400 -3.22345300  
C -6.79215700 -2.75390100 -3.39862500  
H -8.03714300 -3.38211500 -1.73707400  
C 7.62981700 -2.64159500 -0.89386000  
H 7.34516300 -0.63126800 -1.61950200  
C 5.98817000 -4.25677600 -1.62194300  
H 4.44314900 -3.50225700 -2.91841100  
C 0.50256300 -2.21748700 -5.90882200  
H 2.31672300 -2.67593400 -4.83840800  
C -0.14757200 0.10900200 -5.92108000  
H 1.17003000 1.45133900 -4.87022100  
C 3.44417600 -5.40020200 3.85813900  
H 2.15734200 -6.34845000 2.38809100  
H 4.38533400 -4.47690400 5.58474900  
C -6.51285800 -1.69809400 -4.27508600  
H -7.22647600 0.24090200 -4.95324200  
H -6.21748800 -3.67397100 -3.42130400  
C 7.11951600 -3.94165200 -0.86238000  
H 8.54237600 -2.39862600 -0.35444900  
H 5.61425100 -5.27850300 -1.64835700  
C -0.38096300 -1.21261600 -6.31475400  
H 0.34873800 -3.24322000 -6.23606800  
H -0.81335600 0.90284600 -6.25248800  
C 4.65614300 -5.40966600 2.99808100  
C -5.27201900 -1.71609000 -5.09689500  
C 7.70998500 -4.98696000 0.05717000  
C -1.54879500 -1.54671400 -7.20769300  
C 5.03610700 -6.51023600 2.22620700  
C 5.40191300 -4.22910400 2.88667300  
C -4.07264400 -2.08489400 -4.47521900  
C -5.22928500 -1.31690800 -6.43606700  
N 6.73448200 -5.21333900 1.18672800  
H 7.85688000 -5.95274000 -0.43048900  
H 8.65685300 -4.67212500 0.50246800  
N -2.86560900 -1.60096100 -6.45844800  
H -1.68415800 -0.79554800 -7.98874200  
H -1.43007100 -2.52514600 -7.68164000

C 6.08291700 -6.38204600 1.32338000  
H 4.53318200 -7.46866200 2.30862800  
C 6.43489300 -4.16195200 1.97626800  
H 5.13590900 -3.34490300 3.45555400  
C -2.88510300 -2.01032900 -5.17704300  
H -4.04731400 -2.38787600 -3.43091400  
C -4.00960600 -1.27744300 -7.09425600  
H -6.12663900 -1.04887100 -6.98522100  
H 6.40405500 -7.19866100 0.68498100  
H 7.01653100 -3.26116200 1.80941400  
H -1.92038800 -2.24235100 -4.73807400  
H -3.92206800 -0.98261800 -8.13541900  
C -1.50447000 2.14890600 -2.35288300  
C -0.62289600 0.97969200 -2.13339400  
O -1.33460400 3.27523600 -1.94122000  
H -2.42131000 1.90614300 -2.93207000  
C -1.16093100 -0.25980100 -2.49696700  
C 0.64308300 1.04669700 -1.51027700  
C -0.49228700 -1.44467000 -2.24754800  
H -2.15038900 -0.27610400 -2.95257500  
C 1.32215900 -0.17364700 -1.23142500  
C 1.27295000 2.28751900 -1.13216600  
C 0.75383300 -1.42294300 -1.60639900  
H -0.93863800 -2.40584400 -2.49601300  
C 2.57419600 -0.15324000 -0.54383700  
C 2.46745800 2.29566400 -0.48844900  
H 0.77082600 3.21341300 -1.37671000  
C 1.45277400 -2.63977400 -1.29044300  
C 3.15292000 1.08086700 -0.14900100  
C 3.22892700 -1.37037400 -0.21993600  
H 2.94235700 3.23944500 -0.22737100  
C 2.62871900 -2.61521400 -0.61783300  
H 1.00016100 -3.58262500 -1.58581000  
C 4.37249000 1.08027800 0.54057800  
C 4.44469100 -1.32768700 0.46988700  
H 3.14890700 -3.53677900 -0.36764200  
C 5.01528600 -0.11509100 0.84450800  
H 4.82134000 2.02883800 0.82419200  
H 4.95538400 -2.26685300 0.67334500  
H 5.97031200 -0.09753400 1.36143300

## 8. References

1. Samanta, J.; Natarajan, R. *Org. Lett.* **2016**, *18*, 3394.
2. Thordarson, K., Bindfit, <http://app.supramolecular.org/bindfit/>, accessed 23rd March 2016.
3. Dolomanov, O. V.; Bourhis, L. J.; Gildea, R. J.; Howard, J. A. K.; Puschmann, H. *J. Appl. Cryst.* **2009**, *42*, 339.
4. Sheldrick, G.M. (2015). *Acta Cryst.* A71, 3.
5. Sheldrick, G.M. (2015). *Acta Cryst.* C71, 3.
6. Sheldrick, G.M. (2008). *Acta Cryst.* A64, 112.
7. Frisch, M. J.; Trucks, G. W.; Schlegel, H. B.; Scuseria, G. E.; Robb, M. A.; Cheeseman, J. R.; Scalmani, G.; Barone, V.; Mennucci, B.; Petersson, G. A.; Nakatsuji, H.; Caricato, M.; Li, X.; Hratchian, H. P.; Izmaylov, A. F.; Bloino, J.; Zheng, G.; Sonnenberg, J. L.; Hada, M.; Ehara, M.; Toyota, K.; Fukuda, R.; Hasegawa, J.; Ishida, M.; Nakajima, T.; Honda, Y.; Kitao, O.; Nakai, H.; Vreven, T.; Montgomery, J. A., Jr.; Peralta, J. E.; Ogliaro, F.; Bearpark, M.; Heyd, J. J.; Brothers, E.; Kudin, K. N.; Staroverov, V. N.; Kobayashi, R.; Normand, J.; Raghavachari, K.; Rendell, A.; Burant, J. C.; Iyengar, S. S.; Tomasi, J.; Cossi, M.; Rega, N.; Millam, J. M.; Klene, M.; Knox, J. E.; Cross, J. B.; Bakken, V.; Adamo, C.; Jaramillo, J.; Gomperts, R.; Stratmann, R. E.; Yazyev, O.; Austin, A. J.; Cammi, R.; Pomelli, C.; Ochterski, J. W.; Martin, R. L.; Morokuma, K.; Zakrzewski, V. G.; Voth, G. A.; Salvador, P.; Dannenberg, J. J.; Dapprich, S.; Daniels, A. D.; Farkas, O.; Foresman, J. B.; Ortiz, J. V.; Cioslowski, J.; Fox, D. J.; Gaussian 09, revision C.01; Gaussian Inc.: Wallingford, CT, 2010.
8. Zhao, Y.; Truhlar, D. G. *Acc. Chem. Res.* **2008**, *41*, 157.
9. Zhao, Y.; Truhlar, D. G. *Theor. Chem. Acc.* **2008**, *120*, 215.
10. Hehre, W. J.; Radom, L.; Schleyer, P. v. R.; Pople, J. A. *Ab Initio Molecular Orbital Theory*; Wiley: New York, 1986.
11. Marenich, A. V.; Cramer, C. J.; Truhlar, D. G. *J. Phys. Chem. B* **2009**, *113*, 6378.
12. Johnson, E. R.; Keinan, S.; Mori-Sanchez, P.; Contreras-Garcia, J.; Cohen, A. J.; Yang, W. T. *J. Am. Chem. Soc.* **2010**, *132*, 6498.
13. Lu, T.; Chen, F. *J. Comput. Chem.* **2012**, *33*, 580.
14. Humphrey, W., Dalke, A. and Schulten, K., *J. Molec. Graphics* **1996**, *14.1*, 33.
15. Legault, C. Y. CYLView **2009**, 1.0b, <http://www.cylview.org>.
